# Supplementary material
Source: publisher figshare collection journal article supplement (https://plos.figshare.com/articles/dataset/_/790268)
Supplement: Supplementary file 1 [file 1]

Archive with 16 entries (16 files):
- Figure_S1.pdf
- Figure_S2.pdf
- Figure_S3.pdf
- Table_S1.xls
- Table_S2.xlsx
- Table_S3.pdf
- Table_S4.docx
- Table_S5.docx
- Table_S6.xlsx
- Table_S7.xlsx
- Table_S8.xlsx
- Table_S9.xlsx
- Table_S10.xlsx
- Table_S11.pdf
- Table_S12.docx
- Text_S1.docx
