# Supplementary material
Source: publisher figshare collection journal article supplement (https://plos.figshare.com/articles/dataset/_/790268)
Supplement: Supplementary file 1 [file 1 › Table_S1.xls]

## Sheet: TFmutant_methylationmutant_kina
Table S1 The pair-wise Jaccard similarity index (JI) values between target gene sets for deletion mutants of the regulators shown in Fig. S1.
Regulator1	Regulator2	No. of common targets	No. of targets of regulator1	No. of targets of regulator2	JI(regulator1,regulator2)
MSI1	MIG1	7	27	30	0.14
XBP1	PHO4	7	20	37	0.14
SPT2	SRB8	7	28	29	0.14
HOG1	SIF2	7	22	35	0.14
SSK2	STE20	7	27	30	0.14
SAS5	SWR1	7	24	33	0.14
UGA3	RGM1	7	15	42	0.14
HAP5	RPH1	7	16	41	0.14
CAD1	SIN4	64	95	426	0.140044
EAF7	VPS15	52	70	353	0.140162
ITC1	HTL1	23	75	112	0.140244
IES3	PTP2DELPTP3	31	57	195	0.140271
ISW1	ACE2	8	22	43	0.140351
RTF1	HAL5DELSAT4	40	135	190	0.140351
ARG80	KSS1	8	31	34	0.140351
MED1	VPS15	57	110	353	0.140394
HAL5DELSAT4	PTC1	57	190	273	0.140394
LDB7	SIR3	17	48	90	0.140496
RTF1	PAF1	72	135	449	0.140625
BRE1	SNF2	37	131	169	0.140684
CACC2	MED3	39	138	178	0.140794
NPL6	BUR2	80	300	348	0.140845
CDC73	SPT20	84	231	449	0.14094
DUN1DELPPH3	SWI3	32	78	181	0.140969
FLO8	SIR1	11	41	48	0.141026
SNF2	RSC2	49	169	227	0.14121
YVH1	SNF5	38	144	163	0.141264
MED1	TUP1	89	110	609	0.14127
RGM1	RSC1	13	42	63	0.141304
EAF5	RSC1	13	21	84	0.141304
FAB1	SLT2DELPTP3	13	34	71	0.141304
PHO85	SWI3	42	158	181	0.141414
RIC1	SWI4	15	53	68	0.141509
PGD1	HAP2	15	31	90	0.141509
BCK1DELPTP3	CKA2	15	35	86	0.141509
SIT4	HFI1	76	173	440	0.141527
MED31	MED3	31	72	178	0.141553
ELM1	IES2	17	37	100	0.141667
STE11	ASF1	18	43	102	0.141732
NNF2	IXR1	21	25	144	0.141892
ITC1	ASF1	22	75	102	0.141935
ELM1	MED9	22	37	140	0.141935
NPL6	ARK1DELPRK1	155	300	947	0.141941
SET1	CACC2	24	55	138	0.142012
HFI1	SPT20	98	339	449	0.142029
MED3	SPT20	78	178	449	0.142077
IES2	CDK8	57	100	358	0.142145
PBS2DELPTK2	SNF2	30	72	169	0.14218
KSS1DELFUS3DELHOG1	SNF2	31	80	169	0.142202
CTK1	ARK1DELPRK1	191	585	947	0.142431
MGA2	RSC2	48	158	227	0.142433
SIR2	CST6	106	230	620	0.142473
SOK2	VPS15	59	120	353	0.142512
IES6	SPT20	96	320	449	0.142645
SPT7	PAF1	96	320	449	0.142645
RSC1	NPL6	48	84	300	0.142857
OAF1	HDA1	6	18	30	0.142857
LEO1	CTI6	11	29	59	0.142857
YDR049W	YER130C	5	19	21	0.142857
RDS1	MAC1	10	18	62	0.142857
THI2	PIP2	9	25	47	0.142857
STB4	DOT6	3	11	13	0.142857
OTU1	NRG1	4	13	19	0.142857
MED5	CTI6	12	37	59	0.142857
YPR022C	CBF1	7	15	41	0.142857
CAD1	SNF6	81	95	553	0.142857
YML081W	CBF1	8	23	41	0.142857
HIR1	STB2	3	10	14	0.142857
RFX1	RFX1	5	16	24	0.142857
DOT6	MSI1	5	13	27	0.142857
MIG3	JHD1	3	12	12	0.142857
YOX1	HOG1	4	10	22	0.142857
GSM1	GAT3	5	19	21	0.142857
SMP1	ROX1	6	10	38	0.142857
CACC2	MED2	48	138	246	0.142857
OAF1	MIG1	6	18	30	0.142857
CAC1	RFM1	25	85	115	0.142857
SNT2	STB2	3	10	14	0.142857
SMK1	WTM2	6	15	33	0.142857
SUM1	CACC2	33	126	138	0.142857
DOT6	SWI5	4	13	19	0.142857
YDR266C	SWI4	11	20	68	0.142857
SNF2	CDC73	50	169	231	0.142857
YER130C	SIF2	7	21	35	0.142857
PIB2	NNF2	5	15	25	0.142857
YGR067C	HDA1	6	18	30	0.142857
SPT2	SWI4	12	28	68	0.142857
YOX1	NOT3	3	10	14	0.142857
PTK2	BCK1DELPTP3	6	13	35	0.142857
SRB8	SIF2	8	29	35	0.142857
STE11	CAC1	16	43	85	0.142857
SMK1	RPI1	4	15	17	0.142857
SRB8	CUP2	8	29	35	0.142857
SAS5	ARP6	6	24	24	0.142857
RCO1	SET2	4	12	20	0.142857
DIG1	YHP1	12	19	77	0.142857
CKA2	MED16	30	86	154	0.142857
SAS4	SAS4	7	20	36	0.142857
ELM1	PTP2DELPTP3	29	37	195	0.142857
YFL052W	RDR1	3	12	12	0.142857
SMK1	STP4	5	15	25	0.142857
OTU1	YDR049W	4	13	19	0.142857
CRZ1	SUM1	15	21	99	0.142857
OTU1	SWI5	4	13	19	0.142857
NOT3	RGM1	7	14	42	0.142857
GAT3	SSN2	6	21	27	0.142857
DOT6	YDR049W	4	13	19	0.142857
PGD1	SRB2	10	31	49	0.142857
PHO4	UME1	7	23	33	0.142857
RSC30	LDB7	9	24	48	0.142857
SMK1	YHP1	4	15	17	0.142857
RIM11	PTK2	3	11	13	0.142857
IOC3	ISW1	11	16	72	0.142857
EAF5	CTI6	10	21	59	0.142857
YFL052W	CHA4	4	12	20	0.142857
BCK1	RIM15	3	11	13	0.142857
YOX1	SKO1	3	10	14	0.142857
CRZ1	CUP2	7	21	35	0.142857
RPI1	PHO4	5	17	23	0.142857
MED20	HFI1	73	143	440	0.143137
HAL5DELSAT4	VPS15	68	190	353	0.143158
CTR9	ARK1DELPRK1	183	514	947	0.143192
SPT7	CDK8	85	320	358	0.143339
SIT4	SPT20	78	173	449	0.143382
MED9	SNF5	38	140	163	0.143396
SIR3	SWI3	34	90	181	0.14346
HFI1	MIH1DELELM1	135	440	636	0.143464
SPT3	CST6	98	161	620	0.143485
HAL5DELSAT4	SPT7	64	190	320	0.143498
IES2	EAF1	30	100	139	0.143541
CBF1	MGA2	25	41	158	0.143678
MED20	CDC73	47	143	231	0.143731
SGF29	SWD3	20	70	89	0.143885
IES3	ASF1	20	57	102	0.143885
SFP1	SNF6	137	536	553	0.143908
SPT20	PAF1	113	449	449	0.143949
SPT7	CTR9	105	320	514	0.144033
LDB7	SIR4	17	48	87	0.144068
SDC1	HST1	17	30	105	0.144068
HFI1	PAF1	112	440	449	0.144144
NPL6	MIH1DELELM1	118	300	636	0.144254
SNF1DELRIM11	FUS3	13	48	55	0.144444
SGF73	SWI3	36	104	181	0.144578
SSN2	SWI4	12	27	68	0.144578
SET1	RTF1	24	55	135	0.144578
WTM2	MAC1	12	33	62	0.144578
RPH1	RTG3	11	41	46	0.144737
MED31	ASF1	22	72	102	0.144737
SIR3	SNF6	33	90	171	0.144737
CTR9	NOT4	161	514	759	0.144784
RFM1	CACC2	32	115	138	0.144796
UME1	RTG3	10	33	46	0.144928
SWD1	RFM1	20	43	115	0.144928
PGD1	SIR1	10	31	48	0.144928
ITC1	CACC2	27	75	138	0.145161
HFI1	NOT4	152	440	759	0.145177
MED15	CTR9	115	393	514	0.145202
SNF12	CCR4	87	226	460	0.145242
SGF73	ADA2	43	104	235	0.14527
MED9	PTC1DELPPH3	85	140	530	0.145299
IES6	PTC1DELPTC2	100	320	468	0.145349
SNF12	TUP1	106	226	609	0.145405
NGG1	PTC1DELPPH3	96	226	530	0.145455
SWD1	MSI1	16	43	83	0.145455
FUS3	SLT2DELPTP3	16	55	71	0.145455
CRZ1	RGM1	8	21	42	0.145455
SNT1	YAF9	8	21	42	0.145455
SPT2	SIF2	8	28	35	0.145455
CKA2	MED18	23	86	95	0.14557
UME6	SPT3	38	138	161	0.145594
DUN1DELPPH3	MED18	22	78	95	0.145695
MED9	MED20	36	140	143	0.145749
CHA4	HAA1	7	20	35	0.145833
CHA4	CUP2	7	20	35	0.145833
MCK1	CTI6	14	51	59	0.145833
CAC1	HAL5DELSAT4	35	85	190	0.145833
NNF2	HDA1	7	25	30	0.145833
SNF5	GCN5	48	163	214	0.145897
MED31	SIR2	20	72	85	0.145985
FUS3DELKSS1	HTL1	20	45	112	0.145985
ISW2	SGF29	13	32	70	0.146067
SNF5	HAL5DELSAT4	45	163	190	0.146104
HFI1	ARK1DELPRK1	177	440	947	0.146281
CHA4	SSN2	6	20	27	0.146341
UME6	IXR1	36	138	144	0.146341
HAT2	GAL4	6	11	36	0.146341
SIF2	LEO1	6	18	29	0.146341
ELM1	IES3	12	37	57	0.146341
PTP2DELPTP3	RAD6	59	195	267	0.146402
MED18	SNF12	41	95	226	0.146429
MED9	RAD6	52	140	267	0.146479
LDB7	SIR2	17	48	85	0.146552
SNF6	VPS15	67	171	353	0.146608
MED16	HAL5DELSAT4	44	154	190	0.146667
YLR278C	MAC1	11	24	62	0.146667
MED1	NGG1	43	110	226	0.146758
CACC2	MED15	68	138	393	0.146868
PTP2DELPTP3	IES6	66	195	320	0.146993
UGA3	RFX1	5	15	24	0.147059
MIG3	MSI1	5	12	27	0.147059
YDR049W	YDR266C	5	19	20	0.147059
BCK1	HOG1	5	11	28	0.147059
RDR1	MSI1	5	12	27	0.147059
YGR067C	YAP7	5	18	21	0.147059
EAF5	IES3	10	21	57	0.147059
SOK2	YDR266C	5	19	20	0.147059
FUS3DELKSS1	MED31	15	45	72	0.147059
YPR196W	URC2	5	16	23	0.147059
STE7	SLT2DELPTP3	15	46	71	0.147059
HAT2	ESC2	5	11	28	0.147059
CTR9	TUP1	144	514	609	0.147089
ISW1	RFM1	24	72	115	0.147239
SIR2	ASF1	24	85	102	0.147239
EAF1	RSC2	47	139	227	0.147335
YPK1	HAL5DELSAT4	47	176	190	0.147335
MED18	MED16	32	95	154	0.147465
SET1	CAC1	18	55	85	0.147541
SIF2	CUP2	9	35	35	0.147541
RSC1	RSC2	40	84	227	0.147601
HAL5DELSAT4	GCN5	52	190	214	0.147727
LEO1	MED31	13	29	72	0.147727
CTI6	MED20	26	59	143	0.147727
EAF1	PTP2DELPTP3	43	139	195	0.147766
CDK8	SPT20	104	358	449	0.147937
BAS1	SNF6	87	122	553	0.147959
SIR4	SNF2	33	87	169	0.147982
NPL6	CCR4	98	300	460	0.148036
YFL052W	SOK2	4	12	19	0.148148
YFL052W	NRG1	4	12	19	0.148148
ZAP1	RPI1	4	14	17	0.148148
YOX1	YER130C	4	10	21	0.148148
MIG3	YDR049W	4	12	19	0.148148
UGA3	EDS1	4	15	16	0.148148
CHA4	RGM1	8	20	42	0.148148
YOX1	CRZ1	4	10	21	0.148148
SRB8	WTM2	8	29	33	0.148148
RDR1	YDR049W	4	12	19	0.148148
YAP3	SKN7	4	15	16	0.148148
SUT2	SWI5	4	12	19	0.148148
STB2	RPI1	4	14	17	0.148148
RGT1	WTMATAVSWT	4	13	18	0.148148
RTT107	HAP5	4	15	16	0.148148
STE7	DUN1DELPPH3	16	46	78	0.148148
PTC1	MED15	86	273	393	0.148276
IES3	CTI6	15	57	59	0.148515
CDK8	CTK1	122	358	585	0.148599
IES3	ARP8	22	57	113	0.148649
ISW2	SUS1	11	32	53	0.148649
CKA2	SNF2	33	86	169	0.148649
YHP1	SWI4	11	17	68	0.148649
RTF1	CTR9	84	135	514	0.148673
LGE1	CDC73	40	78	231	0.148699
MED9	SNF2	40	140	169	0.148699
CACC2	SNF6	40	138	171	0.148699
UME6	SIR3	36	138	140	0.14876
URC2	ARG80	7	23	31	0.148936
ARG81	MSN1	7	23	31	0.148936
DUN1DELPPH3	CACC2	28	78	138	0.148936
CSE2	SRB8	7	25	29	0.148936
CTI6	SAP30	28	59	157	0.148936
YDR049W	CUP2	7	19	35	0.148936
SNF12	RAD6	64	226	267	0.149184
PTC1	IES6	77	273	320	0.149225
YPR022C	MAC1	10	15	62	0.149254
RIM101	SIR3	30	91	140	0.149254
CTI6	MED18	20	59	95	0.149254
HAP4	ADR1	10	27	50	0.149254
SIR2	SNF2	33	85	169	0.149321
ADA2	PTC1	66	235	273	0.149321
ISW1	HST1	23	72	105	0.149351
FUS3DELKSS1	DUN1DELPPH3	16	45	78	0.149533
ASF1	RAD6	48	102	267	0.149533
STE7	YHP1	16	46	77	0.149533
PTP2DELPTP3	SPT7	67	195	320	0.149554
MED1	HSL1DELCLA4	41	110	205	0.149635
SWD1	SUM1	22	43	126	0.14966
BCK1	CMK2	3	11	12	0.15
STB4	RDR1	3	11	12	0.15
KSS1	HAA1	9	34	35	0.15
STB4	YFL052W	3	11	12	0.15
RIM11	CAF130	3	11	12	0.15
FAB1	BCK1DELPTP3	9	34	35	0.15
MIG1	PGD1	8	30	31	0.150943
CTK1	TUP1	157	585	609	0.151398
GCN5	RSC2	58	214	227	0.151436
IES6	VPS15	89	320	353	0.152397
FAB1	DUN1	9	34	34	0.152542
MED16	SNF5	42	154	163	0.152727
EAF1	MED9	37	139	140	0.152893
CTR9	PTC1DELPPH3	139	514	530	0.153591
CDK8	MED15	100	358	393	0.15361
RTT107	YAP3	4	15	15	0.153846
CRZ1	RFX1	6	21	24	0.153846
HOG1	PHO4	6	22	23	0.153846
AFT2	RFX1	6	21	24	0.153846
STB2	SEF1	4	14	16	0.153846
SRB8	ARG80	8	29	31	0.153846
CTK1	MIH1DELELM1	164	585	636	0.155156
RIM101	CAD1	25	91	95	0.15528
SPT3	MED16	41	151	154	0.155303
PHO85	SNF2	44	158	169	0.155477
CSE2	SSN2	7	25	27	0.155556
YAP1	CHA4	5	17	20	0.15625
WTMATAVSWT	DIG1	5	18	19	0.15625
MED15	PAF1	114	393	449	0.156593
SNF2	MED3	47	169	178	0.156667
ISW1	MSI1	21	72	83	0.156716
GCN4	MIG1	8	29	30	0.156863
SPT2	PGD1	8	28	31	0.156863
HDA2	SET1	14	48	55	0.157303
RAD6	SPT7	80	267	320	0.157791
SAS5	SAS5	6	20	24	0.157895
RSC2	ADA2	63	227	235	0.157895
EAF7	RSC1	21	70	84	0.157895
CRZ1	YML081W	6	21	23	0.157895
HIR1	SUT2	3	10	12	0.157895
SNT2	RDR1	3	10	12	0.157895
PGD1	HAA1	9	31	35	0.157895
GAT3	URC2	6	21	23	0.157895
SAS4	SAS5	6	20	24	0.157895
SWI3	GCN5	54	181	214	0.158358
NPL6	CDK8	90	300	358	0.158451
KSS1DELFUS3DELHOG1	MED18	24	80	95	0.15894
SIN4	SPT10	122	426	462	0.159269
SIR4	ASF1	26	87	102	0.159509
NOT3	SMK1	4	14	15	0.16
NOT3	YPR022C	4	14	15	0.16
RSC30	MED31	18	58	72	0.160714
RPI1	NRG1	5	17	19	0.16129
RPI1	YDR049W	5	17	19	0.16129
SLT2DELPTP3	KSS1DELFUS3DELHOG1	21	71	80	0.161538
RSC30	RTT106	17	58	64	0.161905
HFI1	CTR9	133	440	514	0.161998
HAL5DELSAT4	NGG1	58	190	226	0.162011
NRG1	RFX1	6	19	24	0.162162
NRG1	YLR278C	6	19	24	0.162162
YDR266C	YML081W	6	20	23	0.162162
SWD3	SGF73	27	89	104	0.162651
MED31	DUN1DELPPH3	21	72	78	0.162791
ZAP1	HAP4	7	23	27	0.162791
SAS5	SWC5	7	24	26	0.162791
FUS3DELKSS1	FUS3	14	45	55	0.162791
IES6	CDK8	95	320	358	0.16295
SPT2	GCN4	8	28	29	0.163265
RTT109	RAD6	69	224	267	0.163507
SIR3	ASF1	27	90	102	0.163636
SLT2DELPTP3	DUN1DELPPH3	21	71	78	0.164062
SLT2DELPTP3	SLT2DELCLA4	23	71	92	0.164286
SPT20	CTR9	136	449	514	0.16445
GCN5	RAD6	68	214	267	0.164649
MED20	MED16	42	143	154	0.164706
VPS15	CCR4	115	353	460	0.164756
RPI1	OAF1	5	17	18	0.166667
OAF1	RFX1	6	18	24	0.166667
MIG3	YPR196W	4	12	16	0.166667
SEF1	NRG1	5	16	19	0.166667
MIG3	SEF1	4	12	16	0.166667
DAL81	RFX1	6	18	24	0.166667
MED31	ITC1	21	72	75	0.166667
YGR067C	YLR278C	6	18	24	0.166667
SEF1	YDR049W	5	16	19	0.166667
SEF1	SWI5	5	16	19	0.166667
NRG1	YML081W	6	19	23	0.166667
GAT3	SPT2	7	21	28	0.166667
YHP1	YGR067C	5	17	18	0.166667
CUP2	HAA1	10	35	35	0.166667
GSM1	URC2	6	19	23	0.166667
RPI1	DAL81	5	17	18	0.166667
CCR4	TUP1	153	460	609	0.167031
ITC1	CAC1	23	75	85	0.167883
SNF12	MED2	68	226	246	0.168317
PAF1	CTK1	149	449	585	0.168362
HAL5DELSAT4	HSL1DELCLA4	57	190	205	0.168639
CCR4	PTC1DELPTC2	134	460	468	0.168766
MGA2	PTP2DELPTP3	51	158	195	0.168874
GAL4	PIP2	12	36	47	0.169014
RAD6	NPL6	82	267	300	0.169072
RTT109	NPL6	76	224	300	0.169643
CTI6	MED31	19	59	72	0.169643
SNF2	SFP1	140	428	536	0.169903
MSI1	SPT2	8	27	28	0.170213
STE7	RTT106	16	46	64	0.170213
HFI1	CCR4	131	440	460	0.170351
FUS3DELKSS1	RSC30	15	45	58	0.170455
NGG1	RSC2	66	226	227	0.170543
YDR266C	GAT3	6	20	21	0.171429
CHA4	YER130C	6	20	21	0.171429
PBS2DELPTK2	CAC1	23	72	85	0.171642
SPT3	HAL5DELSAT4	50	151	190	0.171821
CDK8	CCR4	120	358	460	0.17192
SLT2DELPTP3	PBS2DELPTK2	21	71	72	0.172131
STB2	YDR266C	5	14	20	0.172414
RTT107	SWI5	5	15	19	0.172414
RTT106	PBS2DELPTK2	20	64	72	0.172414
SMK1	YDR049W	5	15	19	0.172414
PIB2	GSM1	5	15	19	0.172414
NOT3	MBF1	5	14	20	0.172414
CAC2	SWI3	47	138	181	0.172794
CTR9	CTK1	162	514	585	0.172892
MED1	MED16	39	110	154	0.173333
RSC30	RSC1	21	58	84	0.173554
MED9	SNF6	46	140	171	0.173585
JHD1	SMK1	4	12	15	0.173913
ITC1	SIR4	24	75	87	0.173913
YHP1	SIR2	24	77	85	0.173913
MIG3	YPR022C	4	12	15	0.173913
JHD1	YPR022C	4	12	15	0.173913
OTU1	STB2	4	13	14	0.173913
HAT2	HAP5	4	11	16	0.173913
HAL5DELSAT4	ADA2	63	190	235	0.174033
STE11	RSC30	15	43	58	0.174419
YPK1	RSC2	60	176	227	0.174927
URC2	YLR278C	7	23	24	0.175
MSI1	HST1	28	83	105	0.175
PHO4	RFX1	7	23	24	0.175
MBF1	SSN2	7	20	27	0.175
ISW1	SWD3	24	72	89	0.175182
SPT3	SNF6	48	151	171	0.175182
PHO4	ADR1	13	37	50	0.175676
CCR4	PTC1DELPPH3	148	460	530	0.175772
IES3	EAF7	19	57	70	0.175926
SPT20	CCR4	136	449	460	0.175938
MED20	SPT3	44	143	151	0.176
MED9	MED16	44	140	154	0.176
YHP1	SIR3	25	77	90	0.176056
YOX1	HIR1	3	10	10	0.176471
ITC1	SIR2	24	75	85	0.176471
RAD6	PTC1	81	267	273	0.176471
NPL6	IES6	93	300	320	0.176471
KSS1DELFUS3DELHOG1	CKA2	25	80	86	0.177305
SNF6	RSC2	60	171	227	0.177515
HAL5DELSAT4	MED2	66	190	246	0.178378
YER184C	HAA1	10	31	35	0.178571
MSI1	RFM1	30	83	115	0.178571
OTU1	MBF1	5	13	20	0.178571
ITC1	SIR3	25	75	90	0.178571
STB2	SOK2	5	14	19	0.178571
HFI1	TUP1	159	440	609	0.178652
SNF6	HSL1DELCLA4	57	171	205	0.178683
MED16	SNF2	49	154	169	0.178832
PPR1	PHO4	7	23	23	0.179487
PHO4	YML081W	7	23	23	0.179487
YHP1	SIR4	25	77	87	0.179856
BCK1DELPTP3	ELM1	11	35	37	0.180328
SPT7	MED15	109	320	393	0.180464
CAC2	SNF2	47	138	169	0.180769
MED3	SWI3	55	178	181	0.180921
YHP1	STP2	26	77	92	0.181818
HAT2	ZDS1	4	11	15	0.181818
RDR1	SKO1	4	12	14	0.181818
STE11	LDB7	14	43	48	0.181818
HAT2	YAP3	4	11	15	0.181818
SNT2	SEF1	4	10	16	0.181818
STE7	RSC30	16	46	58	0.181818
HIR1	YPR196W	4	10	16	0.181818
RDR1	STB2	4	12	14	0.181818
VPS71	EAF5	6	18	21	0.181818
GSM1	CHA4	6	19	20	0.181818
JHD1	SKO1	4	12	14	0.181818
YGR067C	YER130C	6	18	21	0.181818
YDR049W	MBF1	6	19	20	0.181818
SNF2	GCN5	59	169	214	0.182099
LDB7	ITC1	19	48	75	0.182692
RSC1	MED1	30	84	110	0.182927
SWD3	HST1	30	89	105	0.182927
MIH1DELELM1	NOT4	216	636	759	0.183206
SSN2	ARG80	9	27	31	0.183673
SPT2	MIG1	9	28	30	0.183673
PHO85	HAL5DELSAT4	54	158	190	0.183673
MED16	SWI3	52	154	181	0.183746
CKA2	SOK2	32	86	120	0.183908
MED2	SPT7	88	246	320	0.1841
CHA4	NNF2	7	20	25	0.184211
HOG1	PPR1	7	22	23	0.184211
CHA4	STP4	7	20	25	0.184211
SNF6	PTP2DELPTP3	57	171	195	0.184466
SPT8	SNF5	41	100	163	0.184685
SPT3	SNF5	49	151	163	0.184906
ZAP1	RDS1	5	14	18	0.185185
MIG3	MBF1	5	12	20	0.185185
HAP4	PHO4	10	27	37	0.185185
RGT1	SWI5	5	13	19	0.185185
NOT3	DAL81	5	14	18	0.185185
STB2	RDS1	5	14	18	0.185185
UGA3	RPI1	5	15	17	0.185185
YFL052W	YDR266C	5	12	20	0.185185
MIG3	YDR266C	5	12	20	0.185185
NOT3	RDS1	5	14	18	0.185185
STB2	DAL81	5	14	18	0.185185
NOT3	YGR067C	5	14	18	0.185185
SPT7	HFI1	103	320	339	0.185252
MED1	SOK2	36	110	120	0.185567
MED1	EAF1	39	110	139	0.185714
MSI1	ASF1	29	83	102	0.185897
CRZ1	MIG1	8	21	30	0.186047
YDR266C	YER184C	8	20	31	0.186047
AFT2	MIG1	8	21	30	0.186047
SWD3	RFM1	32	89	115	0.186047
RTT109	PTC1	78	224	273	0.186158
STE7	ITC1	19	46	75	0.186275
SPT2	RGM1	11	28	42	0.186441
ZAP1	YLR278C	6	14	24	0.1875
NOT3	CAF40	6	19	19	0.1875
TUP1	NOT4	216	609	759	0.1875
UGA3	PPR1	6	15	23	0.1875
YHP1	YAP7	6	17	21	0.1875
RPI1	GAT3	6	17	21	0.1875
SNF6	HAL5DELSAT4	57	171	190	0.1875
NGG1	RAD6	78	226	267	0.187952
TUP1	MIH1DELELM1	197	609	636	0.187977
STE7	FUS3	16	46	55	0.188235
ELM1	BCK1DELCLA4	13	37	45	0.188406
HAL5DELSAT4	SNF12	66	190	226	0.188571
STE7	KSS1DELFUS3DELHOG1	20	46	80	0.188679
SPT2	CUP2	10	28	35	0.188679
RSC1	CKA2	27	84	86	0.188811
SNF2	MED2	66	169	246	0.189112
AFT2	PHO4	7	21	23	0.189189
YER130C	URC2	7	21	23	0.189189
MED15	SPT20	134	393	449	0.189266
SLT2DELPTP3	CKA2	25	71	86	0.189394
ADA2	RAD6	80	235	267	0.189573
SPT2	CBF1	11	28	41	0.189655
SSN2	RGM1	11	27	42	0.189655
STE7	LDB7	15	46	48	0.189873
MED5	IES3	15	37	57	0.189873
MED9	ADA2	60	140	235	0.190476
KSS1	FLO8	12	34	41	0.190476
YDR049W	ARG80	8	19	31	0.190476
MIG3	DOT6	4	12	13	0.190476
SUT2	DOT6	4	12	13	0.190476
SIP3	NOT3	4	11	14	0.190476
MIG3	OTU1	4	12	13	0.190476
PBS2DELPTK2	DUN1DELPPH3	24	72	78	0.190476
STB3	SSN3	4	11	14	0.190476
MED3	HAL5DELSAT4	59	178	190	0.190939
GAT3	HAA1	9	21	35	0.191489
HFI1	SIN4	123	339	426	0.191589
PBS2DELPTK2	ASF1	28	72	102	0.191781
RAD6	BUR2	99	267	348	0.19186
STE11	ITC1	19	43	75	0.191919
DUN1DELPPH3	ASF1	29	78	102	0.192053
STB2	YHP1	5	14	17	0.192308
NOT3	YHP1	5	14	17	0.192308
ZAP1	YHP1	5	14	17	0.192308
NOT3	RPI1	5	14	17	0.192308
RDR1	SWI5	5	12	19	0.192308
SSN2	CUP2	10	27	35	0.192308
RAD6	VPS15	100	267	353	0.192308
MIG3	NRG1	5	12	19	0.192308
RDR1	NRG1	5	12	19	0.192308
FUS3DELKSS1	LDB7	15	45	48	0.192308
SNF5	MED3	55	163	178	0.192308
PHD1	SWI5	5	12	19	0.192308
GCN5	SNF12	71	214	226	0.192412
CAC2	HAL5DELSAT4	53	138	190	0.192727
SNF5	SNF6	54	163	171	0.192857
SSN2	CBF1	11	27	41	0.192982
RAD6	PAF1	116	267	449	0.193333
STB2	URC2	6	14	23	0.193548
RTT107	ISW1	6	15	22	0.193548
STB2	YML081W	6	14	23	0.193548
RDS1	YDR049W	6	18	19	0.193548
YAP3	ISW1	6	15	22	0.193548
YHP1	CHA4	6	17	20	0.193548
RTG3	STP1	19	46	71	0.193878
BAS1	SPT4	46	122	161	0.194093
RSC2	IES6	89	227	320	0.194323
SMK1	SPT2	7	15	28	0.194444
AFT2	HOG1	7	21	22	0.194444
SWD3	SUM1	35	89	126	0.194444
SPT20	SFP1	159	439	536	0.194853
IES3	RSC1	23	57	84	0.194915
SIF2	RSC1	16	35	63	0.195122
YDR266C	SRB8	8	20	29	0.195122
YLR278C	STP4	8	24	25	0.195122
RGM1	MAC1	17	42	62	0.195402
ULS1	CAD1	26	64	95	0.195489
SSN2	SPT2	9	27	28	0.195652
FUS3DELKSS1	SLT2DELPTP3	19	45	71	0.195876
STP4	SIR1	12	25	48	0.196721
SPT20	TUP1	174	449	609	0.196833
MED18	MED3	45	95	178	0.197368
RTF1	ADA2	61	135	235	0.197411
MIH1DELELM1	SSN6	266	636	977	0.197476
HSL1DELCLA4	CDK8	93	205	358	0.197872
SET1	ISW1	21	55	72	0.198113
SOK2	MED9	43	120	140	0.198157
RTT106	ITC1	23	64	75	0.198276
MED15	HFI1	138	393	440	0.198561
SSN2	WTM2	10	27	33	0.2
NNF2	FLO8	11	25	41	0.2
RIM11	RIM15	4	11	13	0.2
CUP9	ZDS1	5	15	15	0.2
GCN4	PGD1	10	29	31	0.2
SUT2	JHD1	4	12	12	0.2
NGG1	HFI1	111	226	440	0.2
STP4	CUP2	10	25	35	0.2
RFX1	HDA1	9	24	30	0.2
ARP6	YAF9	11	24	42	0.2
YPR022C	GAT3	6	15	21	0.2
YFL052W	JHD1	4	12	12	0.2
HAT2	RGT1	4	11	13	0.2
MIG3	YLR278C	6	12	24	0.2
SUT2	RDR1	4	12	12	0.2
YHP1	YDR049W	6	17	19	0.2
SKO1	HOG1	6	14	22	0.2
STB4	OTU1	4	11	13	0.2
MIG3	RDR1	4	12	12	0.2
GAT3	WTM2	9	21	33	0.2
STB2	YPR196W	5	14	16	0.2
ARG80	SIF2	11	31	35	0.2
YER130C	SSN2	8	21	27	0.2
RPI1	ARG80	8	17	31	0.2
URC2	YER184C	9	23	31	0.2
GCN5	SPT7	89	214	320	0.2
ZAP1	YPR196W	5	14	16	0.2
RPI1	STP4	7	17	25	0.2
RTF1	CDC73	61	135	231	0.2
SMK1	YPR022C	5	15	15	0.2
NOT3	YPR196W	5	14	16	0.2
SWI5	GCN4	8	19	29	0.2
SPT3	SNF12	63	151	226	0.200637
CKA2	SNF6	43	86	171	0.200935
MED16	MED2	67	154	246	0.201201
ULS1	SAS3	27	64	97	0.201493
NOT4	SSN6	292	759	977	0.202216
SOK2	PTP2DELPTP3	53	120	195	0.20229
WTM2	SWI4	17	33	68	0.202381
SWI3	MED2	72	181	246	0.202817
SNF6	SPT7	83	171	320	0.203431
MED18	SPT8	33	95	100	0.203704
NUT1	SIF2	10	24	35	0.204082
SPT2	YER184C	10	28	31	0.204082
PTP2DELPTP3	NPL6	84	195	300	0.20438
RSC2	PTC1DELPTC2	118	227	468	0.204506
YLR278C	SRB8	9	24	29	0.204545
PBS2DELPTK2	SIR4	27	72	87	0.204545
STP4	SPT2	9	25	28	0.204545
YGR067C	CUP2	9	18	35	0.204545
YDR266C	SSN2	8	20	27	0.205128
RDS1	SRB8	8	18	29	0.205128
CTI6	PHO23	31	59	123	0.205298
DOT6	SPT2	7	13	28	0.205882
SET2	EAF3	7	20	21	0.205882
DAL81	PPR1	7	18	23	0.205882
NRG1	HOG1	7	19	22	0.205882
OAF1	PHO4	7	18	23	0.205882
YGR067C	PPR1	7	18	23	0.205882
SWI5	ISW1	7	19	22	0.205882
DAL81	YML081W	7	18	23	0.205882
PBS2DELPTK2	KSS1DELFUS3DELHOG1	26	72	80	0.206349
CUP2	CBF1	13	35	41	0.206349
NPL6	PTC1DELPPH3	142	300	530	0.206395
SNF5	MED2	70	163	246	0.20649
SMK1	YDR266C	6	15	20	0.206897
RGT1	ISW1	6	13	22	0.206897
NOT3	YER130C	6	14	21	0.206897
SMK1	MBF1	6	15	20	0.206897
SPT3	SNF2	55	151	169	0.207547
VPS15	MIH1DELELM1	170	353	636	0.20757
MED20	MED2	67	143	246	0.208075
STB2	YPR022C	5	14	15	0.208333
YFL052W	YHP1	5	12	17	0.208333
STB5	RTT107	5	14	15	0.208333
STB5	CUP9	5	14	15	0.208333
NOT3	UGA3	5	14	15	0.208333
YCK3	BCK1DELPTP3	10	23	35	0.208333
SNT2	YDR049W	5	10	19	0.208333
OTU1	SEF1	5	13	16	0.208333
GAL11	CUP9	5	14	15	0.208333
TUP1	ARK1DELPRK1	269	609	947	0.209013
RSC30	ITC1	23	58	75	0.209091
EAF7	CKA2	27	70	86	0.209302
UME1	STP1	18	33	71	0.209302
STE11	FUS3	17	43	55	0.209877
HSL1DELCLA4	RAD6	82	205	267	0.210256
YPR022C	ARG80	8	15	31	0.210526
SNT2	DOT6	4	10	13	0.210526
STB4	SUT2	4	11	12	0.210526
RIM11	CMK2	4	11	12	0.210526
HAT2	PHD1	4	11	12	0.210526
YKL222C	RDS2	4	11	12	0.210526
RSC2	RAD6	86	227	267	0.210784
CTI6	RXT2	31	59	119	0.210884
SPT10	SNF6	177	462	553	0.211217
PTC1DELPTC2	NOT4	214	468	759	0.211254
MED31	SPT8	30	72	100	0.211268
SOK2	RTT109	60	120	224	0.211268
GAT3	RGM1	11	21	42	0.211538
SNF6	RTT109	69	171	224	0.211656
MED18	SPT3	43	95	151	0.211823
YPR022C	NNF2	7	15	25	0.212121
DAL81	HOG1	7	18	22	0.212121
SUT2	SPT2	7	12	28	0.212121
IES2	MED9	42	100	140	0.212121
YGR067C	HOG1	7	18	22	0.212121
SPT4	SNF5	81	161	301	0.212598
HSL1DELCLA4	PTC1DELPTC2	118	205	468	0.212613
SNF5	SPT10	134	301	462	0.213037
SPT4	HFI1	88	161	339	0.213592
YAP3	SWI5	6	15	19	0.214286
URC2	SPT2	9	23	28	0.214286
YOX1	YLR278C	6	10	24	0.214286
YDR266C	ARG80	9	20	31	0.214286
SIP3	PPR1	6	11	23	0.214286
PTC1DELPTC2	SSN6	255	468	977	0.214286
SNF5	CST6	163	301	620	0.21504
YER184C	ARG80	11	31	31	0.215686
YDR266C	RGM1	11	20	42	0.215686
MBF1	RGM1	11	20	42	0.215686
ISW2	ITC1	19	32	75	0.215909
SEF1	GCN4	8	16	29	0.216216
YDR266C	STP4	8	20	25	0.216216
GAT3	YLR278C	8	21	24	0.216216
SIR2	SNF2	117	230	428	0.216266
CTI6	EAF7	23	59	70	0.216981
PBS2DELPTK2	SIR2	28	72	85	0.217054
MED16	SNF6	58	154	171	0.217228
JHD1	YPR196W	5	12	16	0.217391
STP4	ARG80	10	25	31	0.217391
GAT3	CUP2	10	21	35	0.217391
YOX1	RDS1	5	10	18	0.217391
SUT2	SEF1	5	12	16	0.217391
VPS15	TUP1	172	353	609	0.217722
STE11	KSS1DELFUS3DELHOG1	22	43	80	0.217822
PBS2DELPTK2	SIR3	29	72	90	0.218045
SMK1	YLR278C	7	15	24	0.21875
SIF2	SNT1	7	18	21	0.21875
STE20	LDB7	14	30	48	0.21875
SNT1	LEO1	9	21	29	0.219512
SNF5	SPT7	87	163	320	0.219697
YDR266C	FLO8	11	20	41	0.22
IES2	RSC2	59	100	227	0.220149
ARG80	FLO8	13	31	41	0.220339
NPL6	VPS15	118	300	353	0.220561
SPT3	SWI3	60	151	181	0.220588
MED16	MED3	60	154	178	0.220588
ADA2	HFI1	122	235	440	0.220615
STE20	ITC1	19	30	75	0.22093
YER184C	SWI4	18	31	68	0.222222
HSL1DELCLA4	RTT109	78	205	224	0.222222
HAT2	ISW1	6	11	22	0.222222
CRZ1	PPR1	8	21	23	0.222222
SMK1	RDS1	6	15	18	0.222222
RPI1	SSN2	8	17	27	0.222222
YOX1	SUT2	4	10	12	0.222222
MSI1	RLF2	10	27	28	0.222222
SNT2	YFL052W	4	10	12	0.222222
SNT2	URC2	6	10	23	0.222222
STB2	NRG1	6	14	19	0.222222
HIR1	MIG3	4	10	12	0.222222
YOX1	JHD1	4	10	12	0.222222
YDR049W	STP4	8	19	25	0.222222
AFT2	PPR1	8	21	23	0.222222
RIM11	BCK1	4	11	11	0.222222
SPT8	SNF2	49	100	169	0.222727
SPT3	SIN4	107	161	426	0.222917
SDS3	SPT10	118	185	462	0.223062
PTC1DELPPH3	TUP1	208	530	609	0.223416
YPK1	NPL6	87	176	300	0.22365
HSL1DELCLA4	RSC2	79	205	227	0.223796
PTC1DELPTC2	TUP1	197	468	609	0.223864
PTC1DELPTC2	MIH1DELELM1	202	468	636	0.223947
FAB1	ELM1	13	34	37	0.224138
SPT8	MED3	51	100	178	0.22467
NPL6	PTC1DELPTC2	141	300	468	0.22488
YPR022C	KSS1	9	15	34	0.225
YER130C	SPT2	9	21	28	0.225
NGG1	SPT20	124	226	449	0.225045
SIR2	SPT20	123	230	439	0.225275
MED9	RTT109	67	140	224	0.225589
YPR022C	URC2	7	15	23	0.225806
YHP1	GAT3	7	17	21	0.225806
STB2	YLR278C	7	14	24	0.225806
CDK8	SSN6	246	358	977	0.225895
SWI3	NGG1	75	181	226	0.225904
HAA1	CAD1	24	35	95	0.226415
SNF6	ADA2	75	171	235	0.226586
NGG1	SPT7	101	226	320	0.226966
SWI3	ADA2	77	181	235	0.227139
OTU1	SKO1	5	13	14	0.227273
MIG3	SMK1	5	12	15	0.227273
YFL052W	YPR022C	5	12	15	0.227273
YOX1	RPI1	5	10	17	0.227273
PHD1	RTT107	5	12	15	0.227273
DOT6	STB2	5	13	14	0.227273
IES3	MED1	31	57	110	0.227941
SNF2	ADA2	75	169	235	0.227964
YDR049W	YLR278C	8	19	24	0.228571
CRZ1	HOG1	8	21	22	0.228571
RDS1	STP4	8	18	25	0.228571
PTC1DELPPH3	NOT4	240	530	759	0.228789
YPK1	HSL1DELCLA4	71	176	205	0.229032
YHP1	RGM1	11	17	42	0.229167
SIR2	TUP1	116	230	391	0.229703
ELM1	EAF7	20	37	70	0.229885
DOT6	NRG1	6	13	19	0.230769
YHP1	ARG80	9	17	31	0.230769
SIP3	AFT2	6	11	21	0.230769
UGA3	UME1	9	15	33	0.230769
YDR266C	SPT2	9	20	28	0.230769
CHK1	IRE1	6	12	20	0.230769
SWI3	SPT10	160	391	462	0.23088
IES2	ARP8	40	100	113	0.231214
SET1	BRE1	35	55	131	0.231788
MBF1	WTM2	10	20	33	0.232558
HFI1	CST6	181	339	620	0.232648
SPT3	MED2	75	151	246	0.232919
YHP1	YDR266C	7	17	20	0.233333
WTM2	CBF1	14	33	41	0.233333
SDS3	SNF2	116	185	428	0.2334
SNF2	HAL5DELSAT4	68	169	190	0.233677
YPK1	PTC1DELPTC2	122	176	468	0.233716
YHP1	CBF1	11	17	41	0.234043
SPT10	SFP1	190	462	536	0.235149
PTC1DELPPH3	MIH1DELELM1	222	530	636	0.235169
YHP1	NNF2	8	17	25	0.235294
NRG1	PHO4	8	19	23	0.235294
YDR049W	URC2	8	19	23	0.235294
CST6	SOK2	44	111	120	0.235294
VPS72	HTZ1	17	21	68	0.236111
PTC1DELPPH3	SSN6	288	530	977	0.236259
KIN3	FAB1	13	34	34	0.236364
IES2	RTT109	62	100	224	0.236641
SWI3	HAL5DELSAT4	71	181	190	0.236667
IXR1	SPT10	116	144	462	0.236735
NRG1	SPT2	9	19	28	0.236842
ADA2	SPT20	131	235	449	0.23689
CKA2	RSC2	60	86	227	0.237154
SIR3	SPT20	111	140	439	0.237179
PTP2DELPTP3	PTC1DELPPH3	139	195	530	0.237201
PTC1	CDK8	121	273	358	0.237255
NNF2	SIR1	14	25	48	0.237288
SPT8	SWI3	54	100	181	0.237885
ASF1	HSL1DELCLA4	59	102	205	0.237903
HAT2	RTT107	5	11	15	0.238095
RPI1	SIF2	10	17	35	0.238095
SUT2	SKO1	5	12	14	0.238095
PHD1	STB5	5	12	14	0.238095
SUT2	STB2	5	12	14	0.238095
GAT3	ARG80	10	21	31	0.238095
YOX1	YPR196W	5	10	16	0.238095
YHP1	CUP2	10	17	35	0.238095
RTT109	VPS15	111	224	353	0.238197
SNF2	NGG1	76	169	226	0.238245
CAC1	ASF1	36	85	102	0.238411
FUS3DELKSS1	SIR3	26	45	90	0.238532
CBF1	SWI4	21	41	68	0.238636
FLO8	SWI4	21	41	68	0.238636
ADA2	SPT7	107	235	320	0.238839
YCK3	FAB1	11	23	34	0.23913
SNF12	ADA2	89	226	235	0.239247
MED20	MED3	62	143	178	0.239382
SIR2	SWI3	120	230	391	0.239521
SMK1	YPR196W	6	15	16	0.24
SUT2	YDR049W	6	12	19	0.24
YFL052W	YDR049W	6	12	19	0.24
SNF6	NGG1	77	171	226	0.240625
NOT4	ARK1DELPRK1	331	759	947	0.240727
RSC30	HTL1	33	58	112	0.240876
STB5	ISW1	7	14	22	0.241379
YFL052W	YLR278C	7	12	24	0.241379
YER184C	CBF1	14	31	41	0.241379
HSL1DELCLA4	PTC1	93	205	273	0.241558
TUP1	SPT10	166	391	462	0.24163
STE7	PBS2DELPTK2	23	46	72	0.242105
MAC1	SAS3	31	62	97	0.242188
OAF1	PPR1	8	18	23	0.242424
YPR196W	STP4	8	16	25	0.242424
IES2	MED1	41	100	110	0.242604
SDS3	SPT20	122	185	439	0.243028
SWI3	SPT7	98	181	320	0.243176
GAT3	STP4	9	21	25	0.243243
YPR022C	YER184C	9	15	31	0.243243
ARP6	HTZ1	18	24	68	0.243243
RSC2	PTC1	98	227	273	0.243781
YHP1	KSS1	10	17	34	0.243902
MBF1	ARG80	10	20	31	0.243902
STP4	YER184C	11	25	31	0.244444
MED1	CDK8	92	110	358	0.244681
SPT2	WTM2	12	28	33	0.244898
SNF12	NGG1	89	226	226	0.245179
FUS3DELKSS1	SIR4	26	45	87	0.245283
CDC73	PAF1	134	231	449	0.245421
BCK1DELCLA4	SLT2DELCLA4	27	45	92	0.245455
IXR1	SPT20	115	144	439	0.245726
HST1	HST1	29	42	105	0.245763
IXR1	SNF2	113	144	428	0.246187
SPT3	MED3	65	151	178	0.246212
IES2	IES6	83	100	320	0.246291
SIR2	SPT10	137	230	462	0.246847
MED9	CDK8	99	140	358	0.24812
PIP2	ISW2	34	47	124	0.248175
CKA2	IES2	37	86	100	0.248322
MAC1	IXR1	41	62	144	0.248485
FUS3DELKSS1	SIR2	26	45	85	0.25
YPR022C	YDR266C	7	15	20	0.25
RDS1	SSN2	9	18	27	0.25
YOX1	YDR266C	6	10	20	0.25
HAT2	GAL11	5	11	14	0.25
MED9	PTP2DELPTP3	67	140	195	0.25
MBF1	CHA4	8	20	20	0.25
SUT2	OTU1	5	12	13	0.25
YHP1	WTM2	10	17	33	0.25
YFL052W	RDS1	6	12	18	0.25
RPI1	YGR067C	7	17	18	0.25
RPI1	SPT2	9	17	28	0.25
YDR266C	CUP2	11	20	35	0.25
YPR196W	YDR049W	7	16	19	0.25
YFL052W	OTU1	5	12	13	0.25
YOX1	MBF1	6	10	20	0.25
OAF1	HOG1	8	18	22	0.25
MIG3	SPT2	8	12	28	0.25
RDR1	SPT2	8	12	28	0.25
LDB7	HTL1	32	48	112	0.25
YLR278C	CBF1	13	24	41	0.25
YFL052W	SPT2	8	12	28	0.25
RSC2	VPS15	116	227	353	0.25
CMK2	PTK2	5	12	13	0.25
CAD1	HFI1	87	95	339	0.25072
SNF5	SIN4	146	301	426	0.251291
SPT3	SPT7	95	151	320	0.25266
SSK2	PBS2DELPTK2	20	27	72	0.253165
MED16	SNF12	77	154	226	0.254125
IES3	CKA2	29	57	86	0.254386
MAC1	SIR3	41	62	140	0.254658
RSC2	NPL6	107	227	300	0.254762
DAL81	RTG3	13	18	46	0.254902
SNF12	SPT7	111	226	320	0.255172
MED1	RTT109	68	110	224	0.255639
PTP2DELPTP3	PTC1DELPTC2	135	195	468	0.255682
AFT2	UME1	11	21	33	0.255814
MBF1	KSS1	11	20	34	0.255814
CRZ1	UME1	11	21	33	0.255814
GSM1	HAA1	11	19	35	0.255814
HFI1	SNF6	182	339	553	0.256338
MED5	MED1	30	37	110	0.25641
ASF1	CAC2	49	102	138	0.256545
PTC1	NPL6	117	273	300	0.256579
BAS1	SIR2	72	122	230	0.257143
SWD3	BRE1	45	89	131	0.257143
GSM1	STP4	9	19	25	0.257143
GSM1	NNF2	9	19	25	0.257143
RDS1	GAT3	8	18	21	0.258065
FUS3DELKSS1	PBS2DELPTK2	24	45	72	0.258065
YPR022C	YLR278C	8	15	24	0.258065
SWC3	SWC5	8	13	26	0.258065
IXR1	TUP1	110	144	391	0.258824
WTM2	CUP2	14	33	35	0.259259
STB2	MBF1	7	14	20	0.259259
STE20	PBS2DELPTK2	21	30	72	0.259259
SIR1	SDS3	48	48	185	0.259459
SNF2	SPT7	101	169	320	0.260309
MED1	PTP2DELPTP3	63	110	195	0.260331
LGE1	RTF1	44	78	135	0.260355
YHP1	FLO8	12	17	41	0.26087
RPI1	FLO8	12	17	41	0.26087
NNF2	MAC1	18	25	62	0.26087
KSS1	SIR1	17	34	48	0.261538
FLO8	CBF1	17	41	41	0.261538
GSM1	KSS1	11	19	34	0.261905
YDR266C	WTM2	11	20	33	0.261905
SWR1	HTZ1	21	33	68	0.2625
MIG3	SUT2	5	12	12	0.263158
YFL052W	SUT2	5	12	12	0.263158
YOX1	STB2	5	10	14	0.263158
SDS3	TUP1	120	185	391	0.263158
MIG3	YFL052W	5	12	12	0.263158
KSS1	MAC1	20	34	62	0.263158
PTP2DELPTP3	RSC2	88	195	227	0.263473
CRZ1	RTG3	14	21	46	0.264151
SIR3	TUP1	111	140	391	0.264286
MIH1DELELM1	ARK1DELPRK1	331	636	947	0.264377
YPR196W	SSN2	9	16	27	0.264706
YPR022C	SPT2	9	15	28	0.264706
CAD1	SNF5	83	95	301	0.265176
YER130C	CBF1	13	21	41	0.265306
SWI3	CST6	212	391	620	0.265332
SPT4	SIR2	82	161	230	0.265372
PTP2DELPTP3	RTT109	88	195	224	0.265861
SDC1	SWD3	25	30	89	0.265957
ARP8	IES6	91	113	320	0.266082
HAA1	FLO8	16	35	41	0.266667
YPR196W	CBF1	12	16	41	0.266667
YPR196W	FLO8	12	16	41	0.266667
YHP1	YER130C	8	17	21	0.266667
MED1	RSC2	71	110	227	0.266917
SNF5	SNF12	82	163	226	0.267101
HSL1DELCLA4	VPS15	118	205	353	0.268182
NRG1	UME1	11	19	33	0.268293
GAT3	YER184C	11	21	31	0.268293
RPI1	CUP2	11	17	35	0.268293
CDK8	PTC1DELPTC2	175	358	468	0.268817
YLR278C	RGM1	14	24	42	0.269231
STB2	YDR049W	7	14	19	0.269231
SEF1	PGD1	10	16	31	0.27027
YDR049W	SPT2	10	19	28	0.27027
SIR3	SWI3	113	140	391	0.270335
UGA3	RTG3	13	15	46	0.270833
MBF1	FLO8	13	20	41	0.270833
SWR1	YAF9	16	33	42	0.271186
SDS3	SWI3	123	185	391	0.271523
RDR1	SEF1	6	12	16	0.272727
NRG1	PPR1	9	19	23	0.272727
YFL052W	YPR196W	6	12	16	0.272727
STB2	SPT2	9	14	28	0.272727
RGT1	RTT107	6	13	15	0.272727
HFI1	TUP1	157	339	391	0.273997
RSC2	CDK8	126	227	358	0.27451
YLR278C	FLO8	14	24	41	0.27451
BCK1DELCLA4	SLT2DELPTP3	25	45	71	0.274725
TUP1	CST6	218	391	620	0.274905
PTC1	VPS15	135	273	353	0.274949
DAL81	UME1	11	18	33	0.275
YLR278C	SSN2	11	24	27	0.275
MBF1	YER184C	11	20	31	0.275
YPR196W	CUP2	11	16	35	0.275
FUS3DELKSS1	KSS1DELFUS3DELHOG1	27	45	80	0.27551
YPR196W	GAT3	8	16	21	0.275862
SWC3	ARP6	8	13	24	0.275862
RPI1	MBF1	8	17	20	0.275862
WTM2	FLO8	16	33	41	0.275862
IES3	IES2	34	57	100	0.276423
CAD1	BAS1	47	95	122	0.276471
STE20	SIR3	26	30	90	0.276596
IXR1	SWI3	116	144	391	0.27685
YER130C	MAC1	18	21	62	0.276923
RTT106	ASF1	36	64	102	0.276923
SPT3	TUP1	120	161	391	0.277778
SWC3	SWR1	10	13	33	0.277778
YER130C	STP4	10	21	25	0.277778
ACA1	PHD1	5	11	12	0.277778
NGG1	PHO23	5	11	12	0.277778
STE20	SIR2	25	30	85	0.277778
RTT106	CAC2	44	64	138	0.278481
SFP1	CST6	252	536	620	0.278761
RGM1	SWI4	24	42	68	0.27907
YLR278C	ARG80	12	24	31	0.27907
MBF1	CUP2	12	20	35	0.27907
YLR278C	YER184C	12	24	31	0.27907
YAF9	HTZ1	24	42	68	0.27907
SIR2	SNF5	116	230	301	0.279518
YER184C	WTM2	14	31	33	0.28
ARG80	WTM2	14	31	33	0.28
SPT3	SNF2	129	161	428	0.280435
YGR067C	PHO4	9	18	23	0.28125
OTU1	SPT2	9	13	28	0.28125
CDK8	PTC1DELPPH3	195	358	530	0.281385
SPT4	SDS3	76	161	185	0.281481
RPI1	WTM2	11	17	33	0.282051
LGE1	BRE1	46	78	131	0.282209
RPI1	RGM1	13	17	42	0.282609
RDS1	CBF1	13	18	41	0.282609
RDS1	FLO8	13	18	41	0.282609
YLR278C	CUP2	13	24	35	0.282609
SPT2	ARG80	13	28	31	0.282609
YPK1	PTC1	99	176	273	0.282857
SWC5	YAF9	15	26	42	0.283019
SNF12	HFI1	147	226	440	0.283237
ARK1DELPRK1	SSN6	425	947	977	0.283522
CDK8	TUP1	214	358	609	0.284197
BAS1	SDS3	68	122	185	0.284519
SIN4	SPT20	192	426	439	0.28529
YPR022C	YER130C	8	15	21	0.285714
PHD1	YAP3	6	12	15	0.285714
RGT1	STB5	6	13	14	0.285714
MBF1	NNF2	10	20	25	0.285714
YFL052W	SMK1	6	12	15	0.285714
STE20	SIR4	26	30	87	0.285714
VPS72	YAF9	14	21	42	0.285714
VPS15	ARK1DELPRK1	289	353	947	0.285856
SNF2	SPT10	198	428	462	0.286127
PTP2DELPTP3	VPS15	122	195	353	0.286385
RPI1	CBF1	13	17	41	0.288889
YPR196W	RGM1	13	16	42	0.288889
CDC73	CTR9	167	231	514	0.288927
PTP2DELPTP3	CDK8	124	195	358	0.289044
SPT3	SWI3	124	161	391	0.28972
YHP1	URC2	9	17	23	0.290323
YDR266C	MBF1	9	20	20	0.290323
BCK1DELPTP3	BCK1DELCLA4	18	35	45	0.290323
SAS5	SAS4	9	20	20	0.290323
SWC3	VPS71	7	13	18	0.291667
YER184C	MAC1	21	31	62	0.291667
JHD1	YDR049W	7	12	19	0.291667
GAT3	FLO8	14	21	41	0.291667
STE11	PBS2DELPTK2	26	43	72	0.292135
RDS1	CUP2	12	18	35	0.292683
VPS15	CDK8	161	353	358	0.292727
SNF12	SPT20	153	226	449	0.293103
HAA1	MAC1	22	35	62	0.293333
YOX1	YFL052W	5	10	12	0.294118
YOX1	MIG3	5	10	12	0.294118
HIR1	YFL052W	5	10	12	0.294118
ARG80	CUP2	15	31	35	0.294118
CRZ1	PHO4	10	21	23	0.294118
SNT2	SUT2	5	10	12	0.294118
PTP2DELPTP3	HSL1DELCLA4	91	195	205	0.294498
SIR1	SAS3	33	48	97	0.294643
URC2	KSS1	13	23	34	0.295455
SIR2	HFI1	130	230	339	0.296128
SWI3	SIN4	187	391	426	0.296825
GAT3	MAC1	19	21	62	0.296875
MBF1	SPT2	11	20	28	0.297297
YHP1	YER184C	11	17	31	0.297297
RPI1	YER184C	11	17	31	0.297297
SIR1	IXR1	44	48	144	0.297297
SAS3	SIR2	75	97	230	0.297619
CKA2	MED1	45	86	110	0.298013
SPT3	SPT20	138	161	439	0.298701
HOG1	PBS2DELPTK2	23	28	72	0.298701
CKA2	MED9	52	86	140	0.298851
SIN4	CST6	241	426	620	0.299379
DOT6	OTU1	6	13	13	0.3
YER130C	ARG80	12	21	31	0.3
SIW14	OCA1	6	11	15	0.3
SSN2	SRB8	13	27	29	0.302326
MBF1	URC2	10	20	23	0.30303
RTT109	RSC2	105	224	227	0.303468
ARG80	RGM1	17	31	42	0.303571
RXT2	RPD3	96	119	293	0.303797
VPS71	YAF9	14	18	42	0.304348
RDS1	RGM1	14	18	42	0.304348
HFI1	SPT10	187	339	462	0.30456
VPS15	PTC1DELPTC2	192	353	468	0.305246
YPR196W	ARG80	11	16	31	0.305556
HST1	SUM1	33	42	99	0.305556
YPK1	VPS15	124	176	353	0.306173
TUP1	SIN4	192	391	426	0.3072
SIP3	PHO4	8	11	23	0.307692
SNF2	SNF6	80	169	171	0.307692
MAC1	CAD1	37	62	95	0.308333
SPT4	SPT3	76	161	161	0.308943
TUP1	SPT20	196	391	439	0.309148
SIN4	SNF2	202	426	428	0.309816
SAS3	BAS1	52	97	122	0.311377
PHO23	RPD3	99	123	293	0.312303
VPS71	ARP6	10	18	24	0.3125
CKA2	PTP2DELPTP3	67	86	195	0.313084
GSM1	SIR1	16	19	48	0.313725
IXR1	SPT4	73	144	161	0.314655
YOX1	YPR022C	6	10	15	0.315789
YOX1	SMK1	6	10	15	0.315789
YFL052W	DOT6	6	12	13	0.315789
RTT109	CDK8	140	224	358	0.316742
CBF1	RGM1	20	41	42	0.31746
BUR2	CTR9	208	348	514	0.318043
STB2	SMK1	7	14	15	0.318182
SIP3	OAF1	7	11	18	0.318182
DOT6	SEF1	7	13	16	0.318182
PTC1DELPTC2	ARK1DELPRK1	343	468	947	0.319963
YPR022C	RDS1	8	15	18	0.32
STP4	FLO8	16	25	41	0.32
UGA3	OAF1	8	15	18	0.32
RPI1	YDR266C	9	17	20	0.321429
BAS1	SPT3	69	122	161	0.32243
MBF1	GAT3	10	20	21	0.322581
YDR266C	YER130C	10	20	21	0.322581
DAL81	PHO4	10	18	23	0.322581
MBF1	YER130C	10	20	21	0.322581
YHP1	YLR278C	10	17	24	0.322581
BAS1	IXR1	65	122	144	0.323383
SUM1	SUM1	55	99	126	0.323529
YHP1	SPT2	11	17	28	0.323529
SDS3	SNF5	119	185	301	0.324251
RDS1	ARG80	12	18	31	0.324324
MED9	RSC2	90	140	227	0.32491
SNF5	TUP1	170	301	391	0.32567
VPS15	PTC1DELPPH3	217	353	530	0.325826
SDS3	HFI1	129	185	339	0.326582
SIR3	HFI1	118	140	339	0.32687
HFI1	SWI3	180	339	391	0.327273
NHP10	IES3	21	28	57	0.328125
BRE2	SWD3	33	44	89	0.33
SIR3	SPT4	75	140	161	0.331858
SIR3	SNF5	110	140	301	0.332326
SPT20	SPT10	225	439	462	0.33284
SIP3	CRZ1	8	11	21	0.333333
YPR196W	YDR266C	9	16	20	0.333333
ACA1	RGT1	6	11	13	0.333333
YFL052W	MBF1	8	12	20	0.333333
MBF1	YLR278C	11	20	24	0.333333
YPR022C	RPI1	8	15	17	0.333333
CUP2	FLO8	19	35	41	0.333333
RGT1	YAP3	7	13	15	0.333333
URC2	NNF2	12	23	25	0.333333
BRE1	RTF1	67	131	135	0.336683
PTP2DELPTP3	PTC1	118	195	273	0.337143
CAD1	SIR2	82	95	230	0.337449
SUM1	RFM1	54	99	115	0.3375
IXR1	HFI1	122	144	339	0.33795
SNF6	SWI3	89	171	181	0.338403
STP4	MAC1	22	25	62	0.338462
HFI1	SNF2	194	339	428	0.338569
WTM2	RGM1	19	33	42	0.339286
LDB7	RSC30	27	48	58	0.341772
SUM1	HST1	52	99	105	0.342105
SNF5	SNF6	218	301	553	0.342767
TUP1	SNF6	241	391	553	0.342817
SWC5	HTZ1	24	26	68	0.342857
SIR1	SIR3	48	48	140	0.342857
STE7	SIR4	34	46	87	0.343434
BAS1	SIR3	67	122	140	0.34359
SPT3	SIR2	100	161	230	0.343643
TUP1	SNF2	210	391	428	0.344828
SDC1	BRE2	19	30	44	0.345455
YHP1	RDS1	9	17	18	0.346154
RLF2	CAC2	18	28	42	0.346154
STE7	SIR3	35	46	90	0.346535
YER184C	CUP2	17	31	35	0.346939
YPR022C	YPR196W	8	15	16	0.347826
YER130C	WTM2	14	21	33	0.35
SPT10	CST6	281	462	620	0.350811
MED31	MED20	56	72	143	0.352201
RDS1	SPT2	12	18	28	0.352941
YPK1	PTP2DELPTP3	97	176	195	0.354015
STE11	SIR4	34	43	87	0.354167
GAT3	YER130C	11	21	21	0.354839
YHP1	STP4	11	17	25	0.354839
FLO8	MAC1	27	41	62	0.355263
RCO1	SET2	27	29	74	0.355263
IXR1	SNF5	117	144	301	0.356707
RDS1	MBF1	10	18	20	0.357143
YLR278C	WTM2	15	24	33	0.357143
RDS1	YDR266C	10	18	20	0.357143
ARP6	SWR1	15	24	33	0.357143
UGA3	PHO4	10	15	23	0.357143
STE11	SIR3	35	43	90	0.357143
SIR1	MAC1	29	48	62	0.358025
DLS1	DPB4	9	14	20	0.36
YHP1	RPI1	9	17	17	0.36
UGA3	NRG1	9	15	19	0.36
HAA1	SIR1	22	35	48	0.360656
YPR196W	WTM2	13	16	33	0.361111
RDS1	YER184C	13	18	31	0.361111
SPT3	HFI1	133	161	339	0.362398
MED3	MED15	152	178	393	0.362768
YER130C	YLR278C	12	21	24	0.363636
SIP3	NRG1	8	11	19	0.363636
STE7	SIR2	35	46	85	0.364583
DUN1	ELM1	19	34	37	0.365385
YER130C	CUP2	15	21	35	0.365854
GCN5	NGG1	118	214	226	0.36646
RPI1	YLR278C	11	17	24	0.366667
PTC1DELPPH3	ARK1DELPRK1	397	530	947	0.367593
YFL052W	STB2	7	12	14	0.368421
SAS3	SDS3	76	97	185	0.368932
CAD1	SPT4	69	95	161	0.368984
BUR2	PAF1	215	348	449	0.369416
SNF5	HFI1	173	301	339	0.37045
URC2	STP4	13	23	25	0.371429
SWC5	SWR1	16	26	33	0.372093
RTT106	MSI1	40	64	83	0.373832
SWI3	SPT20	226	391	439	0.374172
BRE2	SET1	27	44	55	0.375
YPR196W	YHP1	9	16	17	0.375
YDR266C	YLR278C	12	20	24	0.375
SIR1	CAD1	39	48	95	0.375
SAP30	RPD3	123	157	293	0.376147
STE11	SIR2	35	43	85	0.376344
SWI3	SNF6	259	391	553	0.378102
SNF2	CST6	288	428	620	0.378947
NRG1	AFT2	11	19	21	0.37931
YPR022C	STP4	11	15	25	0.37931
GLN3	TAF14	27	42	56	0.380282
SNF5	SPT20	204	301	439	0.380597
SPT20	CST6	292	439	620	0.380704
STB5	YAP3	8	14	15	0.380952
SIP3	DAL81	8	11	18	0.380952
SIP3	YGR067C	8	11	18	0.380952
GCN5	ADA2	124	214	235	0.381538
YPR196W	YER184C	13	16	31	0.382353
YPR196W	MBF1	10	16	20	0.384615
UGA3	AFT2	10	15	21	0.384615
PBS2	PBS2DELPTK2	29	32	72	0.386667
SPT3	SNF5	129	161	301	0.387387
CMK2	RIM15	7	12	13	0.388889
RDR1	DOT6	7	12	13	0.388889
ACA1	STB5	7	11	14	0.388889
PHD1	RGT1	7	12	13	0.388889
RDR1	OTU1	7	12	13	0.388889
RXT2	SIN3	102	119	245	0.389313
OAF1	AFT2	11	18	21	0.392857
VPS71	VPS72	11	18	21	0.392857
RDS1	YER130C	11	18	21	0.392857
DAL81	AFT2	11	18	21	0.392857
SDC1	SET1	24	30	55	0.393443
SNF6	CST6	333	553	620	0.396429
IES5	NHP10	12	14	28	0.4
RPI1	RDS1	10	17	18	0.4
YPR022C	MBF1	10	15	20	0.4
YER130C	RGM1	18	21	42	0.4
PHO23	SIN3	106	123	245	0.40458
YLR278C	SPT2	15	24	28	0.405405
RTT106	CAC1	43	64	85	0.40566
MBF1	STP4	13	20	25	0.40625
RPI1	YER130C	11	17	21	0.407407
SAS3	SPT3	75	97	161	0.409836
SNF2	SNF12	115	169	226	0.410714
CHA4	GAT3	12	20	21	0.413793
SNF5	SWI3	203	301	391	0.415133
SWC3	VPS72	10	13	21	0.416667
IXR1	SIR2	110	144	230	0.416667
RDS1	WTM2	15	18	33	0.416667
SNF5	SNF2	215	301	428	0.418288
VPS71	SWC5	13	18	26	0.419355
YPR196W	SPT2	13	16	28	0.419355
SAS5	SAS2	21	24	47	0.42
VPS72	SWR1	16	21	33	0.421053
CAD1	SDS3	83	95	185	0.42132
SWI3	SNF12	121	181	226	0.423077
YGR067C	NRG1	11	18	19	0.423077
YPR196W	YER130C	11	16	21	0.423077
SWI3	SNF2	244	391	428	0.424348
MED18	MED20	71	95	143	0.42515
MSI1	CAC2	66	83	138	0.425806
SWD1	BRE2	26	43	44	0.42623
SNF6	SNF12	119	171	226	0.428058
MED1	MED9	75	110	140	0.428571
NRG1	CRZ1	12	19	21	0.428571
ARP6	SWC5	15	24	26	0.428571
SPT7	SPT20	231	320	449	0.429368
FLO8	RGM1	25	41	42	0.431034
RXT2	SDS3	97	119	203	0.431111
PTC1	PTC1DELPPH3	242	273	530	0.431373
SPT7	HFI1	230	320	440	0.433962
SAS3	IXR1	73	97	144	0.434524
UGA3	YGR067C	10	15	18	0.434783
SWD1	SWD3	40	43	89	0.434783
TUP1	SWI3	237	391	391	0.434862
SNF5	SWI3	105	163	181	0.439331
DEP1	RPD3	149	195	293	0.439528
OAF1	DAL81	11	18	18	0.44
OAF1	YGR067C	11	18	18	0.44
YGR067C	DAL81	11	18	18	0.44
SAS3	SPT4	79	97	161	0.441341
SPT3	SDS3	106	161	185	0.441667
SPT20	SNF6	304	439	553	0.44186
STE20	FUS3DELKSS1	23	30	45	0.442308
SNF5	SNF2	102	163	169	0.443478
SIP3	UGA3	8	11	15	0.444444
YGR067C	CRZ1	12	18	21	0.444444
OAF1	CRZ1	12	18	21	0.444444
ACA1	YAP3	8	11	15	0.444444
MIG3	STB2	8	12	14	0.444444
SAS3	SIR3	73	97	140	0.445122
CAD1	SPT3	79	95	161	0.446328
SSK2	HOG1	17	27	28	0.447368
VPS72	ARP6	14	21	24	0.451613
CUP2	RGM1	24	35	42	0.45283
YPR022C	YHP1	10	15	17	0.454545
PHO23	SDS3	102	123	203	0.455357
RXT2	DEP1	99	119	195	0.460465
STE20	STE7	24	30	46	0.461538
SAP30	SIN3	127	157	245	0.461818
FUS3DELKSS1	STE7	29	45	46	0.467742
YER184C	FLO8	23	31	41	0.469388
EAF3	RCO1	16	21	29	0.470588
BCK1DELPTP3	SLT2DELPTP3	34	35	71	0.472222
STP4	KSS1	19	25	34	0.475
SSK2	PBS2	19	27	32	0.475
YER130C	FLO8	20	21	41	0.47619
SIN4	SNF6	317	426	553	0.478852
DAL81	NRG1	12	18	19	0.48
YHP1	MBF1	12	17	20	0.48
OAF1	NRG1	12	18	19	0.48
SDS3	RPD3	161	203	293	0.480597
HFI1	SPT20	254	339	439	0.484733
TUP1	SSN6	518	609	977	0.485019
YER130C	YER184C	17	21	31	0.485714
SNF2	SNF6	321	428	553	0.486364
PTC1	PTC1DELPTC2	243	273	468	0.487952
YER184C	RGM1	24	31	42	0.489796
MED31	MED18	55	72	95	0.491071
STE11	FUS3DELKSS1	29	43	45	0.491525
SNF2	SPT20	286	428	439	0.492255
IXR1	SPT3	101	144	161	0.495098
IXR1	SDS3	109	144	185	0.495455
CAC1	CAC2	74	85	138	0.496644
SIR3	SPT3	100	140	161	0.497512
PHO23	DEP1	106	123	195	0.5
CRZ1	AFT2	14	21	21	0.5
YPR196W	RPI1	11	16	17	0.5
YGR067C	AFT2	13	18	21	0.5
SDS3	SIR2	139	185	230	0.503623
MED2	MED15	216	246	393	0.510638
NNF2	KSS1	20	25	34	0.512821
SET1	SWD3	49	55	89	0.515789
VPS72	SWC5	16	21	26	0.516129
STE20	STE11	25	30	43	0.520833
SDC1	SWD1	25	30	43	0.520833
CAD1	SAS3	66	95	97	0.52381
MSI1	CAC1	58	83	85	0.527273
HDA3	HDA2	32	44	48	0.533333
SDS3	SIN3	156	203	245	0.534247
CAD1	SIR3	82	95	140	0.535948
HOG1	PBS2	21	28	32	0.538462
DEP1	SIN3	154	195	245	0.538462
CAD1	IXR1	84	95	144	0.541935
MED3	MED2	150	178	246	0.547445
SIR3	SIR2	131	140	230	0.548117
RDS1	YLR278C	15	18	24	0.555556
SWD1	SET1	35	43	55	0.555556
SPT8	SPT3	91	100	151	0.56875
UGA3	DAL81	12	15	18	0.571429
NGG1	ADA2	169	226	235	0.578767
SAP30	SDS3	132	157	203	0.578947
PAF1	CTR9	355	449	514	0.583882
SAS4	SAS2	31	36	47	0.596154
SNF2	SWI3	131	169	181	0.598174
YPR196W	YLR278C	15	16	24	0.6
RXT2	SAP30	104	119	157	0.604651
HDA1	HDA3	33	43	44	0.611111
STP4	NNF2	19	25	25	0.612903
SIR3	IXR1	108	140	144	0.613636
SAS5	SAS4	23	24	36	0.621622
DAL81	CRZ1	15	18	21	0.625
SIN3	RPD3	208	245	293	0.630303
UGA3	CRZ1	14	15	21	0.636364
SAP30	DEP1	137	157	195	0.637209
PHO23	SAP30	109	123	157	0.637427
STE11	STE7	35	43	46	0.648148
PTC1DELPTC2	PTC1DELPPH3	399	468	530	0.66611
SIR3	SDS3	130	140	185	0.666667
HDA1	HDA2	37	43	48	0.685185
YPR196W	RDS1	14	16	18	0.7
DEP1	SDS3	165	195	203	0.708155
HFI1	SPT20	377	440	449	0.736328
SIR2	SIR3	75	85	90	0.75
SIR2	SIR4	74	85	87	0.755102
HST1	SUM1	101	105	126	0.776923
RXT2	PHO23	106	119	123	0.779412
SIR4	SIR3	81	87	90	0.84375
RFM1	SUM1	111	115	126	0.853846
HST1	RFM1	102	105	115	0.864407
