# Supplementary material
Source: publisher figshare collection journal article supplement (https://plos.figshare.com/articles/dataset/_/790268)
Supplement: Supplementary file 1 [file 1 › Table_S2.xlsx]

## Sheet: Table S2
Table S2 Known interactions downloaded from the SGD data set.
HDA1	——	VPS72
PHO85	——	PGD1
SAS3	——	ADA2
CSE2	——	SWI3
TAF14	——	SNF6
SSK2	——	PTP2
EAF1	——	SIR3
TAF14	——	RTT106
SWD1	——	SET1
RIM101	——	NUT1
CTK1	——	PBS2
CLA4	——	ELM1
RIM15	——	GLN3
MED1	——	SWC5
SDC1	——	GCR2
SNF1	——	PHO85
VPS71	——	ASF1
ARP6	——	RIC1
NUT1	——	CSE2
RAD6	——	VPS72
GCN5	——	HFI1
PTK2	——	BCK1
PBS2	——	SNF1
RIC1	——	CBF1
SIR3	——	RPD3
RPD3	——	RIM101
MED2	——	SWD1
PHO85	——	RIM15
CAF40	——	SSN2
SWC5	——	MED1
SPT2	——	SPT8
IES3	——	STB5
SDC1	——	HTZ1
STB5	——	BRE1
ISW1	——	ISW2
HFI1	——	GAL11
SOH1	——	SWI4
IXR1	——	SLT2
PHD1	——	FLO8
SIN3	——	SET2
SOH1	——	HDA2
CTK1	——	CRZ1
CBF1	——	NRG1
SEF1	——	SIN3
GAL11	——	SRB2
CDC73	——	FAB1
SRB2	——	SUS1
HTZ1	——	CHA4
TAF14	——	SAS3
SIT4	——	SWI4
CTI6	——	SPT4
SNF5	——	RTT109
IES2	——	FAB1
CBF1	——	UME1
PTK2	——	UME6
SIN4	——	BAS1
DOT6	——	JHD1
CBF1	——	DUN1
CCR4	——	SIN3
RTT106	——	SET2
ADA2	——	SPT8
HTL1	——	RSC1
SPT8	——	RXT2
SPT20	——	SRB5
SPT4	——	KIN3
PHO85	——	SLT2
MCK1	——	BRE1
CDC73	——	SWC5
RFX1	——	RXT2
VPS71	——	BRE2
SAP30	——	NGG1
IES2	——	MED1
EAF5	——	SDS3
MGA2	——	VPS72
HFI1	——	YAF9
HDA3	——	HDA2
SWI4	——	SUM1
SIN3	——	ELM1
RCO1	——	RIM101
VPS71	——	VMS1
SIN4	——	ISW2
SUS1	——	LGE1
MED2	——	SIR2
BRE1	——	AFT1
UME6	——	ARP6
SAT4	——	PTK2
CCR4	——	ARP8
PHO85	——	CRZ1
YAF9	——	LGE1
SIN3	——	SAS5
NGG1	——	SPT3
SPT8	——	RPD3
ASF1	——	SIR1
RTT107	——	EAF1
BRE2	——	SAP30
CKA2	——	SWI5
SWR1	——	LEO1
LGE1	——	SAS4
TUP1	——	HDA1
SPT8	——	ARP6
SDS3	——	SOH1
RPD3	——	GCR2
LGE1	——	VPS15
YAF9	——	EAF7
DAL81	——	STP2
SIW14	——	GLN3
SAP30	——	UME1
SIN3	——	CSE2
HAA1	——	SWI4
IXR1	——	MIG1
ASF1	——	CKA2
PPH3	——	NRG1
SPT2	——	RXT2
MCK1	——	CAC2
ITC1	——	SPT8
DOT6	——	SDS3
NHP10	——	DPB4
SRB2	——	VPS72
RPD3	——	SDC1
SNF6	——	TAF14
MED1	——	SGF73
MED1	——	LEO1
SIN3	——	LEO1
PHO85	——	MBF1
GAL4	——	SSN3
IXR1	——	GCR2
UME1	——	LEO1
RXT2	——	SIN3
SWC3	——	YAF9
DUN1	——	MCK1
DUN1	——	BRE1
SPT7	——	SUS1
RCO1	——	RFX1
SAP30	——	ARP8
VPS72	——	HDA1
STB5	——	SDS3
VPS71	——	HDA2
RAD6	——	UME1
SLT2	——	DIG1
NUT1	——	UME6
GCN5	——	RTG2
GCR2	——	DOT6
HTZ1	——	PHO23
SNT1	——	SAP30
SWD3	——	VPS71
CLA4	——	AFT1
CCR4	——	SWI4
VPS71	——	PTC1
SET2	——	RSC1
CAC2	——	SSN2
PTP3	——	STE11
SSN2	——	MIG1
STE11	——	RIM11
RCO1	——	UME1
MCK1	——	STB5
SNF12	——	SNF2
RPD3	——	SIN3
SPT2	——	CDC73
RPD3	——	NUT1
SPT8	——	HDA1
SET2	——	BRE1
NRG1	——	CYC8
SPT7	——	NGG1
ADR1	——	SNF1
SIR2	——	HDA1
MGA2	——	RPI1
SSN2	——	CSE2
SWI5	——	RPD3
RPD3	——	VPS72
BAS1	——	RIC1
NPL6	——	SWC3
NUT1	——	AFT1
ARP6	——	UME6
SIN3	——	BRE1
PAF1	——	SET2
ADA2	——	MED1
SIN3	——	VPS71
SIN3	——	SGF29
SWI3	——	SNF5
MED1	——	HDA2
SGF73	——	NHP10
ARP6	——	FUS3
SWC3	——	MED1
CSE2	——	EAF7
PHO2	——	PHO4
TAF14	——	NHP10
ISW2	——	GLN3
PGD1	——	GAL4
SPT4	——	SPT3
GCN5	——	IOC3
NPL6	——	RSC2
EAF7	——	RTG3
ELM1	——	ITC1
RAD6	——	GAL4
CAC2	——	ISW2
LEO1	——	CTR9
HDA2	——	SAP30
GAL4	——	PGD1
SWR1	——	SIN3
SPT3	——	SPT7
SWC5	——	LGE1
SUM1	——	OAF1
SDS3	——	SAS5
YAF9	——	SIN4
BCK1	——	SDS3
SWI3	——	PGD1
HTZ1	——	LEO1
SAP30	——	NHP10
SET2	——	BRE2
CAF40	——	CTK1
HDA3	——	CSE2
PBS2	——	FAB1
EAF1	——	SDC1
ROX1	——	SWR1
PHO85	——	HDA1
SPT3	——	RIM101
HAA1	——	PHD1
SKY1	——	ARP8
SPT2	——	CTR9
MCK1	——	HSL1
SDS3	——	SDC1
NUT1	——	ADA2
CTR9	——	SAS4
PHO85	——	UME6
HDA1	——	HTZ1
SIN3	——	YAF9
EAF5	——	VMS1
HTZ1	——	BRE1
RTT109	——	HSL1
SWI4	——	HSL1
RTF1	——	RXT2
RTF1	——	SWD1
PGD1	——	SDC1
SSN3	——	RIM101
CDC73	——	CTK1
EAF3	——	HTZ1
EAF3	——	ARP6
CAF40	——	RIC1
SWC3	——	RPD3
PTC2	——	CAD1
CAC2	——	MSI1
ARP6	——	SDC1
IES5	——	SOH1
EAF3	——	SWC3
RXT2	——	SDC1
ELM1	——	NUT1
CLA4	——	CTI6
MED1	——	SPT8
SLT2	——	FLO8
TAF14	——	RXT2
GLN3	——	LEO1
MSI1	——	SPT3
SWR1	——	SPT8
HDA1	——	PHO23
YCK3	——	SNF1
SIN4	——	SPT8
ASF1	——	SUS1
SSN3	——	CHA4
HTZ1	——	SOH1
LGE1	——	HOG1
PTC2	——	SAT4
YAF9	——	RCO1
HOG1	——	SIR3
PHO85	——	DIG1
SIT4	——	FAB1
SET1	——	RXT2
RCO1	——	VPS72
RSC1	——	UME6
SPT2	——	HTZ1
SFP1	——	ASF1
HTZ1	——	SSN2
RPD3	——	CTI6
CSE2	——	CTK1
ASF1	——	RTT109
ARP6	——	RSC1
SPT3	——	IXR1
UME1	——	SPT3
GAL11	——	SSN3
HDA2	——	HDA3
ISW1	——	RSC2
SSN3	——	HAP2
SIF2	——	SUM1
LDB7	——	NPL6
PTC2	——	RIC1
RSC30	——	NPL6
OCA1	——	SWI4
LEO1	——	SAP30
SRB2	——	SDC1
DPB4	——	ARP6
RPD3	——	SIR4
PHO4	——	CDC73
SPT20	——	SPT8
ULS1	——	MGA2
RTF1	——	HTZ1
SWI4	——	MCK1
PTK2	——	AFT1
CSE2	——	SNF5
SSN3	——	SAT4
EAF1	——	EAF7
SSN2	——	AFT1
SDS3	——	YAF9
CBF1	——	PTC1
SAP30	——	SNF5
SNF5	——	SLT2
CSE2	——	SWC5
LGE1	——	IES6
SOH1	——	SDS3
PGD1	——	SSN3
LGE1	——	HDA3
SIN4	——	NHP10
RCO1	——	HDA1
MCK1	——	VPS72
YAF9	——	VPS72
SNF6	——	SNF12
RCO1	——	GLN3
UME6	——	SWD1
SUS1	——	EAF7
RAD6	——	DUN1
HAL5	——	SAT4
VPS72	——	SDC1
SIT4	——	SAT4
SIN3	——	SWC5
IES5	——	LEO1
HSL1	——	UME6
SWR1	——	DEP1
MCK1	——	STB2
BUR2	——	CDC73
NRG1	——	MGA2
HFI1	——	ASF1
BRE1	——	VPS15
PHO23	——	SNF5
SWI5	——	SIN4
SNF2	——	ASF1
RIM101	——	RPI1
CTI6	——	VPS72
ASF1	——	RLF2
SWC3	——	RIC1
CSE2	——	VMS1
MCK1	——	SWC3
SAP30	——	CDC73
STB5	——	CHA4
CDC73	——	MED1
ADA2	——	RAD6
RTF1	——	SAP30
ARP8	——	CBF1
SPT3	——	YAF9
SIR2	——	SWR1
ARP6	——	HDA1
TAF14	——	SDS3
KSS1	——	FUS3
DUN1	——	CCR4
STE20	——	CRZ1
SKY1	——	BCK1
STP1	——	STP2
SPT3	——	SNT1
CSE2	——	SNT1
GCR2	——	SNT1
SIN4	——	SRB5
MCK1	——	MIH1
HTZ1	——	PAF1
SAS5	——	SAS2
SOK2	——	PTK2
NPL6	——	VPS71
DPB4	——	RFX1
NUT1	——	MED2
SAS5	——	RLF2
AFT1	——	SNF1
CCR4	——	CAF40
SRB8	——	SSN3
MIG1	——	CTK1
SNT1	——	LEO1
SNF1	——	MSI1
SWI4	——	SNT1
OCA1	——	SIW14
RIC1	——	PTC1
SWR1	——	VPS71
EAF1	——	HFI1
SSN3	——	UME6
RIM15	——	RTG3
SPT3	——	CBF1
VMS1	——	EAF7
STE11	——>	STE7
ARP8	——	SPT2
VPS72	——	SIF2
MED2	——	MED1
FUS3	——	RXT2
EAF3	——	HFI1
SET2	——	GLN3
SUM1	——	HTZ1
CKA2	——	MCK1
SAP30	——	SNF6
SUS1	——	SRB2
ASF1	——	RXT2
PHO23	——	SLT2
CSE2	——	GAL11
SNT1	——	DEP1
EAF5	——	SWC3
SUM1	——	HST1
SSN3	——	RTT109
SIN4	——	HAA1
MOT2	——	NOT3
BRE1	——	CBF1
SIN4	——	PBS2
NRG1	——	SNF1
SIR1	——	SIR2
RTF1	——	NHP10
PHO23	——	SWD3
SWR1	——	FUS3
NPL6	——	ASF1
SOK2	——	YVH1
CCR4	——	DUN1
SUS1	——	SGF29
SAS2	——	ASF1
HSL1	——	FUS3
RTT109	——	SGF29
MED1	——	EAF3
RPD3	——	PPH3
RTT109	——	DUN1
SWC3	——	VPS72
ISW2	——	GCR2
STB5	——	MIG1
ASF1	——	SPT2
RTT106	——	CTR9
ELM1	——	PTC1
EAF1	——	GCN5
SAT4	——	HAL5
SWI4	——	DEP1
DPB4	——	SDS3
HAL5	——	BRE1
SWC5	——	ASF1
CDC73	——	RSC1
GCR2	——	CSE2
DEP1	——	SRB2
BRE1	——	SAS2
IES5	——	STB5
HTZ1	——	SAS2
SAS4	——	SAP30
HFI1	——	SNF5
HTZ1	——	EAF7
RCO1	——	RPD3
DPB4	——	NUT1
LEO1	——	RSC1
SWC5	——	LEO1
RIM101	——	IES3
PTP2	——	PTP3
SIF2	——	SIR3
SDS3	——	VMS1
SIN3	——	MED1
ADA2	——	GCN5
IES5	——	IES3
PPH3	——	SPT4
DOT6	——	IXR1
SPT20	——	SRB2
ARP6	——	SPT8
SIW14	——	OCA1
SPT8	——	VPS71
PHO23	——	CLA4
GCN4	——	SPT20
ACA1	——	BAS1
CYC8	——	NHP10
UME1	——	SWR1
OCA1	——	CBF1
NHP10	——	BRE2
IES2	——	NUT1
SWC3	——	SDC1
HTZ1	——	SAS4
VPS71	——	CCR4
SSN2	——	STP2
HDA1	——	SWC5
GCN5	——	MOT2
ADA2	——	VPS72
RTF1	——	RTT109
SAS5	——	SIR4
RXT2	——	LEO1
IES2	——	CSE2
SOK2	——	SET1
HOG1	——	CDC73
IES3	——	SDC1
CLA4	——	ASF1
CBF1	——	PRK1
GCN5	——	EAF5
SPT8	——	SDC1
EAF5	——	GCR2
ADA2	——	SRB5
CSE2	——	NNF2
CCR4	——	RAD6
ASF1	——	DUN1
NUT1	——	OAF1
ASF1	——	PHO85
GAL11	——	SNF2
IES3	——	ARP8
PHO23	——	NOT3
SNF5	——	SPT3
IXR1	——	KSS1
HSL1	——	IXR1
SKY1	——	SNT1
HSL1	——	SWR1
GCR2	——	MED2
LGE1	——	CKA2
VPS71	——	AFT1
SSN2	——	SOH1
BRE1	——	SSK2
SWI5	——	GAL11
TAF14	——	IES2
SWC3	——	EAF7
SSN2	——	EAF5
CCR4	——	SPT3
ARP6	——	SWC5
IES3	——	SIR1
EAF3	——	EAF1
HDA1	——	BAS1
ADA2	——	IES3
STB5	——	ISW2
UME1	——	SIF2
PHO4	——	DIG1
IES3	——	DPB4
FAB1	——	PBS2
VPS72	——	SPT7
ADA2	——	PAF1
SOH1	——	IES3
MED1	——	BRE1
CLA4	——	CDC73
SSN3	——	SGF73
CLA4	——	NUT1
ADA2	——	SAS3
RTG3	——	PTK2
SNF1	——	GSM1
STP2	——	HAP2
GCN5	——	SIR4
BRE1	——	SWR1
STE7	——>	PBS2
BCK1	——	CKA2
SOH1	——	DEP1
ARP8	——	EAF3
SDC1	——	SWC3
SDS3	——	RPD3
YAF9	——	IES3
SWR1	——	SWC5
ADA2	——	EAF7
SNF2	——	SWI5
RAD6	——	RTT109
ELM1	——	SGF73
EAF1	——	SWD3
UME1	——	RPD3
GCN5	——	SGF73
PHO23	——	SET1
IES3	——	SIW14
RPD3	——	PHD1
SNF6	——	SWI3
YAF9	——	SWD3
HAA1	——	SSN3
PHO23	——	RAD6
TAF14	——	SRB2
BUR2	——	RTF1
EAF1	——	SWD1
RAD6	——	SIN4
RIC1	——	RAD6
CHA4	——	RTG3
ASF1	——	SRB2
SGF29	——	SPT20
SDC1	——	EAF7
SET2	——	LGE1
EAF7	——	GCR2
MAC1	——	RIM101
RSC1	——	IOC3
SRB8	——	GAL11
CTR9	——	CBF1
HOG1	——	FUS3
SNF5	——	GCN5
RXT3	——	CHA4
PHO23	——	GCN5
MIG1	——	SGF73
HST1	——	LDB7
GCN5	——	SRB8
RAD6	——	SPT3
SUM1	——	CSE2
RIM101	——	ACA1
PHO23	——	SWC5
TUP1	——	NRG1
SIR4	——	SIR3
YAF9	——	ADA2
SDS3	——	VPS71
MIH1	——	EAF1
CTI6	——	LGE1
SSN3	——	YAF9
CSE2	——	RAD6
ITC1	——	MSI1
CTI6	——	SET2
SWC3	——	SDS3
RIC1	——	RXT2
MED1	——	STB5
MBF1	——	GLN3
SPT3	——	CDC73
SDC1	——	SWD3
IES2	——	DPB4
HFI1	——	SUS1
YAF9	——	PHO23
EAF7	——	VPS71
SPT2	——	SRB2
SET1	——	SUM1
SIR2	——	SIR1
BAS1	——	IXR1
GCR2	——	RTG2
ADA2	——	SLT2
NUT1	——	SWC5
HTL1	——	SIR3
PBS2	——	HTZ1
ARP6	——	ASF1
EAF5	——	PTC1
SWR1	——	RIC1
NUT1	——	SRB5
RTT109	——	HST1
PTC1	——	MCK1
SAP30	——	HDA3
GCN5	——	SWR1
DEP1	——	SPT8
MIG1	——	FUS3
CRZ1	——	UME6
CRZ1	——	PHO85
SGF73	——	SPT20
CTI6	——	EAF7
RTG3	——	SOH1
VMS1	——	GCR2
HTZ1	——	SWC5
SNF2	——	HTZ1
KIN3	——	IES5
RAD6	——	SOH1
SIR3	——	SUM1
SIR3	——	SIR4
SSN3	——	OCA1
UME1	——	IXR1
SGF73	——	ADA2
PTC1	——	RTG3
AFT1	——	SWR1
BCK1	——	UME6
HFI1	——	MCK1
SPT3	——	SAP30
SNF1	——	PTK2
VPS71	——	EAF7
LGE1	——	SWI3
SUM1	——	RTF1
YAF9	——	CDC73
SWD1	——	SPT4
BCK1	——	PTP2
DEP1	——	SIF2
GCN4	——	IXR1
HOG1	——	FAB1
SDS3	——	ITC1
SWR1	——	SPT4
HTZ1	——	SNT1
SRB5	——	SRB8
YCK3	——	DUN1
ARP6	——	MED1
ISW2	——	NUT1
ASF1	——	CTK1
DEP1	——	SDS3
SWC5	——	EAF5
GCR2	——	CBF1
TAF14	——	SNF5
MED1	——	SOH1
VPS71	——	UME1
RAD6	——	CLA4
ADA2	——	SWR1
FUS3	——	CMK2
SRB5	——	SOH1
DUN1	——	CDC73
TUP1	——	SIN4
BCK1	——	MIG3
HDA1	——	LGE1
VPS72	——	VPS71
CAD1	——	ARP8
VPS72	——	LGE1
SUM1	——	ISW1
SDC1	——	PHO23
PTK2	——	RSC1
SWD3	——	SIN3
SIN4	——	ADR1
CKA2	——	BRE2
PHO23	——	HFI1
DPB4	——	IES5
CKA2	——	LEO1
RTT109	——	RIC1
CTR9	——	PAF1
SIN4	——	ROX1
ASF1	——	CAC2
RIM101	——	VMS1
CLA4	——	SUM1
PGD1	——	SWD3
SSN3	——	PHD1
EAF5	——	LGE1
SPT8	——	SGF29
SWR1	——	IES5
BUR2	——	MOT2
CSE2	——	SUM1
MED2	——	ADR1
SRB2	——	SIN4
CTR9	——	OAF1
VPS71	——	ULS1
IES2	——	SDS3
DPB4	——	ISW2
CDC73	——	SAP30
SDC1	——	RTT109
SPT20	——	HDA2
CSE2	——	PHO23
VPS72	——	DUN1
MOT2	——	CBF1
HDA1	——	BRE1
HDA1	——	IES5
CTK1	——	SWD1
CDC73	——	HOG1
HOG1	——	FLO8
YCK3	——	SUM1
SDC1	——	SPT8
ARP6	——	PAF1
SWC3	——	EAF3
AFT1	——	CSE2
RTT106	——	SPT2
LGE1	——	SOH1
YAF9	——	RXT2
DEP1	——	HTZ1
NPL6	——	SGF73
VPS72	——	MIG1
SNT1	——	UME6
SIR4	——	SIR2
SIN3	——	SPT8
GLN3	——	OTU1
PHO23	——	ARP6
RPD3	——	DUN1
GCN5	——	CSE2
ARP8	——	RXT2
SUM1	——	VPS72
RXT2	——	UME1
RTF1	——	BRE2
SET2	——	RTG3
HDA1	——	HDA3
LGE1	——	SWD3
SIN4	——	UME1
HTZ1	——	SWD1
RIC1	——	CYC8
SSN3	——	SIT4
GCN5	——	ARP6
HOG1	——	PTC1
SUM1	——	SIR4
SWD1	——	SRB2
CTI6	——	NGG1
GCN5	——	ADA2
LEO1	——	RTT106
ROX1	——	RIM101
AFT2	——	SAT4
YAF9	——	SWR1
SPT8	——	SPT20
CTI6	——	SAP30
GLN3	——	PHO2
RIC1	——	SAP30
PIP2	——	MGA2
DIG1	——	BCK1
RLF2	——	STB5
HDA2	——	HDA1
TAF14	——	ARP6
GAL11	——	SIN4
RPD3	——	SAS5
ULS1	——	VPS72
SPT3	——	RXT2
RTT106	——	CTK1
SSN3	——	GAL4
DEP1	——	STP1
IES5	——	YAF9
SWI3	——	SWD3
SOH1	——	SNF6
SPT8	——	PAF1
PTC1	——	HAL5
HTZ1	——	ASF1
CTK1	——	RIM101
CTI6	——	RTG2
SWC3	——	SAP30
GCN5	——	VPS71
EAF3	——	TAF14
SIN3	——	RIC1
CLA4	——	SLT2
SET2	——	SWI4
GCR2	——	MSI1
PAF1	——	SWI4
STE20	——	CLA4
DEP1	——	SET2
RIC1	——	CRZ1
GCR2	——	IES3
SGF73	——	CTK1
RGM1	——	CBF1
CDC73	——	SRB5
ITC1	——	UME1
HDA3	——	SWC3
DEP1	——	RXT3
STE7	——>	FUS3
CKA2	——	RSC2
WTM2	——	GLN3
CBF1	——	SET2
RPD3	——	STE20
PHO85	——	RPD3
SNF1	——	TUP1
SUM1	——	VMS1
HDA1	——	EAF3
CBF1	——	RIM15
HDA3	——	PHO23
SWI5	——	SRB5
GCR2	——	VPS71
GCN4	——	SNF6
PHO85	——	STE20
CSE2	——	UME1
RTG2	——	DEP1
SWR1	——	SNT1
RCO1	——	STB5
ARP8	——	SUM1
NUT1	——	SSN3
RIM11	——	STP2
SWR1	——	RXT2
SKY1	——	LEO1
ITC1	——	GCR2
BRE1	——	SDC1
SET1	——	SIR2
RSC1	——	NPL6
SWD1	——	BRE2
RPD3	——	BRE1
SET1	——	SWD1
VPS71	——	SWC3
ARP6	——	CTI6
CTI6	——	RSC1
ARP8	——	CDC73
HST1	——	SIN3
DEP1	——	SAP30
UME6	——	ELM1
DEP1	——	ITC1
BRE1	——	DEP1
HTZ1	——	ISW1
SWR1	——	HDA2
RTT106	——	RTT109
NPL6	——	VPS72
SWC5	——	SDC1
SNF2	——	TUP1
DAL81	——	NRG1
SSN3	——	GCN4
ITC1	——	SNF1
YAP3	——	ADA2
SOH1	——	SSN3
CTK1	——	YAP3
HTZ1	——	SNF1
CSE2	——	SSN3
SGF73	——	GLN3
CCR4	——	STB5
HDA1	——	SAP30
SAP30	——	HTZ1
ISW1	——	SIN3
PHO85	——	SRB5
UME6	——	SET2
RPD3	——	FAB1
RPD3	——	UME1
CHA4	——	SNT1
YCK3	——	GLN3
BRE2	——	ASF1
BRE1	——	RCO1
CDC73	——	SOH1
GAL4	——	SNF12
RCO1	——	HDA2
CCR4	——	CTK1
EAF3	——	SOH1
PTP2	——	PBS2
YAF9	——	RPI1
CTR9	——	RTG3
SWI4	——	FAB1
UME1	——	RXT2
SOH1	——	SUS1
GCR2	——	NHP10
SWC3	——	SWC5
MED1	——	ASF1
SPT8	——	ADA2
VPS72	——	CTK1
SPT2	——	LEO1
OCA1	——	IXR1
DAL81	——	UME6
RFX1	——	SDC1
SNF2	——	MIG1
CSE2	——	DPB4
SAP30	——	SRB2
GAL11	——	CDC73
SSN2	——	SSN3
SRB2	——	SPT3
RTT106	——	PAF1
SIN3	——	EAF7
UME6	——	VPS71
SWC3	——	RCO1
VPS71	——	LEO1
SET1	——	SIR3
YAF9	——	EAF5
SWI3	——	IXR1
SWI3	——	RSC1
ARP8	——	RIM101
RIC1	——	RTF1
SET2	——	SRB8
YAF9	——	SDC1
MED2	——	GAL11
LGE1	——	RTF1
ASF1	——	RTT107
CTK1	——	PHO4
RTT106	——	PGD1
HDA1	——	RTG3
VPS72	——	RTF1
ISW2	——	PPH3
ADA2	——	SNT1
BRE1	——	IXR1
GCR2	——	SOH1
CCR4	——	SAP30
SRB2	——	EAF1
SAS5	——	PHO23
RCO1	——	VPS71
EAF7	——	SPT3
RTT106	——	SIR4
UME6	——	SWC5
UME6	——	CTI6
NUT1	——	DOT6
RSC1	——	SWR1
NGG1	——	SRB2
DPB4	——	CSE2
EAF1	——	LGE1
SNF5	——	SPT2
RTF1	——	PHO23
YOX1	——	IES3
HAP2	——	HAP4
EAF7	——	SWC5
EAF1	——	RTT109
EAF5	——	STB5
RTF1	——	EAF5
SPT3	——	UME1
ARP8	——	CTK1
EAF5	——	MGA2
SSN2	——	SGF29
SPT8	——	SGF73
VPS71	——	NUT1
SAT4	——	PHO85
DUN1	——	PGD1
ITC1	——	EAF7
PAF1	——	CTK1
CTK1	——	VPS72
GSM1	——	MGA2
DUN1	——	SIF2
SPT3	——	BRE2
VMS1	——	FUS3
VPS72	——	SAS3
SAP30	——	SNT1
MSI1	——	FUS3
CSE2	——	SWC3
RSC1	——	MCK1
LEO1	——	SWR1
PHO85	——	ELM1
RIM101	——	MOT2
SIN4	——	CTI6
VPS71	——	ARP6
RTG3	——	RIC1
SWR1	——	SPT3
SSN2	——	SRB2
MIG3	——	SGF73
YAF9	——	SWC3
VPS72	——	SSN3
CAC2	——	RTT106
EAF3	——	RSC1
SDS3	——	SNF6
RPD3	——	CLA4
SGF73	——	SWD3
EAF3	——	VPS71
SAP30	——	SAS4
ADA2	——	RIC1
SIN3	——	BRE2
HSL1	——	YVH1
RIM15	——	RXT2
ISW1	——	SUM1
UME6	——	STP2
PHO23	——	SRB2
GAL11	——	BRE1
SIR1	——	RLF2
ITC1	——	SGF73
PHO23	——	SUM1
ARP8	——	PGD1
SUM1	——	GLN3
HFI1	——	SSN2
GCN5	——	RLF2
EAF7	——	RSC1
SIN3	——	SWD3
GCN5	——	IXR1
SWI3	——	MED2
RCO1	——	RSC2
PTK2	——	SKY1
NPL6	——	RTF1
SGF29	——	HFI1
HDA1	——	ARK1
SRB8	——	PGD1
SWC5	——	VPS71
SWR1	——	SRB2
SWR1	——	EAF3
CTR9	——	SET2
SET2	——	VPS72
SAP30	——	SSN2
RIC1	——	STE20
SSN3	——	RCO1
CCR4	——	ASF1
SAP30	——	ARP6
VPS72	——	SIN3
SKY1	——	PTK2
RXT2	——	CTK1
ASF1	——	SET2
GCR2	——	SGF73
SET2	——	EAF1
PHO85	——	BRE1
SNF5	——	RTG3
NPL6	——	CBF1
CSE2	——	MIG1
YAF9	——	BRE2
SIF2	——	SNT1
NUT1	——	EAF5
ELM1	——	SWC5
AFT1	——	RIM101
RIM101	——	SWR1
BRE2	——	LGE1
MCK1	——	SDC1
DLS1	——	ITC1
GCR2	——	IXR1
HSL1	——	NHP10
UME1	——	SAP30
ARP8	——	PHO23
RIM11	——	FUS3
SGF73	——	PIP2
SRB5	——	CSE2
SPT3	——	PHO23
CBF1	——	SLT2
SLT2	——	PTC1
GCN5	——	AFT1
RPD3	——	SNT1
SAS2	——	RPD3
RXT2	——	YAF9
LGE1	——	DEP1
LGE1	——	HTZ1
KIN3	——	PTC1
SMK1	——	SLT2
TAF14	——	ISW1
CDC73	——	RXT2
STP2	——	RIM11
SWD1	——	URC2
VPS71	——	EAF5
HFI1	——	SWD3
SUS1	——	NGG1
RCO1	——	CBF1
SPT8	——	RTF1
BCK1	——	SIN3
GAT3	——	SIN3
SSN2	——	VPS71
MCK1	——	PTC1
CDC73	——	PBS2
VPS72	——	ARP6
EAF5	——	MED1
HTZ1	——	RXT2
SWI4	——	SNF5
SSN3	——	SWI3
MCK1	——	CRZ1
SWI3	——	SWD1
SPT8	——	LGE1
SDS3	——	BRE1
CTK1	——	LEO1
IES5	——	SWD3
SGF29	——	SPT7
CTI6	——	CBF1
RXT2	——	SAP30
SPT3	——	SWC5
CDC73	——	ASF1
TDA9	——	RIM101
RXT2	——	HDA2
MED1	——	CSE2
SIR1	——	SWI4
RTF1	——	SDS3
FUS3	——	MCK1
SNF1	——	ELM1
RIM101	——	NNF2
VPS71	——	ISW1
IES3	——	SPT3
SAS2	——	SPT7
SUS1	——	SFP1
MAC1	——	PTK2
YAF9	——	HDA3
NPL6	——	SDS3
RXT2	——	SDS3
MSI1	——	ASF1
SPT10	——	CCR4
SWC3	——	RAD6
GAL4	——	EAF5
SUS1	——	SPT3
SPT3	——	ADA2
GCN5	——	EAF1
CDC73	——	SWD3
IXR1	——	SPT8
SSK2	——	SGF29
HDA3	——	SAP30
BRE1	——	STB5
SSK2	——	STE11
BRE1	——	ARP6
RPD3	——	DEP1
SOH1	——	GCR2
SAS2	——	SDS3
IES3	——	DEP1
CKA2	——	RTT109
ARP6	——	SWR1
SNT1	——	SPT4
KSS1	——	FLO8
DEP1	——	STB5
IES5	——	GLN3
RTF1	——	SAS4
NHP10	——	ISW2
SIR2	——	YAF9
SPT3	——	SIF2
LGE1	——	SWR1
SWC3	——	HDA3
GCN5	——	DIG1
SPT7	——	CKA2
SPT4	——	IES5
PAF1	——	VPS72
STB5	——	AFT1
CDC73	——	GCR2
UME1	——	SWC5
SPT7	——	SIN4
BCK1	——	SWI5
DEP1	——	DPB4
SAP30	——	SGF29
EAF1	——	VPS72
TAF14	——	IES3
LEO1	——	RTF1
CTI6	——	VPS71
ARP8	——	IES5
RIM11	——	MCK1
SWI4	——	UME6
ARP6	——	SIF2
SPT4	——	GCR2
VPS72	——	GCR2
LEO1	——	ARP6
CLA4	——	DEP1
CRZ1	——	SNT1
SAS3	——	NGG1
CTI6	——	RIM101
CDC73	——	CTI6
CKA2	——	NRG1
PBS2	——	UME6
NHP10	——	ARP6
SIN3	——	RAD6
CDC73	——	HTZ1
CYC8	——	MIG1
PTP2	——	ADR1
RFX1	——	ARP8
HDA1	——	SUM1
CYC8	——	SET2
RPD3	——	NGG1
SNF1	——	SIF2
LEO1	——	YAF9
LEO1	——	SPT8
HDA1	——	PGD1
TAF14	——	IES5
BAS1	——	SWI4
ADA2	——	SUS1
IES3	——	IXR1
ADA2	——	SNF2
RIC1	——	SWI4
WTM2	——	ISW2
SIN4	——	SOK2
SWC5	——	RTG3
RXT2	——	SWI4
PHO23	——	DEP1
RIM11	——	GLN3
HDA2	——	RSC1
CLA4	——	SPT3
ARP6	——	MGA2
SAT4	——	RTG3
SAS4	——	SAS5
HTZ1	——	SPT4
HTZ1	——	VPS71
PGD1	——	NUT1
SAP30	——	SOH1
LEO1	——	SLT2
SRB2	——	HOG1
SIN4	——	HOG1
EAF5	——	EAF3
ELM1	——	SET1
SPT4	——	SNT1
NRG1	——	ASF1
CAC2	——	SET2
MED1	——	SPT3
SPT20	——	SSN2
HTZ1	——	ARP8
RIM101	——	MED1
NPL6	——	SSN2
GCR2	——	SWC3
SUS1	——	PHO2
RTT109	——	RXT2
RPD3	——	SWC5
RAD6	——	HFI1
RGM1	——	PTC1
CTI6	——	SNT1
SUM1	——	LEO1
SWC3	——	SOH1
SAP30	——	SUM1
DPB4	——	ITC1
SGF73	——	SWI4
VPS71	——	YHP1
SIN3	——	NHP10
SIR4	——	RTT106
RTT109	——	DEP1
SPT7	——	SGF73
SPT7	——	RTG2
SWD3	——	RTT109
SPT3	——	SPT2
SSN2	——	SNT1
NHP10	——	HDA1
SPT3	——	EAF7
MCK1	——	YHP1
ARP8	——	DUN1
YAF9	——	SNF5
SIF2	——	SWC3
RFX1	——	ITC1
LGE1	——	SRB5
YAF9	——	SPT3
GCR2	——	SWC5
VPS72	——	EAF1
CDC73	——	SPT8
IES2	——	STB5
ASF1	——	DAL81
DAL81	——	SNF5
MED2	——	SRB2
SOK2	——	VPS71
GCN4	——	BAS1
RLF2	——	SIR1
ARP8	——	SGF73
SRB2	——	BRE2
CBF1	——	RTG3
IES3	——	ITC1
PHO85	——	PHO4
CDC73	——	RCO1
PGD1	——	SIN4
SPT4	——	SOH1
HDA1	——	VPS71
MED1	——	ARP6
HFI1	——	NGG1
RTG3	——	FUS3
SPT4	——	NHP10
RIC1	——	SRB2
SWR1	——	SOH1
EAF1	——	SAP30
SAS3	——	EAF1
ARP8	——	HSL1
STP2	——	SPT8
SAP30	——	SWI5
RXT2	——	DEP1
RIM101	——	DUN1
SPT3	——	SNF5
SWI5	——	EAF7
PPH3	——	SUS1
IES3	——	NHP10
AFT1	——	SNF5
SWD3	——	LGE1
SWD1	——	RTF1
RTT109	——	MCK1
BAS1	——	RIM101
BRE2	——	SWD3
SSN3	——	CDC73
SAP30	——	RTF1
BRE1	——	SPT3
SRB2	——	SWC5
SET2	——	IES3
RTF1	——	VPS71
SSK2	——	YAP3
HTZ1	——	SWI4
SAS3	——	TAF14
SRB5	——	ARP8
RPD3	——	EAF3
GCN5	——	HDA3
SLT2	——	UME6
MGA2	——	SWI5
CTI6	——	IXR1
SNF5	——	SWI3
HAL5	——	SGF29
SEF1	——	SNT1
BRE1	——	PHO23
SET1	——	PTC1
ADR1	——	PTC1
NGG1	——	SPT7
MED1	——	SDC1
UME6	——	SNT1
HTZ1	——	CBF1
CDC73	——	PHO23
SDS3	——	SIF2
SAP30	——	CTI6
RIM15	——	SNF6
ADA2	——	SPT7
MIH1	——	CHA4
HFI1	——	SGF73
GAL4	——	ADA2
STB5	——	GLN3
ELM1	——	HSL1
HOG1	——	PBS2
CLA4	——	SWI4
ISW2	——	NRG1
RIC1	——	RTT106
SUM1	——	SPT3
SIR2	——	SIR3
CTK1	——	CSE2
CBF1	——	CTK1
RLF2	——	RPD3
CTI6	——	HDA2
BRE2	——	ISW2
NHP10	——	TAF14
SAP30	——	SPT20
RGT1	——	SSN2
SNF6	——	SNF2
NPL6	——	BRE2
GCN4	——	PGD1
VPS71	——	SWD3
ARP6	——	SRB2
SRB2	——	RTG3
ADR1	——	RPD3
RTF1	——	VMS1
SUS1	——	GCN5
SPT8	——	SWI4
RIM15	——	RDR1
HTZ1	——	HDA2
SNT1	——	CTK1
PHO85	——	YAP3
STB5	——	VMS1
SUS1	——	ADA2
GCN4	——	SRB2
TAF14	——	MED2
SKY1	——	PBS2
FAB1	——	SOH1
RAD6	——	PAF1
SAP30	——	BRE2
CSE2	——	IXR1
SAS5	——	DEP1
EAF5	——	CKA2
SWC3	——	SWR1
SPT3	——	GLN3
SRB8	——	SRB2
SAS3	——	SWR1
BAS1	——	PHO2
CDC73	——	VPS71
BCK1	——	PTC1
HTZ1	——	CDC73
SPT3	——	SPT8
RLF2	——	FUS3
CCR4	——	NUT1
SWI4	——	FUS3
PHO23	——	NHP10
RPD3	——	HDA3
EAF5	——	CTK1
SIR2	——	DEP1
ADR1	——	PIP2
ULS1	——	SRB8
DEP1	——	SAS4
HSL1	——	MIH1
SGF73	——	HFI1
SNT1	——	HST1
ADR1	——	HDA1
SPT2	——	SNF6
IES5	——	UME6
CTR9	——	HTL1
YAF9	——	ARK1
SLT2	——	PTC2
NGG1	——	SNF2
VPS72	——	DEP1
LEO1	——	PAF1
RSC2	——	GCN5
SPT8	——	IES5
NNF2	——	RIC1
VPS71	——	RSC1
STE20	——>	STE11
SIN3	——	CKA2
ARP8	——	SIR1
RDS1	——	SNF6
LEO1	——	SPT4
CAC2	——	RAD6
SAP30	——	HDA1
SDS3	——	SUS1
RPD3	——	PHO4
GCN5	——	RSC30
HFI1	——	HDA2
GAL4	——	SPT3
SPT20	——	SUS1
ARP6	——	DPB4
PHO23	——	BRE2
SUM1	——	SIR2
SPT10	——	SWR1
LGE1	——	CDC73
CLA4	——	STE20
RTT109	——	CBF1
SPT3	——	RAD6
ARP6	——	SWD1
SSN3	——	MCK1
GCR2	——	RTG3
SLT2	——	RPI1
SIN3	——	SDS3
STP2	——	SGF73
HDA1	——	SNT1
SSN3	——	VPS72
PHO23	——	HDA1
PAF1	——	RTF1
BRE1	——	RIC1
SPT3	——	SRB8
SIN3	——	SWR1
SIR2	——	CAC2
CCR4	——	SRB5
LDB7	——	HTL1
SET2	——	SOH1
ADR1	——	FUS3
ARP8	——	SAS4
SNF2	——	ADR1
ITC1	——	CSE2
UME1	——	CLA4
EAF1	——	AFT1
SET1	——	UME6
IES3	——	IES5
CTI6	——	LEO1
ASF1	——	PHO23
PTC1	——	SWI4
SWC5	——	SNT1
SGF29	——	SPT3
HFI1	——	GCN5
IES5	——	UME1
SRB2	——	ARP6
KSS1	——	PTC1
EAF7	——	ARP8
MOT2	——	PGD1
LEO1	——	CUP2
SLT2	——	PAF1
SWC3	——	IES3
SRB8	——	SWC3
ROX1	——	CLA4
HAP2	——	BRE2
PAF1	——	CCR4
ARP6	——	SUM1
HAL5	——	NHP10
HDA1	——	SWR1
KIN3	——	SNF1
GCN5	——	RXT3
SNT1	——	SUM1
SIN3	——	RSC1
SWD1	——	SOH1
RXT2	——	EAF3
SET1	——	HST1
SAS5	——	ASF1
SOH1	——	SSN2
RTF1	——	SPT3
CYC8	——	SIN3
VPS71	——	NHP10
VPS71	——	RXT2
GAL4	——	SIR4
ADA2	——	HFI1
TAF14	——	RCO1
GSM1	——	RXT2
BRE2	——	EAF3
EAF5	——	SNT1
ASF1	——	SOH1
SOH1	——	MED2
BRE2	——	SWD1
RIM101	——	PHO23
LGE1	——	SNT1
VPS72	——	SUS1
STE11	——	FUS3
SSK2	——	RIM15
RTT109	——	SWI4
YAF9	——	DEP1
SSN3	——	MED1
GAL4	——	SPT20
EAF1	——	HDA1
TAF14	——	NUT1
SDC1	——	SGF73
SKY1	——	SPT4
RPD3	——	SIR3
ADR1	——	SDS3
BRE2	——	SRB2
SWI5	——	PHO2
RTT107	——	CLA4
RGT1	——	CUP2
BRE2	——	SWC3
ISW2	——	CTR9
CAC2	——	SWI5
LEO1	——	GCR2
NPL6	——	SWC5
TAF14	——	RTT107
PTC1	——	SSK2
EAF7	——	NGG1
IES2	——	SNF5
ADA2	——	MOT2
EAF1	——	HDA3
SPT4	——	SKY1
LGE1	——	VPS71
SAP30	——	SWD1
CBF1	——	UME6
CTK1	——	EAF7
DUN1	——	RAD6
VPS71	——	DUN1
SAP30	——	UME6
GCN5	——	SNF2
HTZ1	——	NGG1
SIR2	——	SIR4
HTZ1	——	SRB8
SAS3	——	MIG1
CLA4	——	FAB1
SPT7	——	HDA2
SIN4	——	SKY1
RPD3	——	CTK1
JHD1	——	LEO1
DPB4	——	DLS1
PAF1	——	CKA2
MED1	——	PGD1
SPT8	——	RTG2
CLA4	——	SGF73
RGM1	——	CTK1
SRB5	——	PGD1
EAF1	——	SWC5
RTT109	——	SOK2
SOH1	——	NUT1
CTK1	——	SFP1
SWI4	——	PAF1
RXT2	——	RPD3
SPT2	——	CTK1
SNF2	——	ISW1
VPS72	——	YAF9
ULS1	——	RTF1
YAP3	——	NUT1
SWI3	——	RTF1
ARP8	——	MIG1
NUT1	——	VPS72
STB5	——	BAS1
RTG3	——	SNF12
RPD3	——	SAS2
HTL1	——	NPL6
PHO23	——	PGD1
SWD3	——	HTZ1
DEP1	——	CTI6
MED2	——	SRB5
LGE1	——	SWI4
ARP6	——	NHP10
SNF1	——	SIT4
SET2	——	MED1
CYC8	——	NRG1
EAF5	——	SGF73
VPS72	——	RAD6
SNF1	——	SRB8
HAL5	——	ACA1
CTR9	——	CDC73
NPL6	——	RSC30
RXT3	——	CTI6
EAF7	——	CTK1
ARP8	——	FAB1
ADA2	——	SWI4
SET1	——	RCO1
BRE2	——	SWI4
SDC1	——	CSE2
GLN3	——	RFX1
LEO1	——	SWC5
SWI4	——	NHP10
SPT3	——	LEO1
VPS72	——	MGA2
PTP2	——	PTC1
VPS72	——	ISW1
GCN5	——	BRE2
GAL11	——	PGD1
SWC5	——	ISW1
DEP1	——	RPD3
SET2	——	HTZ1
VPS71	——	HDA1
MED1	——	IXR1
SWI4	——	SSN2
VPS72	——	SWD1
ACA1	——	EAF5
RTG2	——	PHO23
PTK2	——	MCK1
HOG1	——	VMS1
RTF1	——	RXT3
RPD3	——	ARP6
IES3	——	BRE2
SWI4	——	SIN4
SPT3	——	ISW2
DEP1	——	LEO1
VPS71	——	FUS3
HAP2	——	LEO1
RIC1	——	RTG3
RXT3	——	DOT6
PBS2	——	SRB2
SRB5	——	MED2
MGA2	——	ARP6
SNF2	——	GCN5
YOX1	——	AFT1
RPD3	——	SWI4
CTI6	——	PHO23
PBS2	——	ELM1
LGE1	——	GCR2
SPT10	——	MOT2
EAF1	——	GCR2
RPD3	——	SWR1
SAS5	——	SAS4
SUS1	——	ADR1
CTI6	——	SOK2
SAP30	——	DEP1
MBF1	——	VMS1
SWC5	——	EAF7
ARP6	——	CCR4
IES5	——	SDS3
DEP1	——	SEF1
PBS2	——	SSK2
SIN3	——	SWI5
SNF2	——	GAL4
SPT8	——	CLA4
SIN3	——	UME6
MCK1	——	IXR1
DIG1	——	SIT4
TAF14	——	RTF1
MOT2	——	BUR2
CLA4	——	PTC1
UME1	——	RXT3
SUM1	——	UME6
PPR1	——	RIM101
RCO1	——	RLF2
MBF1	——	IES3
EAF1	——	HTZ1
SWC5	——	RPD3
LEO1	——	RIC1
LGE1	——	CTK1
SPT7	——	HFI1
CSE2	——	RIM101
IES2	——	SOH1
PHO85	——	CSE2
SWI4	——	HTZ1
NRG1	——	CBF1
ASF1	——	ARP6
NUT1	——	PGD1
SDS3	——	SIN3
UME1	——	EAF3
MCK1	——	ASF1
CYC8	——	GCN5
SSN2	——	SIN4
SUM1	——	ARP8
STB5	——	SIF2
SPT3	——	HTZ1
CUP2	——	AFT1
STB5	——	STP4
ARP8	——	TAF14
HTZ1	——	SAS3
ARP8	——	RPD3
LGE1	——	RTG2
SOK2	——	ELM1
HFI1	——	RTF1
SPT4	——	SWC3
MED1	——	RCO1
ARP8	——	STB5
CTI6	——	CYC8
SIN3	——	HTZ1
RAD6	——	SAS2
IES3	——	RIM101
SRB8	——	SOH1
RPD3	——	RAD6
GCR2	——	SWD1
SSN3	——	HDA1
CLA4	——	EAF1
ADA2	——	BUR2
SAP30	——	RXT2
CSE2	——	SET2
EAF7	——	STB5
SGF73	——	SDC1
SSK2	——	SWR1
BCK1	——	SWI4
ULS1	——	SUS1
SSN3	——	MED2
ITC1	——	SSN2
EAF1	——	LEO1
SAP30	——	MED2
SSN3	——	EAF7
ARP8	——	NUT1
SSN3	——	MOT2
RTF1	——	SKY1
SSN2	——	EAF1
SWI4	——	SFP1
HFI1	——	ADR1
FUS3	——	SNF1
CAC2	——	YAP3
HAL5	——	FUS3
ARP8	——	GLN3
CDC73	——	GAL11
SAS4	——	RPD3
ARP8	——	SNF1
YAF9	——	HOG1
CTI6	——	UME6
YAF9	——	DPB4
CLA4	——	RSC30
SWC3	——	NUT1
IES3	——	SUS1
SPT3	——	HOG1
EAF3	——	SWC5
PRK1	——	SIW14
SGF29	——	GLN3
SGF73	——	TAF14
NUT1	——	GAL11
DUN1	——	ASF1
VPS71	——	SUM1
HDA2	——	SIN3
SUS1	——	HFI1
CSE2	——	SSN2
MED2	——	NUT1
CCR4	——	GAL11
ARP8	——	BRE1
BRE1	——	SRB2
WTM2	——	ADR1
SPT8	——	SIN3
SPT4	——	SIF2
OAF1	——	PIP2
SIP3	——	RTG3
ARP8	——	SNT1
SIN3	——	LGE1
VPS72	——	RSC1
RIM101	——	RXT2
SSK2	——	CKA2
VPS71	——	LGE1
IES2	——	ASF1
ARP6	——	SOH1
SIN4	——	ELM1
ITC1	——	STB5
UME6	——	HDA3
PHO23	——	IXR1
HDA3	——	LGE1
ARP8	——	HDA1
PHO23	——	RIC1
ASF1	——	PPH3
CKA2	——	PTC1
ELM1	——	KIN3
VPS72	——	ASF1
BRE2	——	SDC1
GCN5	——	RTT106
CYC8	——	RGT1
SWR1	——	LGE1
CTR9	——	RCO1
HTZ1	——	SPT8
NHP10	——	PPH3
SAP30	——	SET2
RXT2	——	HTZ1
SAP30	——	SIN3
EAF7	——	SPT2
YAF9	——	SNT1
CTI6	——	BRE1
RTF1	——	STB5
EAF5	——	GCN5
RCO1	——	SSN2
SOK2	——	SET2
SWI3	——	SNF12
GCN5	——	SPT8
RTT109	——	ARP8
RTT106	——	LEO1
RIM15	——	SAT4
GCR2	——	DAL81
SOK2	——	STB5
HTZ1	——	RPD3
HSL1	——	RIM15
RCO1	——	SET2
SRB2	——	SNF2
NOT3	——	MOT2
TUP1	——	MIG1
DEP1	——	PHO23
ARP8	——	UME1
PTC1	——	OCA1
UME1	——	DEP1
VPS72	——	SWC3
RIM101	——	RSC1
SDC1	——	SOH1
SET2	——	SPT8
RFX1	——	ISW2
ASF1	——	SNF2
CSE2	——	RCO1
SWR1	——	IES3
PGD1	——	SWI4
SPT10	——	SIR3
PHO23	——	RTG3
BCK1	——	PHO4
CAF40	——	HTL1
PTP3	——	PTP2
RAD6	——	CSE2
KSS1	——	CST6
ELM1	——	SNF1
SPT3	——	SPT20
HFI1	——	SPT3
STB5	——	RSC1
PTC2	——	PTC1
EAF1	——	SAS4
MOT2	——	SPT20
IES3	——	VPS71
CTK1	——	RTG3
CLA4	——	BRE1
LGE1	——	SDS3
ADR1	——	VMS1
LGE1	——	RIM101
CSE2	——	RSC2
MIG1	——	SIN3
ADA2	——	MED2
IXR1	——	SET2
HDA2	——	RIM101
SIN3	——	DEP1
RIM15	——	SSK2
ASF1	——	CLA4
VPS71	——	HTZ1
SRB8	——	SIN4
SSK2	——	PBS2
SWC5	——	IES3
LGE1	——	CCR4
RTF1	——	SDC1
SAS2	——	SAP30
ULS1	——	VPS71
RXT2	——	RTG3
ASF1	——	SPT4
ITC1	——	ISW1
SIR1	——	SAS4
SPT3	——	SWC3
RTF1	——	CTK1
CCR4	——	ARP6
SET2	——	VMS1
CDC73	——	SKY1
SSN3	——	MIG1
TAF14	——	SSN2
LEO1	——	MED1
IES3	——	CKA2
SIN3	——	ISW1
RCO1	——	CSE2
PTC1	——	HSL1
VPS72	——	HDA3
CDC73	——	SWI3
YAF9	——	EAF1
PHO85	——	ARP8
IOC3	——	UME6
NUT1	——	SWR1
RPD3	——	VPS71
PTP3	——	HOG1
GCN4	——	HAP4
HAL5	——	PBS2
PHD1	——	SAT4
SPT3	——	SRB2
SAS2	——	RTF1
SWR1	——	HTZ1
EAF3	——	HDA2
UME6	——	DEP1
CDC73	——	SNF5
UME1	——	PHO23
EAF3	——	SSN2
PHO23	——	SIN3
SPT3	——	STP2
ARK1	——	SIW14
SET2	——	BAS1
KIN3	——	ADR1
RTF1	——	CKA2
SWR1	——	CTK1
DEP1	——	HSL1
ARP6	——	NUT1
SUM1	——	AFT1
NHP10	——	RXT2
HDA1	——	SKY1
MBF1	——	SIF2
SWI4	——	DUN1
RSC1	——	PTC1
PHO4	——	STE11
CMK2	——	OCA1
SPT20	——	HDA1
SWI5	——	RXT2
CKA2	——	MIH1
HAL5	——	RGT1
SAS2	——	SPT20
SOH1	——	SIN4
CDC73	——	MSI1
NRG1	——	SSN3
SET2	——	CTI6
STE11	——>	CMK2
ARP8	——	SGF29
RIC1	——	NUT1
SIR1	——	HTZ1
FLO8	——	FUS3
CDC73	——	CSE2
FAB1	——	SLT2
EAF7	——	EAF3
UME1	——	RIC1
PHO23	——	SIF2
RTT109	——	ELM1
NOT3	——	CCR4
ARP6	——	YAF9
SWI4	——	YAF9
ARP8	——	SDC1
CCR4	——	NOT3
GLN3	——	VPS72
GLN3	——	IES3
RTT109	——	STB5
HTZ1	——	IES5
HOG1	——	ELM1
SPT8	——	BRE1
CTI6	——	STB5
HOG1	——	KSS1
SSN3	——	VMS1
KSS1	——	CAF40
SNF1	——	MIG1
CSE2	——	SDS3
CTI6	——	PBS2
RSC1	——	SAT4
DPB4	——	EAF1
GAL4	——	SNF2
LEO1	——	HTZ1
GCR2	——	PGD1
SGF73	——	SNF1
SSN2	——	SRB8
CDC73	——	SPT4
SET1	——	SWR1
PTP2	——	HOG1
SIN4	——	GCR2
SAT4	——	RSC30
HDA1	——	SIN3
SNF1	——	MED2
TDA9	——	SGF73
RTF1	——	SLT2
BRE1	——	DUN1
SNF5	——	SNF6
SIN3	——	FUS3
SPT20	——	HOG1
SSN2	——	LEO1
ISW2	——	CAC2
CLA4	——	YVH1
MED1	——	MED2
SDC1	——	SWC5
DOT6	——	RPD3
RPD3	——	STB5
SIN3	——	VPS72
SPT2	——	ARP8
VPS71	——	SWI4
AFT1	——	PTC1
RPD3	——	FUS3
IES2	——	NHP10
ISW1	——	HTZ1
EAF3	——	RCO1
VPS72	——	RXT2
SNT1	——	HDA2
SSN3	——	STB5
HSL1	——	EAF7
SWI4	——	LGE1
ADA2	——	ISW2
SUS1	——	FUS3
RAD6	——	UME6
SPT20	——	SPT7
GAL11	——	SSN2
BRE1	——	SAP30
CDC73	——	SAS4
BAS1	——	RIM15
SGF29	——	SGF73
CSE2	——	EAF3
SPT10	——	HDA1
RPD3	——	IOC3
ISW2	——	ISW1
MED2	——	SSN3
SWC3	——	HDA1
SWI4	——	SLT2
MIG1	——	EAF5
VPS71	——	SOH1
SIN3	——	UME1
YAF9	——	CTK1
YCK3	——	MIH1
CAC2	——	FUS3
HOG1	——	SPT2
SWD3	——	SUS1
CDC73	——	HDA1
SSK2	——	BCK1
IES2	——	VMS1
SSN2	——	CTK1
SDS3	——	SWI5
MGA2	——	BAS1
SUM1	——	MGA2
NUT1	——	YHP1
HDA1	——	CTK1
NHP10	——	SET2
SWI4	——	SWD3
SET2	——	AFT1
SIT4	——	PPH3
ULS1	——	SET2
GCN5	——	CST6
YVH1	——	SWI4
SNF5	——	RTF1
SDS3	——	HDA2
RPD3	——	CAF40
HST1	——	RFM1
SAP30	——	VPS71
HSL1	——	DEP1
SIR1	——	GAL11
PRK1	——	RSC30
HDA3	——	ARP8
HAP2	——	AFT1
GAL4	——	SGF29
GCN5	——	YAF9
BCK1	——	NRG1
SAP30	——	HDA2
NPL6	——	LDB7
BRE2	——	SIN3
[truncated: 3,659 more rows]
