# Supplementary material
Source: publisher figshare collection journal article supplement (https://plos.figshare.com/articles/dataset/_/790268)
Supplement: Supplementary file 1 [file 1 › Table_S4.docx]

**Table S4** **Evaluation of the WinMine and DM_BN algorithm based on known knowledge of chromatin modification complex.**

| ***Method*** | ***No. of edges**** | ***Recall*** | ***Precision*** | ***Fisher test*** |
| --- | --- | --- | --- | --- |
| ***P-value*** |
| WinMine | 119 | 0.04639 | 0.7731 | <2.2e-16 |
| DM_BN | 115 | 0.04942 | 0.85217 | <2.2e-16 |

*: the number of edges in chromatin modification complex predicted by WinMine and DM_BN
