# Supplementary material
Source: publisher figshare collection journal article supplement (https://plos.figshare.com/articles/dataset/_/790268)
Supplement: Supplementary file 1 [file 1 › Table_S5.docx]

**Table S5.** **The similarity between the target gene sets of subunits of the SWR1 complex and Htz1.**

| **Reg1** | **Reg2** | **#Common targets of**  **Reg1, Reg2** | | **#Targets of Reg1** | **#Targets of Reg2** | **JI(Reg1,Reg2)** |
| --- | --- | --- | --- | --- | --- | --- |
| yaf9 | htz1 | | 24 | 42 | 68 | 0.27906 |
| arp6 | htz1 | | 18 | 24 | 68 | 0.24324 |
| swc5 | htz1 | | 24 | 26 | 68 | 0.34285 |
| vps72 | htz1 | | 17 | 21 | 68 | 0.23611 |
| swr1 | htz1 | | 21 | 33 | 68 | 0.2625 |

Reg1: regulator1.

Reg2: regulator2.

*#*: number of the targets genes in deletion mutant of regulator 1, regulator 2 and in both of them

*JI*: Jaccard similarity index between the target gene sets of the two regulators.
