# Supplementary material
Source: publisher figshare collection journal article supplement (https://plos.figshare.com/articles/dataset/_/790268)
Supplement: Supplementary file 1 [file 1 › Table_S6.xlsx]

## Sheet: Table S6
Table S6 Edges inferred by WinMine (kappa=0.001)
CHA4	——	GAT3
CHA4	——	MIH1DELELM1
IXR1	——	GCR2
IXR1	——	YFL052W
IXR1	——	MIG3
CAC2	——	RGM1
CAC2	——	MBF1
RGM1	——	GAT3
RGM1	——	SDS3
YDR049W	——	SNF6
YDR049W	——	HTL1
RDR1	——	MIG3
RDR1	——	HTL1
GCN4	——	SMK1
GCN4	——	GCR2
SMK1	——	SPT10
MBF1	——	GCR2
YFL052W	——	HTL1
SPT10	——	NUT1
SPT10	——	SWD3
NUT1	——	SWI3
GAT3	——	IOC3
SIF2	——	SNF6
SIF2	——	MED16
HFI1	——	ARP6
HFI1	——	HDA2
SNF6	——	SAS5
SAS5	——	RAD6
HAP4.D	——	ARP6
HAP4.D	——	YAF9
ARP6	——	IOC3
ARP6	——	PBS2
HDA2	——	SAS4
HTL1	——	HTL1
IOC3	——	SWD1
JHD1	——>	CDC73
JHD1	——>	MSI1
JHD1	——>	TUP1
SWI3	——>	SFP1
SWI3	——>	PTC1DELPTC2
CBF1	——>	CRZ1
CBF1	——>	RFX1
CBF1	——>	SPT3
CBF1	——>	HAL5DELSAT4
CBF1	——>	SLT2DELPTP3
HAA1	——>	YHP1
YAP3	——>	IES6
DIG1	——>	HAP2
DIG1	——>	YHP1.D
FLO8	——>	RTF1
MGA2	——>	RTG2
TAF14	——>	IES2
TAF14	——>	MED31
SIN4	——>	PHO4.D
GAL4	——>	ACA1
RSC1	——>	RTT107
RSC1	——>	EAF5
ARG80	——>	HST1
RPI1	——>	STP4
RPI1	——>	CAF40
RPI1	——>	SET1
RPI1	——>	CTK1
SNF5	——>	EAF7
BAS1	——>	CBF1
BAS1	——>	DUN1DELH3
YPR196W	——>	KSS1
YPR196W	——>	MED9
YPR196W	——>	NOT4
YPR196W	——>	SET2
YML081W	——>	RLF2
YML081W	——>	ISW2
SRB8	——>	MED5
SEF1	——>	SRB8
SEF1	——>	SPT2
SEF1	——>	CCR4
WTM2	——>	SSN2
WTM2	——>	MSI1
SIP3	——>	MED2
SIP3	——>	NOT3
MIG1	——>	STB2
SSN2	——>	RIC1
SNF2	——>	CAD1
SNF2	——>	SWI5
YER184C	——>	OCA1
CAD1	——>	DPB4
CAD1	——>	PHO85
SPT2	——>	SIP3
OTU1	——>	BCK1DELPTP3
ISW1	——>	CKA2
SAS4	——>	SIR3
SAS4	——>	SRB2
SAS4	——>	BRE1
SAS4	——>	RSC30
SAS4	——>	RXT3
DAL81	——>	ULS1
PGD1	——>	SIN3
HST1	——>	RSC2
HST1	——>	SGF73
HST1	——>	SNF2
STB2	——>	ROX1.D
PHO4	——>	FLO8
PHO4	——>	CCR4
SIR3	——>	DEP1
YPR022C	——>	SPT4
YPR022C	——>	HTZ1
RTG3	——>	HOG1
RTG3	——>	MCK1
SWI5	——>	ISW1
RIC1	——>	YPR022C
RIC1	——>	HDA1
UGA3	——>	RIM101
HOG1	——>	SNF5
MAC1	——>	PTC1DELH3
MAC1	——>	RIM15
CDC73	——>	BAS1
CDC73	——>	PHO2
CDC73	——>	YOX1
CDC73	——>	PIP2
HAP2	——>	NNF2
RTT107	——>	SWI4
NRG1	——>	YLR278C
NNF2	——>	SIR1
SAS3	——>	URC2
SIN3	——>	EAF3
AFT2	——>	SPT7
ULS1	——>	YER130C
STB5	——>	GCN5
UME1	——>	JHD1
——R1	——>	GSM1
ISW2	——>	SIR2
ISW2	——>	HFI1
ISW2	——>	SSK2
YER130C	——>	CST6.D
YER130C	——>	BRE2
YER130C	——>	SWC3
TUP1	——>	ISW2
RDS1	——>	CTI6
SIR2	——>	OTU1
SUM1	——>	SOK2.D
SUM1	——>	SNT1
HDA1	——>	NNF2
UME6	——>	MAC1
UME6	——>	MED3
GSM1	——>	EAF1
YHP1	——>	LDB7
SPT3	——>	RGT1
SPT20	——>	CAC2
RIM101	——>	YAP3
RGT1	——>	CAC1
AFT1	——>	MIG1
AFT1	——>	CUP2
AFT1	——>	BUR2
CST6	——>	OAF1
YGR067C	——>	RTG3
SDS3	——>	HST1
CUP2	——>	AFT2
SPT4	——>	HAA1
SPT4	——>	YPR196W
SPT4	——>	ISW1
SPT4	——>	BCK1DELCLA4
SPT4	——>	KIN3
SPT4	——>	PTC1
OAF1	——>	RPI1
STP1	——>	SEF1
STP1	——>	NHP10
RLF2	——>	RSC1
RLF2	——>	PHO4
RLF2	——>	PHD1
STP4	——>	IES3
YLR278C	——>	ARG80
YDR266C	——>	YML081W
YDR266C	——>	WTM2
YDR266C	——>	UME6
URC2	——>	ADA2
URC2	——>	ITC1
SIR1	——>	DAL81
SWI4	——>	STP2.D
SWI4	——>	SIR4
DOT6	——>	LEO1
SRB2	——>	MED1
PHO2	——>	MED15
YOX1	——>	SPT3
YOX1	——>	WTYVSWT
KSS1	——>	CDC73
SFP1	——>	ADR1.D
CRZ1	——>	DUN1
ACA1	——>	NRG1
GLN3	——>	SSN6
PIP2	——>	CST6
PIP2	——>	LGE1
PIP2	——>	MED20
PIP2	——>	PHO23
PIP2	——>	RCO1
PIP2	——>	SET2
RFX1	——>	RFM1
RFX1	——>	PTP2DELPTP3
PHD1	——>	GCN4.D
MSI1	——>	TAF14
ADR1.D	——>	SLT2DELCLA4
CST6.D	——>	UGA3
CST6.D	——>	UME1
CST6.D	——>	YDR266C
CST6.D	——>	SAP30
GCN4.D	——>	RTT109
PHO4.D	——>	SAS5
PHO4.D	——>	SIN3
PHO4.D	——>	ARK1DELPRK1
ROX1.D	——>	SIR3
ROX1.D	——>	ARK1DELPRK1
SOK2.D	——>	RXT2
STP2.D	——>	YER184C
STP2.D	——>	NPL6
STP2.D	——>	SAS2
STP2.D	——>	SIN3
YHP1.D	——>	SNF2
YHP1.D	——>	HDA1
ADA2	——>	MGA2
ADA2	——>	MED9
ASF1	——>	GLN3
ASF1	——>	SNF12
ASF1	——>	KSS1DELFUS3DELHOG1
BRE1	——>	YER184C
BRE1	——>	R1
BRE2	——>	DOT6
BUR2	——>	R3
BUR2	——>	ELM1
BUR2	——>	FUS3
CAC1	——>	SAS3
CAC2	——>	NGG1
CAF40	——>	SIR2
CCR4	——>	SPT20
CDC73	——>	RTT106
CTI6	——>	SPT20
CTR9	——>	SUM1
CTR9	——>	SUS1
DEP1	——>	HOG1
DPB4	——>	SNF5
DPB4	——>	FAB1
DPB4	——>	SKY1
EAF1	——>	STP1
EAF1	——>	FUS3DELKSS1
EAF1	——>	SNF1
EAF3	——>	SWR1
EAF5	——>	SAS4
EAF5	——>	RDS1
EAF7	——>	DIG1
EAF7	——>	SUM1
EAF7	——>	HSL1DELCLA4
GCN5	——>	MED18
HDA1	——>	GAL4
HDA1	——>	TUP1
HDA1	——>	VPS72
HDA3	——>	DUN1
HFI1	——>	STB5
HFI1	——>	AFT1
HFI1	——>	GLN3
HFI1	——>	RSC1
HFI1	——>	SDC1
HFI1	——>	SPT3
HST1	——>	ASF1
HST1	——>	IES5
HST1	——>	PAF1
HTZ1	——>	VPS71
HTZ1	——>	CDK8
IES2	——>	SNF1DELRIM11
IES3	——>	SPT8
IES5	——>	YGR067C
IES6	——>	SWI3
ISW1	——>	PGD1
ISW2	——>	SGF29
ISW2	——>	SNF6
ISW2	——>	PBS2DELPTK2
ITC1	——>	SIN4
ITC1	——>	SDS3
LDB7	——>	CTR9
LDB7	——>	HDA3
LDB7	——>	SIT4
