# Supplementary material
Source: publisher figshare collection journal article supplement (https://plos.figshare.com/articles/dataset/_/790268)
Supplement: Supplementary file 1 [file 1 › Table_S7.xlsx]

## Sheet: Table S7
Table S7 Edges inferred by DM_BN (w=10)
IXR1	——	SIR3
IXR1	——	SIR2
IXR1	——	SDS3
IXR1	——	HFI1
CBF1	——	RGM1
FLO8	——	RGM1
FLO8	——	YER184C
FLO8	——	YER130C
FLO8	——	SWI4
MGA2	——	CST6
CAC2	——	RLF2
ARG80	——	RGM1
RGM1	——	RPI1
RGM1	——	YPR196W
RGM1	——	WTM2
RGM1	——	YER184C
RGM1	——	YER130C
RGM1	——	RDS1
RGM1	——	CUP2
RGM1	——	SWI4
RPI1	——	YPR196W
YPR196W	——	RDS1
SRB8	——	SSN2
WTM2	——	RDS1
SNF2	——	SNF6
SNF2	——	SPT20
SNF2	——	CST6
SNF2	——	SDS3
SNF2	——	HFI1
PIP2	——	ISW2
SNF6	——	SPT20
SNF6	——	CST6
DAL81	——	UGA3
DAL81	——	YGR067C
DAL81	——	CRZ1
SIR3	——	SIR2
SIR3	——	SDS3
SIR3	——	HFI1
RTG3	——	UGA3
RTG3	——	CRZ1
UGA3	——	CRZ1
NRG1	——	YGR067C
AFT2	——	YGR067C
AFT2	——	CRZ1
SIR2	——	SDS3
SIR2	——	HFI1
SPT20	——	CST6
SPT20	——	HFI1
AFT1	——	YGR067C
YGR067C	——	OAF1
YGR067C	——	CRZ1
SDS3	——	HFI1
CST6	——	SOK2
SOK2	——	RTT109
SOK2	——	CDK8
ARP6	——	HTZ1
ARP6	——	SWC5
ARP8	——	IES6
BUR2	——	CTR9
BUR2	——	PAF1
CAC1	——	CAC2
CCR4	——	RTT109
CDC73	——	CTR9
CTI6	——	RXT2
CTR9	——	PAF1
CTR9	——	RTF1
CTR9	——	CTK1
DEP1	——	PHO23
DEP1	——	RPD3
DEP1	——	RXT2
DEP1	——	SAP30
DEP1	——	SDS3
DEP1	——	SIN3
EAF1	——	RTT109
EAF3	——	RCO1
HDA1	——	HDA2
HDA1	——	HDA3
HDA2	——	HDA3
HST1	——	RFM1
HTZ1	——	SAS5
HTZ1	——	SWC5
HTZ1	——	SWR1
HTZ1	——	VPS72
IES2	——	IES3
IES2	——	IES6
IES2	——	RTT109
IES3	——	NHP10
IES3	——	RTT109
ITC1	——	STE11
LDB7	——	RSC30
MED18	——	MED31
MED2	——	MED3
PHO23	——	RXT2
PHO23	——	SAP30
PHO23	——	SDS3
RCO1	——	SET2
RPD3	——	SAS4
RPD3	——	SDS3
RPD3	——	SIN3
RTT109	——	CDK8
RXT2	——	SAP30
SAP30	——	SDS3
SAP30	——	SIN3
SAS2	——	SAS4
SAS2	——	SAS5
SAS4	——	SAS5
SDS3	——	SIN3
SET1	——	SWD3
SET2	——	CTK1
SIR2	——	SIR3
SIR2	——	SIR4
SIR2	——	STE11
SIR2	——	STE7
SIR3	——	SIR4
SIR3	——	STE11
SIR3	——	STE7
SIR4	——	STE11
SNF12	——	SWI3
SWC5	——	SWR1
SWC5	——	VPS71
SWC5	——	VPS72
SWC5	——	YAF9
FUS3DELKSS1	——	KSS1DELFUS3DELHOG1
FUS3DELKSS1	——	STE11
FUS3DELKSS1	——	STE20
FUS3DELKSS1	——	STE7
KSS1DELFUS3DELHOG1	——	STE11
PTC1DELPDH3	——	VPS15
STE11	——	STE20
STE11	——	STE7
STE20	——	STE7
IXR1	——>	SNF5
IXR1	——>	CAD1
IXR1	——>	SAS3
IXR1	——>	SPT10
IXR1	——>	SPT3
TAF14	——>	GLN3
SIN4	——>	SAS3
SNF5	——>	SWI3
SNF5	——>	TUP1
YPR196W	——>	SPT2
YPR196W	——>	YLR278C
WTM2	——>	YLR278C
SNF2	——>	SWI3
SNF2	——>	SNF5
CAD1	——>	MAC1
CAD1	——>	UME6
CAD1	——>	GSM1
CAD1	——>	SPT4
CAD1	——>	SIR1
SNF6	——>	SIN4
SNF6	——>	SNF5
SNF6	——>	TUP1
SNF6	——>	SPT3
PGD1	——>	SEF1
SIR3	——>	BAS1
SIR3	——>	SAS3
SIR3	——>	SPT10
SIR3	——>	TUP1
SIR3	——>	SPT3
SIR3	——>	SIR1
NNF2	——>	STP4
SAS3	——>	HAA1
SAS3	——>	BAS1
SAS3	——>	CAD1
SAS3	——>	PGD1
SAS3	——>	SPT4
SPT10	——>	SFP1
TUP1	——>	SWI3
TUP1	——>	SIN4
RDS1	——>	YLR278C
SUM1	——>	HST1
SPT3	——>	SNF5
SPT3	——>	BAS1
SPT3	——>	CAD1
SPT3	——>	SAS3
SPT3	——>	ULS1
SPT3	——>	SPT10
SPT3	——>	SPT4
CST6	——>	SPT10
CST6	——>	SFP1
SDS3	——>	CAD1
YLR278C	——>	SPT2
YLR278C	——>	YDR266C
SIR1	——>	HAA1
SIR1	——>	MAC1
SIR1	——>	UME6
SIR1	——>	GSM1
SIR1	——>	KSS1
KSS1	——>	NNF2
HFI1	——>	SPT3
ADA2	——>	GCN5
ADA2	——>	SGF29
ASF1	——>	RTT106
ASF1	——>	DUN1DELPDH3
ASF1	——>	HAL5DELSAT4
BRE1	——>	LGE1
BRE1	——>	SET1
BRE1	——>	SWD3
CAC1	——>	RTT106
CAC2	——>	ASF1
CTR9	——>	RAD6
HFI1	——>	SPT20
HFI1	——>	SPT7
HST1	——>	HST1
HST1	——>	SUM1
HTL1	——>	LDB7
HTL1	——>	RSC30
MED1	——>	MED5
MED15	——>	MED2
MED15	——>	MED3
MED2	——>	SPT3
MED20	——>	MED18
MED20	——>	MED31
MED3	——>	MED16
MED3	——>	MED20
MED9	——>	MED1
MED9	——>	CKA2
MSI1	——>	CAC1
MSI1	——>	CAC2
MSI1	——>	RTT106
NGG1	——>	ADA2
NGG1	——>	GCN5
NPL6	——>	HTL1
NPL6	——>	RSC2
RAD6	——>	BRE1
RFM1	——>	SUM1
RFM1	——>	MSI1
RSC2	——>	MED9
RSC2	——>	RSC1
RTF1	——>	BRE1
RTF1	——>	LGE1
RTT109	——>	RSC2
RTT109	——>	SNF6
RTT109	——>	TUP1
RTT109	——>	ARK1DELPRK1
RTT109	——>	PTP2DELPTP3
SET1	——>	BRE2
SET1	——>	ISW1
SET1	——>	SDC1
SET1	——>	SWD1
SNF12	——>	HFI1
SNF12	——>	MED16
SNF12	——>	SNF2
SNF2	——>	SNF5
SNF2	——>	SPT7
SNF6	——>	SNF12
SNF6	——>	SWI3
SPT20	——>	ADA2
SPT20	——>	NGG1
SPT3	——>	SPT8
SPT7	——>	MED15
SPT7	——>	SGF73
SPT7	——>	SPT20
SPT7	——>	SPT3
SSN6	——>	ARK1DELPRK1
SUM1	——>	HST1
SUM1	——>	RFM1
SWD1	——>	SDC1
SWD3	——>	BRE2
SWD3	——>	SUM1
SWD3	——>	SWD1
SWI3	——>	SNF2
SWI3	——>	SNF5
TUP1	——>	NGG1
TUP1	——>	SSN6
ARK1DELPRK1	——>	NOT4
ARK1DELPRK1	——>	MIH1DELELM1
ARK1DELPRK1	——>	PTC1DELPDH3
ARK1DELPRK1	——>	VPS15
BCK1DELCLA4	——>	SLT2DELCLA4
CDK8	——>	MED1
CDK8	——>	MED9
CDK8	——>	RSC2
CDK8	——>	TUP1
CDK8	——>	PTC1DELPDH3
CDK8	——>	VPS15
ELM1	——>	DUN1
HAL5DELSAT4	——>	MED15
HAL5DELSAT4	——>	PBS2DELPTK2
HSL1DELCLA4	——>	ASF1
HSL1DELCLA4	——>	RAD6
HSL1DELCLA4	——>	MIH1DELELM1
KIN3	——>	FAB1
PBS2DELPTK2	——>	PBS2
PTC1	——>	NPL6
PTC1	——>	PTP2DELPTP3
PTC1	——>	YPK1
PTC1DELPDH3	——>	PTC1
PTC1DELPDH3	——>	PTC1DELPTC2
PTC1DELPTC2	——>	PTC1
PTP2DELPTP3	——>	CKA2
PTP2DELPTP3	——>	ELM1
PTP2DELPTP3	——>	HSL1DELCLA4
PTP2DELPTP3	——>	YPK1
SLT2DELPTP3	——>	BCK1DELCLA4
SLT2DELPTP3	——>	BCK1DELPTP3
SLT2DELPTP3	——>	HAL5DELSAT4
SLT2DELPTP3	——>	PHO85
STE11	——>	SNF6
STE11	——>	TUP1
STE11	——>	PBS2DELPTK2
VPS15	——>	EAF7
VPS15	——>	HSL1DELCLA4
VPS15	——>	PTP2DELPTP3
VPS15	——>	YPK1
YPK1	——>	NPL6
YPK1	——>	KIN3
YPK1	——>	SLT2DELPTP3
