# Supplementary material
Source: publisher figshare collection journal article supplement (https://plos.figshare.com/articles/dataset/_/790268)
Supplement: Supplementary file 1 [file 1 › Table_S8.xlsx]

## Sheet: Table S8
Table S8 edges inferred by WinMine (kappa=0.05)
BRE1	——	LGE1
SPT20	——	HFI1
SPT20	——	SNF6
SPT20	——	CST6
SPT20	——	SNF2
PTP2DELPTP3	——	CKA2
PTP2DELPTP3	——	PTC1
RDS2	——	YKL222C
ARP8	——	IES6
STB3	——	SSN3
GZF3	——	GZF3.D
HFI1	——	LEU3
IES2	——	IES6
CHK1	——	IRE1
EAF1	——	IES6
OCA1	——	SIW14
SNF6	——	CST6
SNF6	——	SIN4
SNF6	——	SNF2
SNF6	——	SNF11
PTC1DELPTC2	——	PTC1
HAC1.D	——	MSN2.D
SNF12	——>	SWI3
SNF12	——>	HFI1
SNF12	——>	FUS3
SNF12	——>	SNF2
SNF12	——>	MED16
SET2	——>	RCO1
SIN3	——>	RPD3
SWI3	——>	SNF5
SIR2	——>	STE11
HDA3	——>	HDA1
CDK8	——>	PTP2DELPTP3
CDK8	——>	CKA2
CDK8	——>	SOK2.D
CDK8	——>	MED1
CDK8	——>	VPS15
CDK8	——>	CTK1
CDK8	——>	PTC1DELPTC2
CDK8	——>	TUP1
CDK8	——>	PTC1
ACA1	——>	YAP3
CAC2	——>	MSI1
BRE1	——>	RTF1
BRE1	——>	SET1
OAF1	——>	HOG1
OAF1	——>	RPH1
VPS72	——>	SWC3
VPS72	——>	SWR1
YER184C	——>	NOT3
PHO23	——>	SAP30
ISW2	——>	GAL4
YGR067C	——>	AFT1
CMK2	——>	RIM11
CMK2	——>	RIM15
PTP2DELPTP3	——>	CAC2
PTP2DELPTP3	——>	CLA4
PTP2DELPTP3	——>	YPK1
PTP2DELPTP3	——>	KSS1DELFUS3DELHOG1
PTP2DELPTP3	——>	ARK1DELPRK1
PTP2DELPTP3	——>	HSL1DELCLA4
RIM11	——>	BCK1
EAF7	——>	CTI6
EAF7	——>	EAF5
CKA2	——>	TPK2
CAD1	——>	GSM1
CAD1	——>	RIM101
CTI6	——>	RXT2
CTI6	——>	MCK1
SAS5	——>	SAS5
SAS5	——>	SWC5
SAS5	——>	SAS4
AFT2	——>	YGR067C
AFT2	——>	MIG1
MED5	——>	MED16
DLS1	——>	DPB4
SIR4	——>	SIR3
SIR4	——>	YHP1.D
SOK2.D	——>	CST6.D
SOK2.D	——>	GIS1.D
SOK2.D	——>	ROX1.D
HAT2	——>	GAL11
SNT1	——>	CAF130
SNT1	——>	SIF2
MED9	——>	RSC2
ITC1	——>	DLS1
ITC1	——>	ISW2
HFI1	——>	SIT4
HFI1	——>	SPT20
HFI1	——>	SPT8
SIF2	——>	NUT1
SAS3	——>	SPT4
SAS3	——>	PGD1
OTU1	——>	RDR1
OTU1	——>	STB4
BAS1	——>	GCR2
BAS1	——>	PHO2
SNF6	——>	SNF12
SWI3	——>	TUP1
RFX1	——>	RFX1.D
RFX1	——>	HDA1
SPT4	——>	HAP2
ARG81	——>	MSN1
PHO23	——>	NGG1
CRZ1	——>	AFT2
CRZ1	——>	UGA3
SPT7	——>	SNF2
SPT7	——>	SGF73
CDC73	——>	LEO1
CDC73	——>	SNT1
SPT2	——>	OTU1
SPT2	——>	YDR049W
SPT2	——>	SUT2
SPT2	——>	MIG3
SPT2	——>	MSI1
NPL6	——>	GCN5
NPL6	——>	HTL1
NPL6	——>	YVH1
NPL6	——>	RSC1
STE11	——>	STE20
MAC1	——>	FLO8
MAC1	——>	GAT3
PHO4.D	——>	SFP1.D
PHO4.D	——>	XBP1.D
PHO4.D	——>	ADR1.D
HFI1	——>	HFI1
HFI1	——>	SNF5
HFI1	——>	IXR1
HFI1	——>	SPT3
HDA1	——>	HDA2
RTT107	——>	HAT2
CBF1	——>	RSC1
CBF1	——>	MGA2
PAF1	——>	CTR9
SIR3	——>	SIR2
SAS5	——>	SAS4
YFL052W	——>	HIR1
SRB8	——>	SSN2
SRB8	——>	MAL33
SRB8	——>	CSE2
CAC1	——>	CAC2
YHP1.D	——>	PHO4.D
YHP1.D	——>	STP2.D
YHP1.D	——>	MSN4.D
YHP1.D	——>	HMS1.D
YHP1.D	——>	WTMATAVSWT
YHP1.D	——>	STE12.D
YHP1.D	——>	SKN7.D
YHP1.D	——>	DIG1
YHP1.D	——>	SWI4.D
CTR9	——>	CDC73
CTR9	——>	CTK1
CTR9	——>	RAD6
CTR9	——>	RTF1
MSN4.D	——>	GIS2.D
MED1	——>	CAF40
MED1	——>	MED5
MED1	——>	MED9
MED1	——>	NOT3
RSC2	——>	NOT4
RSC2	——>	NPL6
RSC2	——>	BUR2
RSC2	——>	DUN1
DEP1	——>	SIN3
DEP1	——>	SDS3
IES2	——>	RTT109
YPK1	——>	NPL6
YPK1	——>	KIN3
YPK1	——>	BCK1DELPTP3
YPK1	——>	ELM1
NHP10	——>	IES5
MED31	——>	MED18
MED18	——>	MED20
SWI5	——>	PHD1
RLF2	——>	CAC2
HAP4.D	——>	ZAP1.D
HAP4.D	——>	SUT1.D
RGM1	——>	YER184C
RGM1	——>	CUP2
RGM1	——>	CBF1
RGM1	——>	SWI4
RGM1	——>	ARG80
RGM1	——>	WTM2
YDR049W	——>	JHD1
SMK1	——>	YOX1
DAL81	——>	CRZ1
DAL81	——>	NRG1
KSS1DELFUS3DELHOG1	——>	HOG1
SPT3	——>	SPT7
SPT3	——>	MED3
SIR3	——>	SAS3
SIR3	——>	SWI6
SIR3	——>	SDS3
SIR3	——>	SIR1
SIR3	——>	SIR2
SIR3	——>	IXR1
SIR3	——>	SPT10
YPR196W	——>	RDS1
YPR196W	——>	YLR278C
YPR196W	——>	RPI1
SLT2DELPTP3	——>	BCK1DELCLA4
HST1	——>	RFM1
VPS15	——>	EAF7
VPS15	——>	RSC2
VPS15	——>	FAB1
PBS2DELPTK2	——>	HAL5DELSAT4
SUT2	——>	SKO1
SUT2	——>	SNT2
MIG1	——>	SNF1
RPD3	——>	SAS5
RPD3	——>	SDS3
RPD3	——>	SIN3
ARG80	——>	ARG81
ACE2	——>	GLN3
HOG1	——>	PBS2
RSC1	——>	SIF2
RSC1	——>	CDC73
MGA2	——>	RIC1
SIR1	——>	HAA1
SIR1	——>	PIB2
SUM1	——>	DAL81
SUM1	——>	HST1
FUS3	——>	PTK2
FUS3DELKSS1	——>	KSS1DELFUS3DELHOG1
PTC1DELPDH3	——>	ARK1DELPRK1
SNF2	——>	SWI3
SNF2	——>	SNF5
TUP1	——>	TUP1
ADR1.D	——>	HAP4.D
ADR1.D	——>	GCN4.D
PGD1	——>	PHO23
PGD1	——>	GCN4
PGD1	——>	SEF1
ISW1	——>	IOC3
STB2	——>	SOK2
STB2	——>	SMK1
BCK1DELPTP3	——>	CMK2
BCK1DELPTP3	——>	SLT2DELPTP3
ASF1	——>	RTT106
FAB1	——>	YCK3
SWD3	——>	HST1
SWD3	——>	BRE2
SWD3	——>	SWD1
ADA2	——>	GCN5
ADA2	——>	MED9
ADA2	——>	SGF29
ADA2	——>	SUS1
RCO1	——>	EAF3
BCK1DELCLA4	——>	SLT2DELCLA4
SIF2	——>	MOT3.D
RXT2	——>	SIN3
RXT2	——>	PHO23
RXT2	——>	RXT3
SPT20	——>	CCR4
SPT20	——>	SPT7
SPT20	——>	NGG1
SPT20	——>	WTYPDVSWT
HTZ1	——>	YAF9
HTZ1	——>	VPS71
ISW1	——>	ACE2
CST6	——>	MGA2
CST6	——>	SFP1
CST6	——>	RTT109
CST6	——>	SIN3
CST6	——>	SPT10
RFM1	——>	SUM1
STB5	——>	ISW1
GLN3	——>	TAF14
UGA3	——>	EDS1
UGA3	——>	PHO4
UGA3	——>	SIP3
UGA3	——>	RTG3
SWC5	——>	VPS72
SWC5	——>	HTZ1
SWC5	——>	ARP6
PHD1	——>	RGT1
SET2	——>	RCO1
HTL1	——>	RSC30
HTL1	——>	LDB7
SKN7.D	——>	MBP1.D
DIG1	——>	SIR3
BUR2	——>	PAF1
CTK1	——>	SET2
YLR278C	——>	ZAP1
YLR278C	——>	SPT2
YLR278C	——>	SRB8
YLR278C	——>	YDR266C
NRG1	——>	OAF1
NRG1	——>	PDR1
NRG1	——>	GAL80
NRG1	——>	STP1
GCN4	——>	SWI5
MED15	——>	BUR2
MED15	——>	HAL5DELSAT4
LDB7	——>	RSC30.D
PTC1DELPTC2	——>	PTC1DELPDH3
STE7	——>	FUS3DELKSS1
SIN4	——>	SAS3
SIN4	——>	TUP1
STP1	——>	SRB2
STP1	——>	UME1
STP1	——>	YML081W
RGT1	——>	ACA1
RGT1	——>	ARO80
RGT1	——>	RTT107
RGT1	——>	ESC2
RAD6	——>	BRE1
RAD6	——>	LGE1
IES3	——>	NHP10
MED3	——>	CHD1
MED3	——>	MED2
ARK1DELPRK1	——>	NOT4
ARK1DELPRK1	——>	YPK1
ARK1DELPRK1	——>	VPS15
ARK1DELPRK1	——>	MIH1DELELM1
ARK1DELPRK1	——>	SSN6
ARK1DELPRK1	——>	HSL1DELCLA4
SAP30	——>	DEP1
SNF5	——>	SWI3
SNF5	——>	SPT3
RTT109	——>	CDK8
RTT109	——>	CCR4
RTT109	——>	SNF6
RTT109	——>	IES3
SSN6	——>	SNF12
SSN6	——>	MED15
RDR1	——>	DOT6
WTM2	——>	YPR196W
SIR2	——>	MAC1
SIR2	——>	NNF2
SIR2	——>	PIP2
STE11	——>	PBS2DELPTK2
STE11	——>	STE7
FLO8	——>	YER130C
FLO8	——>	RGM1
NGG1	——>	ADA2
SAS4	——>	SAS2
MED16	——>	MED3
MBF1	——>	YHP1
MBF1	——>	YFL052W
SNF1DELRIM11	——>	SNF1
GAT3	——>	YAP1
GAT3	——>	CHA4
IXR1	——>	CAD1
DUN1	——>	ELM1
MIG3	——>	STB2
YML081W	——>	OPI1
NNF2	——>	KSS1
NNF2	——>	STP4
RTF1	——>	RTG2
PIP2	——>	ISW2
PIP2	——>	THI2
PBS2	——>	PBS2DELPTK2
PBS2	——>	SSK2
SMP1	——>	ROX1
MED2	——>	MED15
TAF14	——>	HAP5
PHO4	——>	RFX1
HAL5DELSAT4	——>	SKY1
HAL5DELSAT4	——>	MED31
HAL5DELSAT4	——>	SLT2DELPTP3
HAL5DELSAT4	——>	DUN1DELPDH3
HAL5DELSAT4	——>	SNF1DELRIM11
HAL5DELSAT4	——>	PHO85
SPT3	——>	ULS1
SPT3	——>	UME6
SPT3	——>	SIR3
CSE2	——>	RSC2
CSE2	——>	CKA1
SPT8	——>	MED31
SPT8	——>	SPT3
SET1	——>	ISW1
SET1	——>	SWD3
RTG3	——>	MSS11
YAP3	——>	STB5
YAP3	——>	SKN7
GAL4	——>	CUP9
GAL4	——>	YAP7
EAF3	——>	SET2
HSL1DELCLA4	——>	MIH1DELELM1
HSL1DELCLA4	——>	ASF1
HSL1DELCLA4	——>	RAD6
CUP9	——>	ZDS1
TUP1	——>	HDA3
TUP1	——>	SIR4
TUP1	——>	ITC1
TUP1	——>	SNF6
TUP1	——>	SSN6
TUP1	——>	NGG1
STP4	——>	YPR022C
STP4	——>	URC2
STP4	——>	MBF1
MSI1	——>	RLF2
MSI1	——>	SMP1
PTC1	——>	KSP1
SWD1	——>	SDC1
SWD1	——>	SGF73
SNF2	——>	SWI3
SNF2	——>	SNF5
SUM1	——>	SUM1
SPT10	——>	ISW2
SPT10	——>	BAS1
SPT10	——>	SFP1
RTT106	——>	CAC1
