# Supplementary material
Source: publisher figshare collection journal article supplement (https://plos.figshare.com/articles/dataset/_/790268)
Supplement: Supplementary file 1 [file 1 › Table_S9.xlsx]

## Sheet: Table S9_edges in
Table S9 edges inferred by DM_BN (w=8)
IXR1	——	SIR3
IXR1	——	SIR2
CAC2	——	RLF2
RGM1	——	YER184C
RGM1	——	YER130C
RGM1	——	CUP2
RGM1	——	SWI4
SRB8	——	SSN2
SIP3	——	UGA3
SIP3	——	YGR067C
SNF2	——	SNF6
SNF2	——	SPT20
SNF2	——	CST6
YER184C	——	YER130C
PIP2	——	ISW2
SNF6	——	SPT20
SNF6	——	CST6
DAL81	——	RTG3
DAL81	——	UGA3
DAL81	——	YGR067C
DAL81	——	CRZ1
PHO4	——	UGA3
SIR3	——	SIR2
RTG3	——	UGA3
RTG3	——	CRZ1
UGA3	——	YGR067C
UGA3	——	CRZ1
NRG1	——	YGR067C
SIN3	——	CST6
AFT2	——	YGR067C
AFT2	——	CRZ1
YER130C	——	CUP2
RDS1	——	YLR278C
SUM1	——	HST1
SUM1	——	RFM1
SPT20	——	CST6
AFT1	——	YGR067C
CST6	——	RTT109
YGR067C	——	OAF1
YGR067C	——	STP1
YGR067C	——	CRZ1
OAF1	——	CRZ1
ADA2	——	GCN5
ADA2	——	NGG1
ADA2	——	SGF29
ADA2	——	SPT20
ARP6	——	SWC5
ARP6	——	SWR1
ARP6	——	VPS72
ARP8	——	IES6
BRE2	——	SWD1
BUR2	——	CTR9
BUR2	——	PAF1
CCR4	——	RTT109
CDC73	——	CTR9
CDC73	——	RTF1
CTR9	——	PAF1
CTR9	——	RTF1
CTR9	——	CTK1
DEP1	——	PHO23
DEP1	——	RXT2
DEP1	——	SAP30
DEP1	——	SDS3
EAF1	——	RTT109
EAF3	——	RCO1
EAF3	——	SET2
GCN5	——	NGG1
HDA1	——	HDA2
HDA1	——	HDA3
HDA2	——	HDA3
HFI1	——	SNF12
HFI1	——	SPT20
HFI1	——	SPT7
HST1	——	RFM1
IES2	——	IES6
IES2	——	RTT109
IES6	——	RTT109
LDB7	——	RSC30
MED18	——	MED31
MED2	——	MED3
NGG1	——	SNF12
NGG1	——	SPT20
PHO23	——	RXT2
PHO23	——	SAP30
PHO23	——	SDS3
RCO1	——	SET2
RXT2	——	SAP30
SAP30	——	SDS3
SET1	——	SWD3
SET2	——	CTK1
SIR2	——	SIR4
SIR2	——	STE11
SIR2	——	STE7
SIR4	——	STE11
SNF12	——	SPT20
SPT20	——	SPT7
SWC5	——	SWR1
SWC5	——	VPS72
FUS3DELKSS1	——	STE20
STE11	——	STE7
IXR1	——>	SNF5
IXR1	——>	CAD1
IXR1	——>	SAS3
IXR1	——>	SPT10
IXR1	——>	SPT3
CBF1	——>	RPI1
FLO8	——>	RGM1
FLO8	——>	YER184C
FLO8	——>	YER130C
FLO8	——>	CUP2
FLO8	——>	SWI4
TAF14	——>	GLN3
SIN4	——>	SAS3
RGM1	——>	CBF1
RGM1	——>	ARG80
RGM1	——>	RPI1
RGM1	——>	YPR196W
RGM1	——>	WTM2
RGM1	——>	RDS1
RGM1	——>	YLR278C
SNF5	——>	SWI3
SNF5	——>	TUP1
YPR196W	——>	RPI1
YPR196W	——>	SPT2
WTM2	——>	RDS1
WTM2	——>	YLR278C
SNF2	——>	SWI3
SNF2	——>	SNF5
SNF2	——>	TUP1
SNF2	——>	SDS3
SNF2	——>	HFI1
CAD1	——>	MAC1
CAD1	——>	UME6
CAD1	——>	GSM1
CAD1	——>	RIM101
CAD1	——>	SPT4
CAD1	——>	SIR1
SNF6	——>	SIN4
SNF6	——>	SNF5
SNF6	——>	TUP1
SNF6	——>	SPT3
SPT2	——>	YHP1
PGD1	——>	SEF1
SIR3	——>	BAS1
SIR3	——>	MAC1
SIR3	——>	NNF2
SIR3	——>	SAS3
SIR3	——>	SPT10
SIR3	——>	TUP1
SIR3	——>	SPT3
SIR3	——>	SIR1
MAC1	——>	FLO8
NNF2	——>	STP4
NNF2	——>	KSS1
SAS3	——>	HAA1
SAS3	——>	BAS1
SAS3	——>	CAD1
SAS3	——>	PGD1
SAS3	——>	SPT4
SAS3	——>	SIR1
SPT10	——>	SFP1
YER130C	——>	WTM2
TUP1	——>	SWI3
TUP1	——>	SIN4
RDS1	——>	ARG80
RDS1	——>	YPR196W
RDS1	——>	SPT2
SUM1	——>	HST1
SPT3	——>	SNF5
SPT3	——>	BAS1
SPT3	——>	CAD1
SPT3	——>	SAS3
SPT3	——>	ULS1
SPT3	——>	SPT10
SPT3	——>	SPT4
SPT20	——>	HFI1
CST6	——>	MGA2
CST6	——>	SPT10
CST6	——>	SFP1
SDS3	——>	IXR1
SDS3	——>	CAD1
SDS3	——>	SIR3
SDS3	——>	SIR2
SDS3	——>	SPT3
CUP2	——>	ARG80
CUP2	——>	YDR266C
YLR278C	——>	YPR196W
YLR278C	——>	SPT2
YLR278C	——>	YDR266C
SIR1	——>	HAA1
SIR1	——>	MAC1
SIR1	——>	UME6
SIR1	——>	GSM1
SIR1	——>	KSS1
SWI4	——>	CBF1
KSS1	——>	STP4
HFI1	——>	IXR1
HFI1	——>	SNF5
HFI1	——>	SIR3
HFI1	——>	SIR2
HFI1	——>	SPT3
HFI1	——>	SDS3
SOK2.D	——>	CST6.D
ASF1	——>	RTT106
ASF1	——>	DUN1DELPPH3
ASF1	——>	HAL5DELSAT4
ASF1	——>	PHO85
BRE1	——>	LGE1
BRE1	——>	SET1
BRE1	——>	SWD3
BRE2	——>	SDC1
CACC2	——>	ASF1
CACC2	——>	CAC1
CACC2	——>	RTT106
CTR9	——>	RAD6
DEP1	——>	RPD3
DEP1	——>	SIN3
EAF7	——>	CTI6
HDA2	——>	TUP1
HST1	——>	HST1
HTL1	——>	LDB7
HTL1	——>	RSC30
HTZ1	——>	ARP6
HTZ1	——>	SWC5
HTZ1	——>	SWR1
HTZ1	——>	VPS72
HTZ1	——>	YAF9
IES2	——>	IES3
IES2	——>	CKA2
IES3	——>	NHP10
LDB7	——>	RSC1
MED1	——>	MED16
MED1	——>	MED5
MED15	——>	MED2
MED15	——>	MED3
MED2	——>	SPT3
MED20	——>	MED18
MED20	——>	MED31
MED3	——>	MED16
MED3	——>	MED20
MED9	——>	MED1
MED9	——>	CKA2
MSI1	——>	CAC1
MSI1	——>	CACC2
MSI1	——>	RTT106
NGG1	——>	TUP1
NPL6	——>	HTL1
NPL6	——>	RSC2
RAD6	——>	BRE1
RFM1	——>	ISW1
RFM1	——>	MSI1
RPD3	——>	SAS4
RSC2	——>	ASF1
RSC2	——>	MED9
RSC2	——>	NOT4
RSC2	——>	RAD6
RSC2	——>	RSC1
RSC2	——>	HSL1DELCLA4
RTF1	——>	BRE1
RTF1	——>	LGE1
RTT106	——>	CAC1
RTT109	——>	SOK2.D
RTT109	——>	IES3
RTT109	——>	MED1
RTT109	——>	RSC2
RTT109	——>	SNF6
RTT109	——>	TUP1
RTT109	——>	CDK8
RTT109	——>	PTP2DELPTP3
RXT2	——>	CTI6
RXT2	——>	SIN3
SAP30	——>	SIN3
SAS4	——>	HTZ1
SAS4	——>	SAS2
SAS4	——>	SAS5
SAS5	——>	HTZ1
SAS5	——>	SAS2
SDS3	——>	RPD3
SDS3	——>	SIN3
SET1	——>	BRE2
SET1	——>	ISW1
SET1	——>	SDC1
SET1	——>	SGF73
SET1	——>	SUM1
SET1	——>	SWD1
SIN3	——>	RPD3
SIN3	——>	SAS5
SIR3	——>	SIR2
SIR3	——>	SIR4
SIR3	——>	PBS2DELPTK2
SIR3	——>	STE11
SIR3	——>	STE7
SIR4	——>	YHP1.D
SIR4	——>	FUS3DELKSS1
SIR4	——>	STE20
SNF12	——>	MED16
SNF12	——>	SNF2
SNF12	——>	SNF6
SNF12	——>	SWI3
SNF2	——>	SNF5
SNF2	——>	SWI3
SNF6	——>	SIR3
SPT3	——>	SPT8
SPT7	——>	HFI1
SPT7	——>	MED15
SPT7	——>	MED20
SPT7	——>	SGF73
SPT7	——>	SNF2
SPT7	——>	SPT3
SPT7	——>	SPT8
SSN6	——>	ARK1DELPRK1
SSN6	——>	PTC1DELPPH3
SUM1	——>	SUM1
SUM1	——>	HST1
SUM1	——>	RFM1
SWC5	——>	VPS71
SWD1	——>	SDC1
SWD3	——>	BRE2
SWD3	——>	SUM1
SWD3	——>	SWD1
SWI3	——>	SNF5
SWI3	——>	SNF6
TUP1	——>	SSN6
TUP1	——>	CDK8
ARK1DELPRK1	——>	NOT4
ARK1DELPRK1	——>	MIH1DELELM1
ARK1DELPRK1	——>	PTC1DELPTC2
ARK1DELPRK1	——>	VPS15
BCK1DELCLA4	——>	SLT2DELCLA4
CDK8	——>	SOK2.D
CDK8	——>	MED1
CDK8	——>	MED9
CDK8	——>	RSC2
CDK8	——>	PTC1DELPPH3
CDK8	——>	PTP2DELPTP3
CDK8	——>	VPS15
CKA2	——>	IES3
CKA2	——>	DUN1
ELM1	——>	EAF7
ELM1	——>	DUN1
FAB1	——>	YCK3
FUS3DELKSS1	——>	KSS1DELFUS3DELHOG1
HAL5DELSAT4	——>	MED15
HAL5DELSAT4	——>	SLT2DELPTP3
HSL1DELCLA4	——>	ASF1
HSL1DELCLA4	——>	RAD6
HSL1DELCLA4	——>	MIH1DELELM1
KIN3	——>	FAB1
PBS2	——>	HOG1
PBS2DELPTK2	——>	CACC2
PBS2DELPTK2	——>	HAL5DELSAT4
PBS2DELPTK2	——>	PBS2
PTC1	——>	NPL6
PTC1	——>	PTP2DELPTP3
PTC1	——>	YPK1
PTC1DELPPH3	——>	ARK1DELPRK1
PTC1DELPPH3	——>	PTC1
PTC1DELPPH3	——>	PTC1DELPTC2
PTC1DELPPH3	——>	VPS15
PTC1DELPTC2	——>	PTC1
PTP2DELPTP3	——>	MGA2
PTP2DELPTP3	——>	CKA2
PTP2DELPTP3	——>	ELM1
PTP2DELPTP3	——>	HSL1DELCLA4
PTP2DELPTP3	——>	KSS1DELFUS3DELHOG1
PTP2DELPTP3	——>	YPK1
SLT2DELPTP3	——>	BCK1DELCLA4
SLT2DELPTP3	——>	BCK1DELPTP3
SLT2DELPTP3	——>	PHO85
STE11	——>	ITC1
STE11	——>	TUP1
STE11	——>	DUN1DELPPH3
STE11	——>	FUS3
STE11	——>	FUS3DELKSS1
STE11	——>	KSS1DELFUS3DELHOG1
STE11	——>	PBS2DELPTK2
STE11	——>	STE20
STE20	——>	ITC1
STE20	——>	PBS2DELPTK2
STE7	——>	FUS3DELKSS1
STE7	——>	STE20
VPS15	——>	EAF7
VPS15	——>	HSL1DELCLA4
VPS15	——>	PTP2DELPTP3
VPS15	——>	YPK1
YPK1	——>	NPL6
YPK1	——>	KIN3
YPK1	——>	SLT2DELPTP3
