# Supplementary material
Source: publisher figshare collection journal article supplement (https://plos.figshare.com/articles/dataset/_/790268)
Supplement: Supplementary file 1 [file 1 › Table_S11.pdf]

**Table S11 Evaluating the causality predicting performance of BN learning algorithms using known knowledge of the MAPK signaling pathways.**

| Algorithm                                                   | Osmolyte synthesis | Mating, Filamentation | Cell wall remodeling | Precision |        | Recall |        | Fisher test |         |
|-------------------------------------------------------------|--------------------|-----------------------|----------------------|-----------|--------|--------|--------|-------------|---------|
|                                                             |                    |                       |                      | EM*       | CD#    | EM*    | CD#    | P-EM*       | P-CD#   |
| MAPK signaling pathways predicted by WinMine                |                    |                       |                      | 0.4444    | 0.4167 | 0.3333 | 0.2174 | 0.1109      | 0.7012  |
| MAPK signaling pathways predicted by BIC without template   |                    |                       |                      | 0.5000    | 0.5455 | 0.3333 | 0.2609 | 0.0715      | 0.3306  |
| MAPK signaling pathways predicted by BIC with template      |                    |                       |                      | 0.5000    | 0.5455 | 0.3333 | 0.2609 | 0.0715      | 0.3306  |
| MAPK signaling pathways predicted by DM_BN without template |                    |                       |                      | 0.6667    | 0.8333 | 0.3333 | 0.2174 | 0.0239      | 0.0529  |
| MAPK signaling pathways predicted by DM_BN with template    |                    |                       |                      | 0.4545    | 0.8125 | 0.4167 | 0.5652 | 0.0617      | 0.00044 |

Predicted edges that have the same orientations as the known interactions in MAPK signaling pathways are shown as red solid lines; Edges that have consistent directionalities (but through indirect connections in the pathways) are shown as blue solid lines; Edges without any known MAPK pathway knowledge support are shown as blue dashed lines.

EM\*: Precision, Recall and Fisher test results based on the exactly matched edges shown by the red solid lines.

CD#: Precision, Recall and Fisher test results based on the edges with correct directions shown by the solid lines.
