# Supplementary material
Source: publisher figshare collection journal article supplement (https://plos.figshare.com/articles/dataset/_/790268)
Supplement: Supplementary file 1 [file 1 › Table_S12.docx]

**Table S12 The Jaccard similarity between target gene sets of subunits in the SIR complex and kinases in the STE MAPK pathway.**

| **JI(****SIR)** | **JI (****STE)** | *JI*(STE, SIR) |
| --- | --- | --- |
| *JI*(sir2, sir4)=0.75 | *JI*(ste20=-1, afk=-1; ste7)=0.43 | *JI*(ste7, sir2)=0.36 |
| *JI*(sir3, sir4)=0.84 | *JI*(ste20=-1, afk=-1; ste11)=0.53 | *JI*(ste11, sir4)=0.35 |
| *JI*(sir2, sir3)=0.75 | *JI*(ste20, afk)=0.44 | *JI*(ste7∩ste11, sir3)=0.32 |

SIR: SIRComplex

STE: STEmediated MAPK signal transduction pathway.

afk: fus3;kss1, *i.e.*, double mutant of fus3 and kss1.

JI: Jaccard index
