# Supplementary material
Source: publisher figshare collection journal article supplement (https://plos.figshare.com/articles/dataset/_/790268)

Figure S1

A

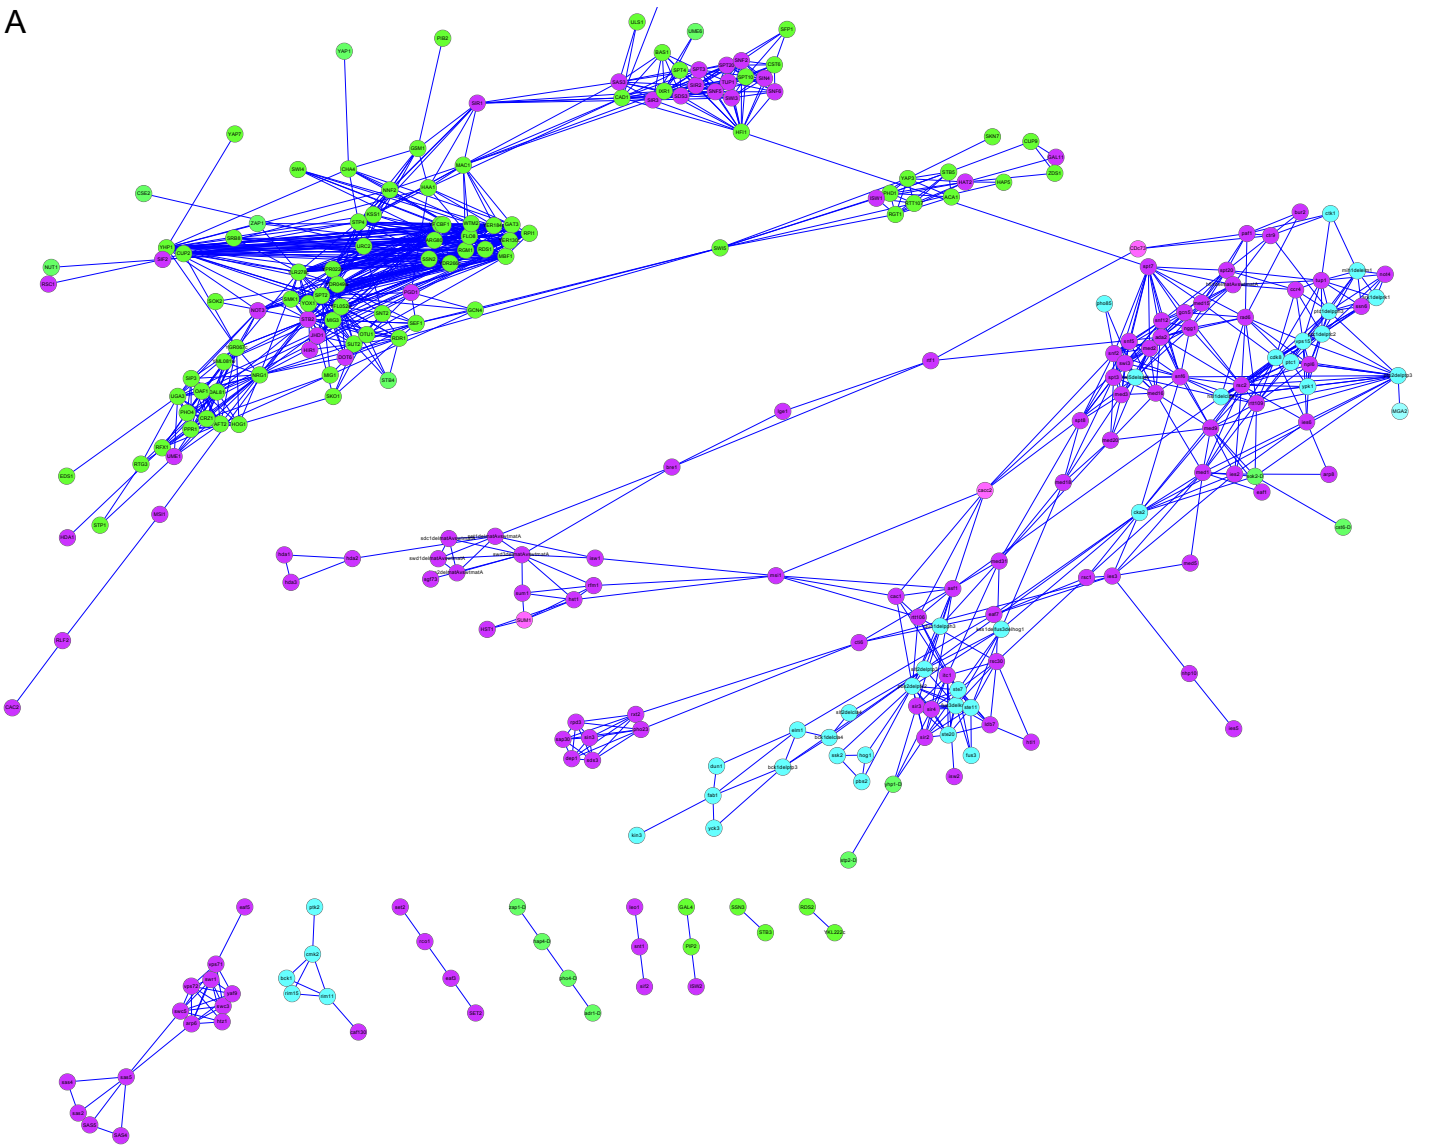

B

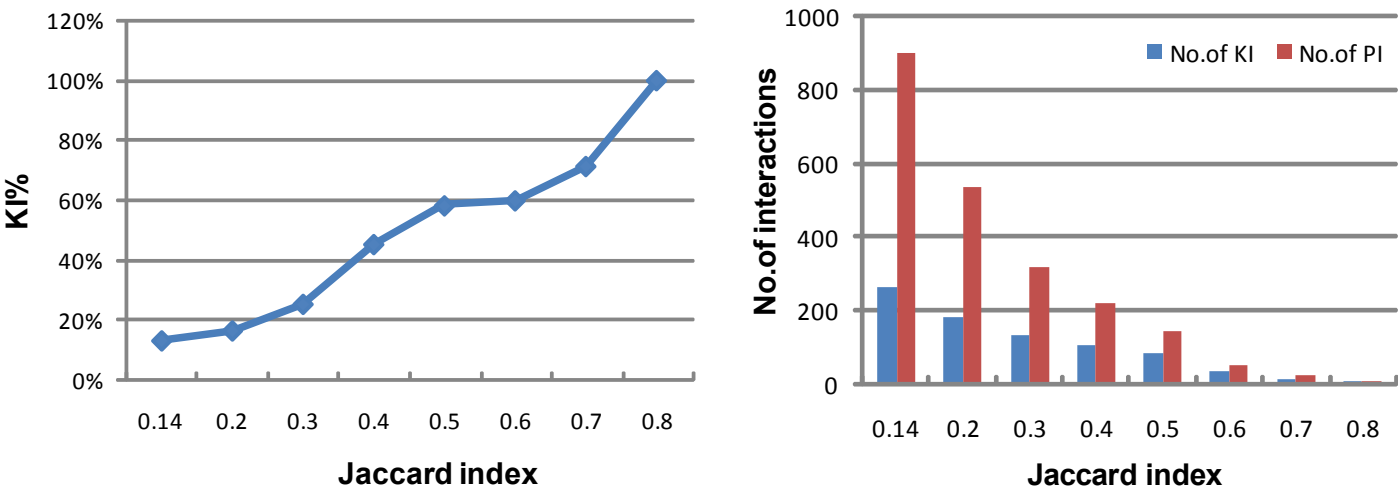

Supplement: Supplementary file 1 [file 1 › Figure_S1.pdf]

Figure S2

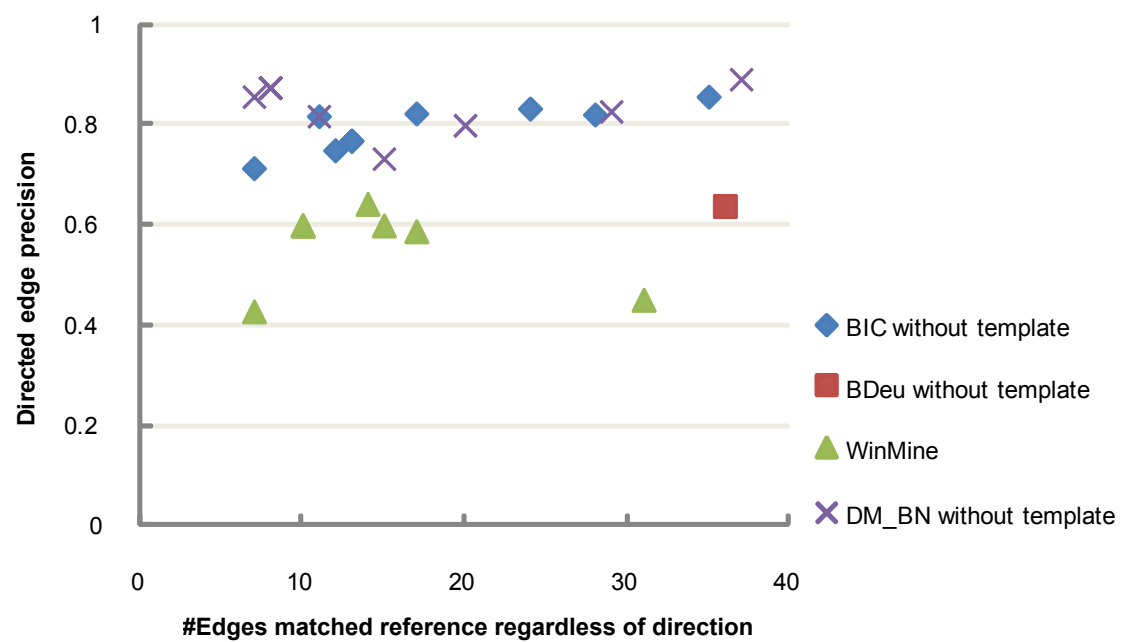

Supplement: Supplementary file 1 [file 1 › Figure_S2.pdf]

Figure S3

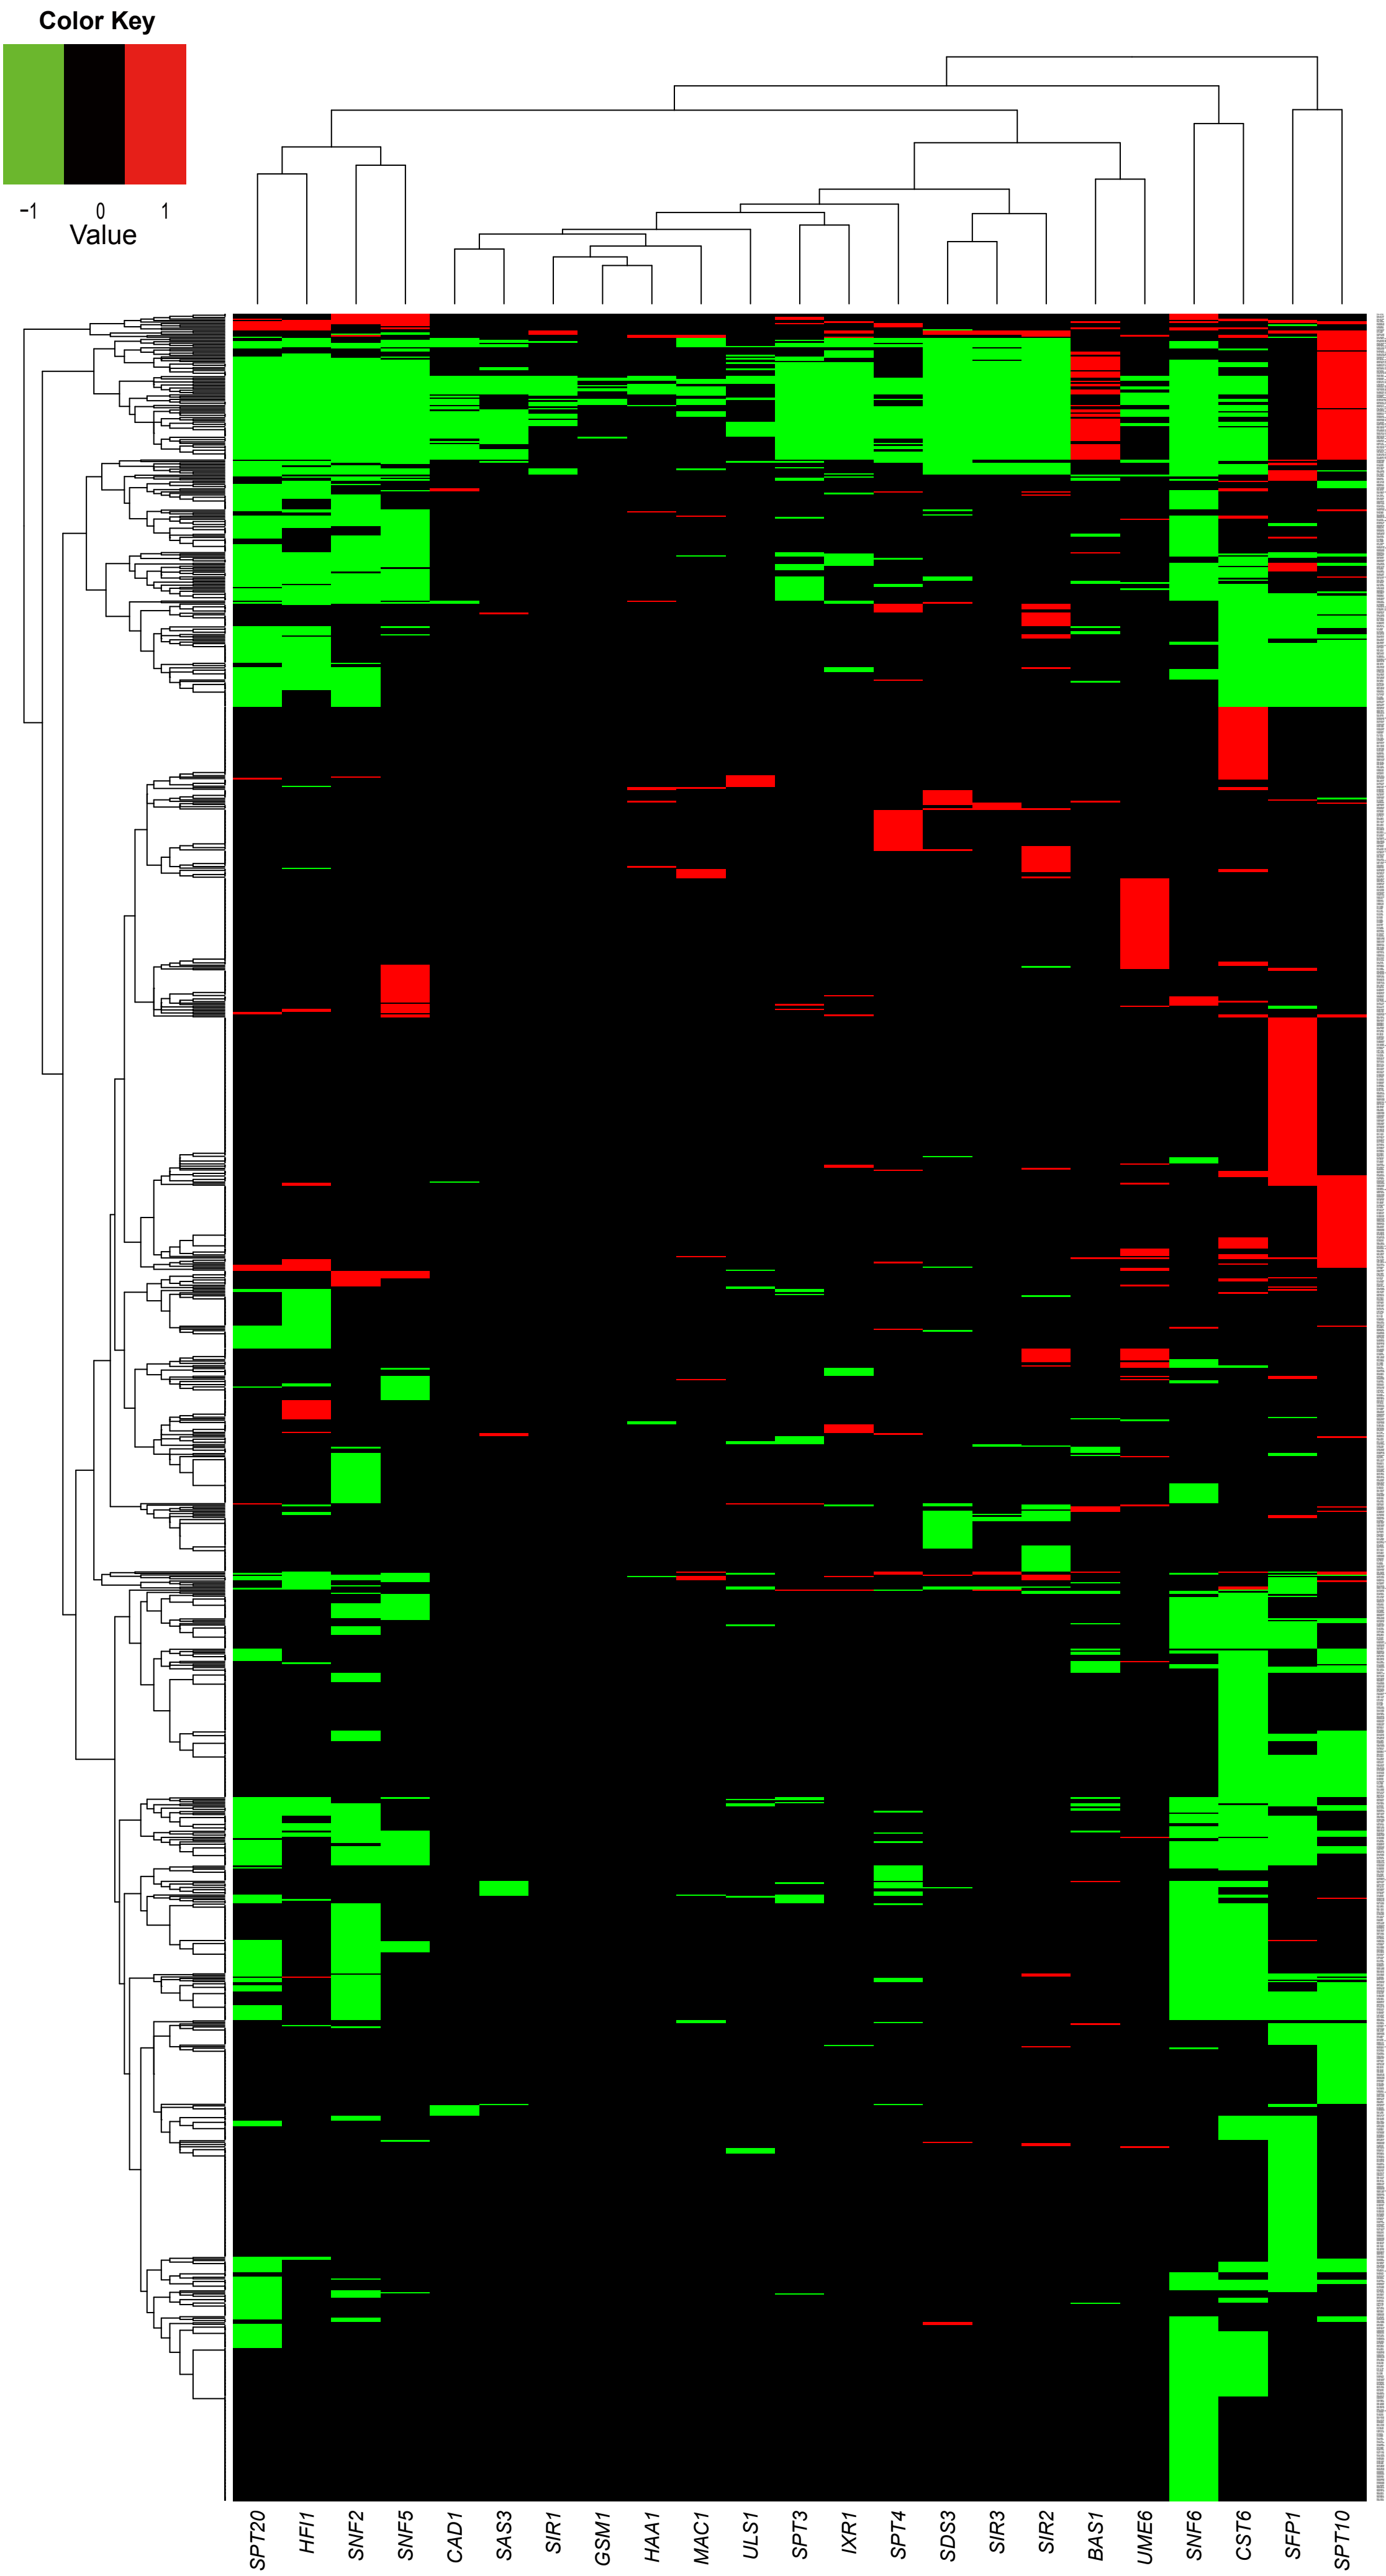

Supplement: Supplementary file 1 [file 1 › Figure_S3.pdf]
